# Supplementary material
Source: PubMed Central journal article supplement (PMC5444169)
Supplement: AAC.02546-16_zac006176200s1.pdf [file AAC.02546-16_zac006176200s1.pdf]

# **A library of seleno-compounds and Leishmania species: Rising evidences towards novel agents**

Álvaro Martín-Montes<sup>1</sup>, Daniel Plano<sup>2,3</sup>, Rubén Martín-Escolano<sup>1</sup>, Verónica Alcolea<sup>2,3</sup>, Marta Díaz<sup>2,3</sup>, Silvia Pérez-Silanes<sup>4</sup>, Socorro Espuelas<sup>3</sup>, Esther Moreno<sup>3</sup>, Clotilde Marín<sup>1</sup>, Ramón Gutiérrez-Sánchez<sup>5</sup>, Carmen Sanmartín<sup>2,3\*</sup>, Manuel Sánchez-Moreno<sup>1,\*</sup>

<sup>1</sup>*Universidad de Granada. Departamento de Parasitología. Facultad de Ciencias, Severo Ochoa s/n Granada, Spain. Instituto de Investigación Biosanitaria (ibs. Granada). Hospitales Universitarios De Granada*

<sup>2</sup>*Universidad de Navarra, Departamento de Química Orgánica y Farmacéutica, Facultad de Farmacia y Nutrición, Campus Universitario, 31080, Pamplona, Spain. IdiSNA, Instituto de Investigación Sanitaria de Navarra.*

<sup>3</sup>*Institute of Tropical Health, University of Navarra, 31008, Pamplona, Spain.*

<sup>4</sup>*Department of Organic and Pharmaceutical Chemistry, Institute of Tropical Health, University of Navarra. 31008, Pamplona, Spain*

<sup>5</sup>*Department of Statistics, University of Granada, Severo Ochoa s/n, E-18071 Granada, Spain*

## **AUTHOR INFORMATION**

### **Corresponding Authors**

\* Carmen Sanmartín Grijalba. Phone: (+34)948425600; e-mail: sanmartin@unav.es.

\* Manuel Sanchez Moreno. Phone (+34)958242369; e-mail msanchem@ugr.es.

**Table S1.** Physical constants and spectroscopic data for the presented compounds.

| Comp.     | IR (KBr; cm <sup>-1</sup> )                     | <sup>1</sup> H NMR (400 MHz, DMSO-d <sub>6</sub> , δ, <i>J</i> in Hz)                                                                                                                                                                                  | <sup>13</sup> C NMR (100 MHz, DMSO-d <sub>6</sub> , δ)                                                                                                                                                                                                                                                                                        | CHN analysis (%) calcd/found                                      |
|-----------|-------------------------------------------------|--------------------------------------------------------------------------------------------------------------------------------------------------------------------------------------------------------------------------------------------------------|-----------------------------------------------------------------------------------------------------------------------------------------------------------------------------------------------------------------------------------------------------------------------------------------------------------------------------------------------|-------------------------------------------------------------------|
| <b>1</b>  | 2149 (s, C≡N)                                   | 4.29 (s, 2H, CH <sub>2</sub> ), 7.33 (d, 2H, <i>J</i> <sub>2-3</sub> = <i>J</i> <sub>6-5</sub> = 8.0, H <sub>2</sub> +H <sub>6</sub> ); 7.5 (d, 2H, H <sub>3</sub> +H <sub>5</sub> )                                                                   | 32.6 (1C, CH <sub>2</sub> ); 105.7 (1C, CN); 121.9 (1C, C <sub>4</sub> -benzyl); 132.5 (4C, C <sub>2</sub> +C <sub>3</sub> +C <sub>5</sub> +C <sub>6</sub> -benzyl); 138.8 (1C, C <sub>1</sub> -benzyl)                                                                                                                                       | <b>C:</b> 34.92/35.42; <b>H:</b> 2.18/2.49; <b>N:</b> 5.09/4.74   |
| <b>2</b>  | 1008 (s, C-Br),<br>710 (m, Se-Se)               | 3.93 (s, 4H, 2CH <sub>2</sub> ); 7.19 (d, 4H, <i>J</i> <sub>2-3</sub> = <i>J</i> <sub>6-5</sub> = 8.4, H <sub>2</sub> +H <sub>6</sub> +H <sub>2</sub> +H <sub>6</sub> ); 7.51 (d, 4H, H <sub>3</sub> +H <sub>5</sub> +H <sub>3</sub> +H <sub>5</sub> ) | 31.4 (2C, CH <sub>2</sub> ); 120.9 (2C, C <sub>4</sub> , C <sub>4</sub> '-benzyl); 131.9 (4C, C <sub>2</sub> +C <sub>6</sub> +C <sub>2</sub> +C <sub>6</sub> '-benzyl); 132.1 (4C, C <sub>3</sub> +C <sub>5</sub> +C <sub>3</sub> +C <sub>5</sub> '-benzyl); 139.6 (2C, C <sub>1</sub> +C <sub>1</sub> '-benzyl)                              | <b>C:</b> 33.73/33.37; <b>H:</b> 2.41/2.31                        |
| <b>3</b>  | 2146 (s, C≡N)                                   | 4.31 (s, 2H, CH <sub>2</sub> ), 7.29-7.32 (m, 1H, H <sub>4</sub> ); 7.37-7.38 (m, 4H, H <sub>2</sub> +H <sub>3</sub> +H <sub>5</sub> +H <sub>6</sub> )                                                                                                 | 33.5 (1C, CH <sub>2</sub> ); 105.8 (1C, CN); 129.3, 129.6, 129.9 (5C, C <sub>2</sub> +C <sub>3</sub> +C <sub>4</sub> +C <sub>5</sub> +C <sub>6</sub> -benzyl); 139.2 (1C, C <sub>1</sub> -benzyl)                                                                                                                                             | <b>C:</b> 48.98/48.90; <b>H:</b> 3.57/3.80; <b>N:</b> 7.14/6.68   |
| <b>4</b>  | 754 (m, Se-Se)                                  | 3.91 (s, 4H, 2CH <sub>2</sub> ); 7.23-7.24 (m, 10H, H <sub>2</sub> +H <sub>3</sub> +H <sub>4</sub> +H <sub>5</sub> +H <sub>6</sub> +H <sub>2</sub> +H <sub>3</sub> +H <sub>4</sub> +H <sub>5</sub> +H <sub>6</sub> )                                   | 32.4 (2C, CH <sub>2</sub> ); 127.2, 128.3, 128.7, 129.2, 129.7, 130.5 (10C, C <sub>2</sub> +C <sub>3</sub> +C <sub>4</sub> +C <sub>5</sub> +C <sub>6</sub> +C <sub>2</sub> +C <sub>3</sub> +C <sub>4</sub> +C <sub>5</sub> +C <sub>6</sub> '-benzyl); 140.0 (2C, C <sub>1</sub> +C <sub>1</sub> '-benzyl)                                     | <b>C:</b> 49.41/49.43; <b>H:</b> 4.12/4.24                        |
| <b>5</b>  | 2147 (s, C≡N),<br>1518 (s, NO <sub>2</sub> )    | 4.41 (s, 2H, CH <sub>2</sub> ), 7.64 (d, 2H, <i>J</i> <sub>2-3</sub> = <i>J</i> <sub>6-5</sub> = 8.0, H <sub>2</sub> +H <sub>6</sub> ); 8.25 (d, 2H, H <sub>3</sub> +H <sub>5</sub> )                                                                  | 32.0 (1C, CH <sub>2</sub> ); 105.7 (1C, CN); 124.6, 124.8 (2C, C <sub>3</sub> +C <sub>5</sub> -benzyl); 131.0 (2C, C <sub>2</sub> +C <sub>6</sub> -benzyl); 147.4 (2C, C <sub>1</sub> +C <sub>6</sub> -benzyl)                                                                                                                                | <b>C:</b> 39.83/39.96; <b>H:</b> 2.49/2.50; <b>N:</b> 11.62/11.56 |
| <b>6</b>  | 1516 (s, NO <sub>2</sub> ),<br>741 (m, Se-Se)   | 4.12 (s, 4H, 2CH <sub>2</sub> ); 7.47 (d, 4H, <i>J</i> <sub>2-3</sub> = <i>J</i> <sub>6-5</sub> = 8.5, H <sub>2</sub> +H <sub>6</sub> +H <sub>2</sub> +H <sub>6</sub> ); 8.17 (d, 4H, H <sub>3</sub> +H <sub>5</sub> +H <sub>3</sub> +H <sub>5</sub> ) | 30.9 (2C, CH <sub>2</sub> ); 124.3 (4C, C <sub>3</sub> +C <sub>5</sub> +C <sub>3</sub> +C <sub>5</sub> '-benzyl); 130.9 (4C, C <sub>2</sub> +C <sub>6</sub> +C <sub>2</sub> +C <sub>6</sub> '-benzyl); 147.1 (2C, C <sub>1</sub> +C <sub>1</sub> '-benzyl); 148.5 (2C, C <sub>4</sub> +C <sub>4</sub> '-benzyl)                               | <b>C:</b> 39.07/39.09; <b>H:</b> 2.79/2.78; <b>N:</b> 6.51/6.37   |
| <b>7</b>  | 2155 (s, C≡N),<br>1326 (s, C-F)                 | 4.37 (s, 2H, CH <sub>2</sub> ); 7.59 (d, 2H, <i>J</i> <sub>2-3</sub> = <i>J</i> <sub>6-5</sub> = 8.1, H <sub>2</sub> +H <sub>6</sub> ); 7.75 (d, 2H, H <sub>3</sub> +H <sub>5</sub> )                                                                  | 32.3 (1C, CH <sub>2</sub> ); 105.7 (1C, CN); 124.1 (1C, CF <sub>3</sub> ); 126.4 (2C, C <sub>3</sub> +C <sub>5</sub> -benzyl); 129.2 (1C, C <sub>4</sub> -benzyl); 130.5 (2C, C <sub>2</sub> +C <sub>6</sub> -benzyl); 144.2 (1C, C <sub>1</sub> -benzyl)                                                                                     | <b>C:</b> 40.90/41.10; <b>H:</b> 2.27/2.27; <b>N:</b> 5.30/4.94   |
| <b>8</b>  | 1325 (s, C-F),<br>746 (w, Se-Se)                | 4.04 (s, 4H, 2CH <sub>2</sub> ); 7.43 (d, 4H, <i>J</i> <sub>2-3</sub> = <i>J</i> <sub>6-5</sub> = 7.9, H <sub>2</sub> +H <sub>6</sub> +H <sub>2</sub> +H <sub>6</sub> ); 7.67 (d, 4H, H <sub>3</sub> +H <sub>5</sub> +H <sub>3</sub> +H <sub>5</sub> ) | 31.2 (2C, CH <sub>2</sub> ); 123.8 (2C, CF <sub>3</sub> ); 126.0 (4C, C <sub>3</sub> +C <sub>5</sub> +C <sub>3</sub> +C <sub>5</sub> '-benzyl); 128.2 (2C, C <sub>4</sub> +C <sub>4</sub> '-benzyl); 130.5 (4C, C <sub>2</sub> +C <sub>6</sub> +C <sub>2</sub> +C <sub>6</sub> '-benzyl); 145.1 (2C, C <sub>1</sub> +C <sub>1</sub> '-benzyl) | <b>C:</b> 40.34/40.84; <b>H:</b> 2.52/2.53                        |
| <b>9</b>  | 2143 (s, C≡N),<br>1490 (s, S-CH <sub>3</sub> )  | 2.47 (s, 3H, CH <sub>3</sub> ); 4.29 (s, 2H, CH <sub>2</sub> ); 7.24 (d, 2H, <i>J</i> <sub>2-3</sub> = <i>J</i> <sub>6-5</sub> = 8.2, H <sub>2</sub> +H <sub>6</sub> ); 7.31 (d, 2H, H <sub>3</sub> +H <sub>5</sub> )                                  | 15.4 (1C, SCH <sub>3</sub> ); 33.4 (1C, CH <sub>2</sub> ); 105.8 (1C, CN); 126.7 (2C, C <sub>3</sub> +C <sub>5</sub> -benzyl); 130.3 (2C, C <sub>2</sub> +C <sub>6</sub> -benzyl); 135.6 (1C, C <sub>1</sub> -benzyl); 138.8 (1C, C <sub>4</sub> -benzyl)                                                                                     | <b>C:</b> 44.62/44.63; <b>H:</b> 3.71/3.80; <b>N:</b> 5.78/5.55   |
| <b>10</b> | 1491 (s, S-CH <sub>3</sub> ),<br>718 (w, Se-Se) | 2.45 (s, 6H, 2CH <sub>3</sub> ); 3.90 (s, 4H, 2CH <sub>2</sub> ); 7.19 (s, 8H, H <sub>2</sub> +H <sub>2</sub> +H <sub>3</sub> +H <sub>3</sub> +H <sub>5</sub> +H <sub>5</sub> +H <sub>6</sub> +H <sub>6</sub> )                                        | 15.6 (2C, SCH <sub>3</sub> ); 32.1 (2C, CH <sub>2</sub> ); 126.7 (4C, C <sub>3</sub> +C <sub>5</sub> +C <sub>3</sub> +C <sub>5</sub> '-benzyl); 130.4 (4C, C <sub>2</sub> +C <sub>6</sub> +C <sub>2</sub> +C <sub>6</sub> '-benzyl); 136.5 (2C, C <sub>1</sub> +C <sub>1</sub> '-benzyl); 137.6 (2C, C <sub>4</sub> +C <sub>4</sub> '-benzyl) | <b>C:</b> 44.44/44.12; <b>H:</b> 4.16/4.20                        |
| <b>11</b> | 2149 (s, C≡N)                                   | 2.30 (s, 3H, CH <sub>3</sub> ); 4.29 (s, 2H, CH <sub>2</sub> ), 7.17 (d, 2H, <i>J</i> <sub>3-2</sub> = <i>J</i> <sub>5-6</sub> = 8.0, H <sub>3</sub> +H <sub>5</sub> ); 7.26 (d, 2H, H <sub>2</sub> +H <sub>6</sub> )                                  | 21.5 (1C, CH <sub>3</sub> ); 33.5 (1C, CH <sub>2</sub> ); 105.8 (1C, CN); 129.1, 129.6, 130.2, 130.5 (4C, C <sub>2</sub> +C <sub>3</sub> +C <sub>5</sub> +C <sub>6</sub> -benzyl); 136.1, 138.0 (2C, C <sub>1</sub> +C <sub>4</sub> -benzyl)                                                                                                  | <b>C:</b> 51.43/51.54; <b>H:</b> 4.29/4.42; <b>N:</b> 6.67/6.42   |
| <b>12</b> | 739 (w, Se-Se)                                  | 2.27 (s, 6H, 2CH <sub>3</sub> ); 3.90 (s, 4H, 2CH <sub>2</sub> ); 7.12 (s, 8H, H <sub>2</sub> +H <sub>3</sub> +H <sub>5</sub> +H <sub>6</sub> +H <sub>2</sub> +H <sub>3</sub> +H <sub>5</sub> +H <sub>6</sub> )                                        | 21.6 (2C, CH <sub>3</sub> ); 32.4 (2C, CH <sub>2</sub> ); 129.6, 130.4 (10C, C <sub>2</sub> +C <sub>3</sub> +C <sub>4</sub> +C <sub>5</sub> +C <sub>6</sub> +C <sub>2</sub> +C <sub>3</sub> +C <sub>4</sub> +C <sub>5</sub> +C <sub>6</sub> '-benzyl); 137.0 (2C, C <sub>1</sub> +C <sub>1</sub> '-benzyl)                                    | <b>C:</b> 52.17/52.13; <b>H:</b> 4.89/4.77                        |

|           |                                                 |                                                                                                                                                                                                                                                                                                         |                                                                                                                                                                                                                                                                                                                                                                                    |                                                                      |
|-----------|-------------------------------------------------|---------------------------------------------------------------------------------------------------------------------------------------------------------------------------------------------------------------------------------------------------------------------------------------------------------|------------------------------------------------------------------------------------------------------------------------------------------------------------------------------------------------------------------------------------------------------------------------------------------------------------------------------------------------------------------------------------|----------------------------------------------------------------------|
| <b>13</b> | 2229 (s, C≡N),<br>2144 (s, C≡N)                 | 4.36 (s, 2H, CH <sub>2</sub> ); 7.56 (d, 2H, $J_{2,3}=J_{6,5}=8.3$ ,<br>H <sub>2</sub> +H <sub>6</sub> ); 7.85 (d, 2H, H <sub>3</sub> +H <sub>5</sub> )                                                                                                                                                 | 32.5 (1C, CH <sub>2</sub> ); 105.6 (1C, SeCN); 111.3 (1C, C <sub>4</sub> -benzyl);<br>119.5 (1C, CN); 130.7 (2C, C <sub>2</sub> +C <sub>6</sub> -benzyl); 133.4 (2C,<br>C <sub>3</sub> +C <sub>5</sub> -benzyl); 145.2 (1C, C <sub>1</sub> -benzyl)                                                                                                                                | <b>C:</b> 49.05/48.95; <b>H:</b> 2.76/2.69;<br><b>N:</b> 12.47/12.33 |
| <b>14</b> | 2229 (s, C≡N),<br>729 (w, Se-Se)                | 4.02 (s, 4H, 2CH <sub>2</sub> ); 7.40 (d, 4H, $J_{2,3}=J_{6,5}=8.2$ ,<br>H <sub>2</sub> +H <sub>6</sub> +H <sub>2'</sub> +H <sub>6'</sub> ); 7.77 (d, 4H, H <sub>3</sub> +H <sub>5</sub> +H <sub>3'</sub> +H <sub>5'</sub> )                                                                            | 31.3 (2C, CH <sub>2</sub> ); 110.3 (2C, C <sub>4</sub> , C <sub>4'</sub> -benzyl); 119.8 (2C,<br>CN); 130.7 (4C, C <sub>2</sub> +C <sub>6</sub> +C <sub>2'</sub> +C <sub>6'</sub> -benzyl); 133.1 (4C,<br>C <sub>3</sub> +C <sub>5</sub> +C <sub>3'</sub> +C <sub>5'</sub> -benzyl); 146.2 (2C, C <sub>1</sub> +C <sub>1'</sub> -benzyl)                                           | <b>C:</b> 49.23/49.04; <b>H:</b> 3.07/3.11;<br><b>N:</b> 7.18/7.07   |
| <b>15</b> | 2146 (m, C≡N),<br>1515 (s, C-NO <sub>2</sub> )  | 4.60 (s, 2H, CH <sub>2</sub> ); 7.60-7.64 (m, 1H, H <sub>4</sub> ); 7.67<br>(d, 1H, $J_{6,5}=7.6$ , H <sub>6</sub> ); 7.77-7.81 (m, 1H, H <sub>5</sub> );<br>8.12 (d, 1H, $J_{3,4}=8.2$ , H <sub>3</sub> )                                                                                              | 29.6 (1C, CH <sub>2</sub> ); 104.9 (1C, CN); 126.3 (1C, C <sub>3</sub> -benzyl);<br>130.5 (1C, C <sub>4</sub> -benzyl); 133.5 (1C, C <sub>6</sub> -benzyl); 133.9 (1C, C <sub>1</sub> -<br>benzyl); 135.1 (1C, C <sub>5</sub> -benzyl); 148.0 (1C, C <sub>2</sub> -benzyl)                                                                                                         | <b>C:</b> 39.83/39.56; <b>H:</b> 2.49/2.54;<br><b>N:</b> 11.62/11.40 |
| <b>16</b> | 1511 (s, C-NO <sub>2</sub> ),<br>741 (m, Se-Se) | 4.27, (s, 4H, 2CH <sub>2</sub> ); 7.36 (d, 2H, $J_{6,5}=J_{6',5'}=7.3$ ,<br>H <sub>6</sub> +H <sub>6'</sub> ); 7.51-7.55 (m, 2H, H <sub>4</sub> +H <sub>4'</sub> ); 7.66-7.69<br>(m, 2H, H <sub>5</sub> +H <sub>5'</sub> ); 8.05 (d, 2H, $J_{3,4}=J_{3',4'}=8.0$ ,<br>H <sub>3</sub> +H <sub>3'</sub> ) | 30.4 (2C, CH <sub>2</sub> ); 126.2 (2C, C <sub>3</sub> +C <sub>3'</sub> -benzyl); 129.6 (2C,<br>C <sub>4</sub> +C <sub>4'</sub> -benzyl); 133.1 (2C, C <sub>6</sub> +C <sub>6'</sub> -benzyl); 134.6 (2C, C <sub>1</sub> +C <sub>1'</sub> -<br>benzyl); 135.5 (2C, C <sub>5</sub> +C <sub>5'</sub> -benzyl); 148.0 (2C, C <sub>2</sub> +C <sub>2'</sub> -benzyl)                   | <b>C:</b> 39.07/39.08; <b>H:</b> 2.79/2.76;<br><b>N:</b> 6.51/6.56   |
| <b>17</b> | 2147 (m, C≡N),<br>1520 (s, C-NO <sub>2</sub> )  | 4.44 (s, 2H, CH <sub>2</sub> ); 7.67-7.71 (m, 1H, H <sub>5</sub> ); 7.83<br>(d, 1H, $J_{6,5}=7.7$ , H <sub>6</sub> ); 8.18 (d, 1H, $J_{4,5}=8.1$ , H <sub>4</sub> );<br>8.27 (s, 1H, H <sub>2</sub> )                                                                                                   | 31.9 (1C, CH <sub>2</sub> ); 105.6 (1C, CN); 123.5 (1C, C <sub>4</sub> -benzyl);<br>124.3 (1C, C <sub>2</sub> -benzyl); 131.1 (1C, C <sub>5</sub> -benzyl); 136.3 (1C, C <sub>6</sub> -<br>benzyl); 141.8 (1C, C <sub>1</sub> -benzyl); 148.6 (1C, C <sub>3</sub> -benzyl)                                                                                                         | <b>C:</b> 39.83/39.95; <b>H:</b> 2.49/2.60;<br><b>N:</b> 11.62/11.24 |
| <b>18</b> | 1521 (s, C-NO <sub>2</sub> ),<br>737 (m, Se-Se) | 4.13 (s, 4H, 2CH <sub>2</sub> ); 7.58-7.62 (m, 2H, H <sub>5</sub> +H <sub>5'</sub> );<br>7.67 (d, 2H, $J_{6,5}=J_{6',5'}=7.7$ , H <sub>6</sub> +H <sub>6'</sub> ); 8.05 (s, 2H,<br>H <sub>2</sub> +H <sub>2'</sub> ); 8.09 (d, 2H, $J_{4,5}=J_{4',5'}=8.2$ , H <sub>4</sub> +H <sub>4'</sub> )          | 30.5 (2C, CH <sub>2</sub> ); 122.6 (2C, C <sub>4</sub> +C <sub>4'</sub> -benzyl); 124.1 (2C,<br>C <sub>2</sub> +C <sub>2'</sub> -benzyl); 130.6 (2C, C <sub>5</sub> +C <sub>5'</sub> -benzyl); 136.3 (2C, C <sub>6</sub> +C <sub>6'</sub> -<br>benzyl); 142.7 (2C, C <sub>1</sub> +C <sub>1'</sub> -benzyl); 148.4 (2C, C <sub>3</sub> +C <sub>3'</sub> -benzyl)                   | <b>C:</b> 39.07/39.25; <b>H:</b> 2.79/2.73;<br><b>N:</b> 6.51/6.46   |
| <b>19</b> | 2230 (s, C≡N),<br>2151 (s, C≡N)                 | 4.47 (s, 1H, CH <sub>2</sub> ); 7.49-7.53, (m, 1H, H <sub>4</sub> ); 7.63<br>(d, 1H, $J_{6,5}=7.7$ , H <sub>6</sub> ); 7.71-7.75, (m, 1H, H <sub>5</sub> );<br>7.86 (d, 1H, $J_{3,4}=7.6$ , H <sub>3</sub> )                                                                                            | 30.5 (1C, CH <sub>2</sub> ); 104.9 (1C, SeCN); 112.3 (1C, C <sub>2</sub> -benzyl);<br>117.9 (1C, CN); 129.6 (1C, C <sub>4</sub> -benzyl); 131.7 (1C, C <sub>6</sub> -benzyl);<br>134.1 (1C, C <sub>3</sub> -benzyl); 134.3 (1C, C <sub>5</sub> -benzyl); 142.2 (1C, C <sub>1</sub> -<br>benzyl)                                                                                    | <b>C:</b> 49.05/48.83; <b>H:</b> 2.76/2.80;<br><b>N:</b> 12.47/12.40 |
| <b>20</b> | 2224 (s, C≡N);<br>762 (w, Se-Se)                | 4.18 (s, 4H, 2CH <sub>2</sub> ); 7.43-7.48 (m, 4H,<br>H <sub>4</sub> +H <sub>6</sub> +H <sub>4'</sub> +H <sub>6'</sub> ); 7.65-7.69 (m, 2H, H <sub>5</sub> +H <sub>5'</sub> );<br>7.82 (d, 2H, $J_{3,4}=J_{3',4'}=7.9$ , H <sub>3</sub> +H <sub>3'</sub> )                                              | 30.0 (2C, CH <sub>2</sub> ); 112.2 (2C, C <sub>2</sub> +C <sub>2'</sub> -benzyl); 118.5 (2C, CN);<br>128.8 (2C, C <sub>4</sub> +C <sub>4'</sub> -benzyl); 131.2 (2C, C <sub>6</sub> +C <sub>6'</sub> -benzyl); 133.9<br>(2C, C <sub>3</sub> +C <sub>3'</sub> -benzyl); 134.1 (2C, C <sub>5</sub> +C <sub>5'</sub> -benzyl); 143.4 (2C,<br>C <sub>1</sub> +C <sub>1'</sub> -benzyl) | <b>C:</b> 49.23/49.63; <b>H:</b> 3.07/3.11;<br><b>N:</b> 7.18/7.07   |
| <b>21</b> | 2226 (s, C≡N),<br>2150 (s, C≡N)                 | 4.35 (s, 2H, CH <sub>2</sub> ); 7.59-7.62 (m, 1H, H <sub>5</sub> ); 7.72<br>(d, 1H, $J_{6,5}=8.2$ , H <sub>6</sub> ); 7.78 (d, 1H, $J_{4,5}=7.7$ , H <sub>4</sub> );<br>7.80 (s, 1H, H <sub>2</sub> )                                                                                                   | 32.0 (1C, CH <sub>2</sub> ); 105.6 (1C, SeCN); 112.3 (1C, C <sub>3</sub> -benzyl);<br>119.4 (1C, CN); 130.8 (1C, C <sub>5</sub> -benzyl); 132.4 (1C, C <sub>4</sub> -benzyl);<br>133.1 (1C, C <sub>2</sub> -benzyl); 134.7 (1C, C <sub>6</sub> -benzyl); 141.2 (1C, C <sub>1</sub> -<br>benzyl)                                                                                    | <b>C:</b> 49.05/48.83; <b>H:</b> 2.76/2.68;<br><b>N:</b> 12.47/12.26 |
| <b>22</b> | 2223 (s, C≡N);<br>687 (w, Se-Se)                | 4.01 (s, 4H, 2CH <sub>2</sub> ); 7.51-7.55 (m, 2H, H <sub>5</sub> +H <sub>5'</sub> );<br>7.57 (d, 2H, $J_{6,5}=J_{6',5'}=8.0$ , H <sub>6</sub> +H <sub>6'</sub> ); 7.64 (s, 2H,<br>H <sub>2</sub> +H <sub>2'</sub> ); 7.72 (d, 2H, $J_{4,5}=J_{4',5'}=7.3$ , H <sub>4</sub> +H <sub>4'</sub> )          | 30.6 (2C, CH <sub>2</sub> ); 112.0 (2C, C <sub>3</sub> +C <sub>3'</sub> -benzyl); 119.5 (2C, CN);<br>130.5 (2C, C <sub>5</sub> +C <sub>5'</sub> -benzyl); 131.0 (2C, C <sub>4</sub> +C <sub>4'</sub> -benzyl); 133.0<br>(2C, C <sub>2</sub> +C <sub>2'</sub> -benzyl); 134.6 (2C, C <sub>6</sub> +C <sub>6'</sub> -benzyl); 141.9 (2C,<br>C <sub>1</sub> +C <sub>1'</sub> -benzyl) | <b>C:</b> 49.23/48.88; <b>H:</b> 3.07/3.27;<br><b>N:</b> 7.18/7.29   |
| <b>23</b> | 2150 (s, C≡N);                                  | 4.36 (s, 2H, CH <sub>2</sub> -Se); 6.10 (s, 2H, O-CH <sub>2</sub> -O);                                                                                                                                                                                                                                  | 34.3 (CH <sub>2</sub> -Se); 103.5 (O-CH <sub>2</sub> -O); 105.9 (CN); 111.3 (C <sub>6</sub> );                                                                                                                                                                                                                                                                                     | <b>C:</b> 33.86/34.02; <b>H:</b> 1.88/2.05;                          |

|           |                                  |                                                                                                                                                                                                                                                                                                                                                                                                                                                                                                                |                                                                                                                                                                                                                                                                                                                                                                                                                                                                                             |                                                                      |
|-----------|----------------------------------|----------------------------------------------------------------------------------------------------------------------------------------------------------------------------------------------------------------------------------------------------------------------------------------------------------------------------------------------------------------------------------------------------------------------------------------------------------------------------------------------------------------|---------------------------------------------------------------------------------------------------------------------------------------------------------------------------------------------------------------------------------------------------------------------------------------------------------------------------------------------------------------------------------------------------------------------------------------------------------------------------------------------|----------------------------------------------------------------------|
|           | 1033 (s, C-Br)                   | 7.11 (s, 1H, H <sub>6</sub> ); 7.27 (s, 1H, H <sub>3</sub> )                                                                                                                                                                                                                                                                                                                                                                                                                                                   | 113.8 (C <sub>4</sub> ); 115.1 (C <sub>3</sub> ); 130.6 (C <sub>5</sub> ); 148.2 (C <sub>2</sub> ); 149.4 (C <sub>1</sub> )                                                                                                                                                                                                                                                                                                                                                                 | <b>N:</b> 4.39/4.13                                                  |
| <b>24</b> | 766 (s, Se-Se)                   | 4.03 (s, 4H, CH <sub>2</sub> -Se+CH <sub>2</sub> -Se); 6.00 (s, 4H, O-CH <sub>2</sub> -O+O-CH <sub>2</sub> -O); 6.77 (s, 2H, H <sub>6</sub> +H <sub>6</sub> ); 7.01 (s, 2H, H <sub>3</sub> +H <sub>3</sub> )                                                                                                                                                                                                                                                                                                   | 33.3 (CH <sub>2</sub> -Se); 103.1 (O-CH <sub>2</sub> -O); 111.6 (C <sub>6</sub> +C <sub>6</sub> ); 113.7 (C <sub>4</sub> +C <sub>4</sub> ); 115.2 (C <sub>3</sub> +C <sub>3</sub> ); 132.9 (C <sub>5</sub> +C <sub>5</sub> ); 147.0 (C <sub>2</sub> +C <sub>2</sub> ); 148.8 (C <sub>1</sub> +C <sub>1</sub> )                                                                                                                                                                              | <b>C:</b> 32.76/32.99; <b>H:</b> 2.04/2.02                           |
| <b>25</b> | 2138 (s, C≡N);<br>1593 (f, C=N)  | 4.89 (s, 2H, CH <sub>2</sub> -Se); 7.58-7.63 (m, 2H, H <sub>6</sub> +H <sub>7</sub> ); 7.88 (m, 1H, H <sub>3</sub> ); 7.97 (dd, 1H, J <sub>5-6</sub> =8.1, J <sub>5-7</sub> =1.6, H <sub>5</sub> ); 8.44 (dd, 1H, J <sub>4-3</sub> =8.4, J <sub>4-2</sub> =2.2, H <sub>4</sub> ); 8.94 (dd, 1H, J <sub>2-3</sub> =4.3, J <sub>2-4</sub> =2.2, H <sub>2</sub> )                                                                                                                                                 | 29.5 (CH <sub>2</sub> -Se); 106.1 (CN); 123.6 (C <sub>3</sub> ); 127.3 (C <sub>7</sub> ); 129.5 (C <sub>5</sub> +C <sub>6</sub> ); 131.7 (C <sub>8</sub> ); 136.0 (C <sub>9</sub> ); 138.1 (C <sub>4</sub> ); 146.9 (C <sub>2</sub> )                                                                                                                                                                                                                                                       | <b>C:</b> 53.44/53.35; <b>H:</b> 3.33/3.49;<br><b>N:</b> 11.33/11.06 |
| <b>26</b> | 1591 (s, C=C);<br>790 (s, Se-Se) | 4.58 (s, 4H, 2CH <sub>2</sub> -Se); 7.43-7.48 (m, 4H, H <sub>6</sub> +H <sub>7</sub> +H <sub>6</sub> +H <sub>7</sub> ); 7.57 (dd, 2H, J <sub>3-4</sub> =8.1, J <sub>3-2</sub> =4.6, H <sub>3</sub> +H <sub>3</sub> ); 7.89 (dd, 2H, J <sub>5-6</sub> =8.1, J <sub>5-7</sub> =2.5, H <sub>5</sub> +H <sub>5</sub> ); 8.38 (dd, 2H, J <sub>4-3</sub> =8.1, J <sub>4-2</sub> =2.5, H <sub>4</sub> +H <sub>4</sub> ); 8.97 (dd, 2H, J <sub>2-3</sub> =4.6, J <sub>2-4</sub> =2.5, H <sub>2</sub> +H <sub>2</sub> ) | 30.2 (CH <sub>2</sub> -Se); 122.5 (C <sub>3</sub> +C <sub>3</sub> ); 127.1 (C <sub>7</sub> +C <sub>7</sub> ); 128.0 (C <sub>5</sub> +C <sub>6</sub> +C <sub>5</sub> +C <sub>6</sub> ); 130.7 (C <sub>8</sub> +C <sub>8</sub> ); 137.9 (C <sub>9</sub> +C <sub>9</sub> ); 138.4 (C <sub>4</sub> +C <sub>4</sub> ); 146.2 (C <sub>2</sub> +C <sub>2</sub> ); 150.1 (C <sub>10</sub> +C <sub>10</sub> )                                                                                        | <b>C:</b> 54.30/54.80; <b>H:</b> 3.62/4.00;<br><b>N:</b> 6.33/6.10   |
| <b>27</b> | 2142 (m, C≡N);<br>1591 (m, C=N)  | 4.73 (s, 4H, 2CH <sub>2</sub> ); 7.62 (t, 2H, J <sub>6-5</sub> =J <sub>7-8</sub> =11.0, H <sub>6</sub> +H <sub>7</sub> ); 7.79 (d, 1H, J <sub>3-4</sub> =9.4, H <sub>3</sub> ); 7.98 (dd, 2H, J <sub>5-6</sub> =J <sub>8-7</sub> =11.0, J <sub>5-7</sub> =J <sub>8-6</sub> =9.4, H <sub>5</sub> +H <sub>8</sub> ); 8.41 (d, 1H, J <sub>4-3</sub> =9.4, H <sub>4</sub> )                                                                                                                                        | 35.8 (CH <sub>2</sub> -Se); 105.9 (CN); 122.6 (C <sub>3</sub> ); 127.3 (C <sub>5</sub> +C <sub>7</sub> ); 129.0 (C <sub>6</sub> +C <sub>9</sub> ); 131.7 (C <sub>8</sub> ); 138.2 (C <sub>4</sub> ); 147.8 (C <sub>10</sub> ); 158.0 (C <sub>2</sub> )                                                                                                                                                                                                                                      | <b>C:</b> 53.44/53.52; <b>H:</b> 3.33/3.62;<br><b>N:</b> 11.33/11.10 |
| <b>28</b> | 2145 (m, C≡N);<br>1625 (d, C=N)  | 5.47 (s, 2H, CH <sub>2</sub> -Se); 7.69 (t, 2H, J <sub>2-1</sub> =J <sub>7-8</sub> =9.3, H <sub>2</sub> +H <sub>7</sub> ); 7.87 (t, 2H, J <sub>3-4</sub> =J <sub>6-5</sub> =9.1, H <sub>3</sub> +H <sub>6</sub> ); 8.19 (d, 2H, J <sub>4-3</sub> =J <sub>5-6</sub> =9.1, H <sub>4</sub> +H <sub>5</sub> ); 8.58 (d, 2H, J <sub>1-2</sub> =J <sub>8-7</sub> =9.3, H <sub>1</sub> +H <sub>8</sub> )                                                                                                              | 24.4 (CH <sub>2</sub> -Se); 104.0 (CN); 124.9 (C <sub>12</sub> +C <sub>14</sub> ); 125.3 (C <sub>1</sub> +C <sub>11</sub> ); 127.0 (C <sub>2</sub> +C <sub>10</sub> ); 130.7 (C <sub>4</sub> +C <sub>8</sub> ); 132.2 (C <sub>3</sub> +C <sub>9</sub> ); 142.1 (C <sub>13</sub> ); 149.4 (C <sub>5</sub> +C <sub>7</sub> )                                                                                                                                                                  | <b>C:</b> 60.60/60.74; <b>H:</b> 3.36/3.36;<br><b>N:</b> 9.42/9.13   |
| <b>29</b> | 2153 (s, C≡N);<br>1608 (m, C=N)  | 4.91 (s, 4H, CH <sub>2</sub> -Se); 7.87-7.89 (m, 2H, H <sub>6</sub> +H <sub>7</sub> ); 8.06-8.08 (m, 2H, H <sub>5</sub> +H <sub>8</sub> )                                                                                                                                                                                                                                                                                                                                                                      | 32.3 (CH <sub>2</sub> -Se); 105.0 (CN); 129.9 (C <sub>6</sub> +C <sub>9</sub> ); 132.2 (C <sub>7</sub> +C <sub>8</sub> ); 141.3 (C <sub>5</sub> +C <sub>10</sub> ); 151.0 (C <sub>2</sub> +C <sub>3</sub> )                                                                                                                                                                                                                                                                                 | <b>C:</b> 39.34/39.16; <b>H:</b> 2.18/2.17;<br><b>N:</b> 15.30/15.06 |
| <b>30</b> | 2150 (m, C≡N);<br>1709 (s, C=O)  | 3.83 (s, 3H, OCH <sub>3</sub> ); 3.87 (s, 3H, OCH <sub>3</sub> ); 4.42 (s, 2H, CH <sub>2</sub> -Se); 6.33 (s, 1H, CH-CO); 7.10 (s, 1H, H <sub>5</sub> ); 7.43 (s, 1H, H <sub>8</sub> )                                                                                                                                                                                                                                                                                                                         | 29.5 (CH <sub>2</sub> -Se); 56.3 (OCH <sub>3</sub> ); 58.7 (OCH <sub>3</sub> ); 100.1 (C <sub>9</sub> ); 102.7 (CN); 107.8 (C <sub>6</sub> ); 110.0 (C <sub>3</sub> ); 114.6 (C <sub>5</sub> ); 147.2 (C <sub>10</sub> ); 150.3 (C <sub>7</sub> ); 152.2 (C <sub>8</sub> ); 154.1 (C <sub>4</sub> ); 161.5 (CO)                                                                                                                                                                             | <b>C:</b> 48.15/48.02; <b>H:</b> 3.40/3.40;<br><b>N:</b> 4.32/4.20   |
| <b>31</b> | 1666 (s, C=O);<br>710 (m, Se-Se) | 4.21 (s, 4H, CH <sub>2</sub> -Se, CH <sub>2</sub> -Se); 7.70 (d, 2H, J <sub>3-4</sub> =8.1, H <sub>3</sub> +H <sub>3</sub> ); 7.86-7.89 (m, 4H, H <sub>5</sub> +H <sub>8</sub> +H <sub>5</sub> +H <sub>8</sub> ); 7.95 (s, 2H, H <sub>1</sub> +H <sub>1</sub> ); 8.06 (d, 2H, J <sub>4-3</sub> =8.1, H <sub>4</sub> +H <sub>4</sub> ); 8.09-8.11 (m, 4H, H <sub>6</sub> +H <sub>7</sub> +H <sub>6</sub> +H <sub>7</sub> )                                                                                      | 31.4 (CH <sub>2</sub> -Se); 127.6 (C <sub>1</sub> +C <sub>4</sub> +C <sub>8</sub> +C <sub>11</sub> +C <sub>1</sub> +C <sub>4</sub> +C <sub>8</sub> +C <sub>11</sub> ); 133.2 (C <sub>3</sub> +C <sub>3</sub> ); 134.1 (C <sub>9</sub> +C <sub>10</sub> +C <sub>9</sub> +C <sub>10</sub> ); 135.3 (C <sub>5</sub> +C <sub>7</sub> +C <sub>12</sub> +C <sub>14</sub> +C <sub>5</sub> +C <sub>7</sub> +C <sub>12</sub> +C <sub>14</sub> ); 148.0 (C <sub>2</sub> +C <sub>2</sub> ); 183.2 (CO) | <b>C:</b> 59.11/59.12; <b>H:</b> 3.12/3.44                           |
| <b>32</b> | 2149 (s, C≡N);<br>1678 (s, C=O)  | 1.63-1.67 (m, 6H, CH <sub>2</sub> -CH); 1.80-1.81 (m, 6H, CH <sub>2</sub> -C-CO); 1.99 (s, 3H, CH); 4.63 (s, 2H, CH <sub>2</sub> -Se)                                                                                                                                                                                                                                                                                                                                                                          | 27.1 (CH <sub>2</sub> -Se); 29.0 (CH); 36.7 (CH <sub>2</sub> -CH); 38.4 (CH <sub>2</sub> -C-CO); 47.1 (C-CO); 104.5 (CN); 210.2 (CO)                                                                                                                                                                                                                                                                                                                                                        | <b>C:</b> 55.31/55.38; <b>H:</b> 6.03/6.19;<br><b>N:</b> 4.96/4.70   |
| <b>33</b> | 3252 (m, N-H)                    | 7.03 (d, 4H, J <sub>3-2</sub> =J <sub>5-6</sub> =7.1, A+A', H <sub>3</sub> +H <sub>5</sub> ); 7.43                                                                                                                                                                                                                                                                                                                                                                                                             | 121.6 (4C, A+A', C <sub>3</sub> +C <sub>5</sub> ); 126.0 (2C, A+A', C <sub>1</sub> ); 127.9                                                                                                                                                                                                                                                                                                                                                                                                 | <b>C:</b> 34.80/35.27; <b>H:</b> 2.36/2.32;                          |

|           |                                                                 |                                                                                                                                                                                                                                                                                                                                                                          |                                                                                                                                                                                                                                                                                                                                                                                              |                                                                    |
|-----------|-----------------------------------------------------------------|--------------------------------------------------------------------------------------------------------------------------------------------------------------------------------------------------------------------------------------------------------------------------------------------------------------------------------------------------------------------------|----------------------------------------------------------------------------------------------------------------------------------------------------------------------------------------------------------------------------------------------------------------------------------------------------------------------------------------------------------------------------------------------|--------------------------------------------------------------------|
|           | 1160 (s, SO <sub>2</sub> ),<br>816 (w, Se-Se)                   | (d, 4H, $J_{2,3}=J_{6,5}=7.1$ , A+A', H <sub>2</sub> +H <sub>6</sub> ); 7.67 (d, 4H, $J_{3,2}=J_{5,6}=7.3$ , B+B', H <sub>3</sub> +H <sub>5</sub> ); 7.78 (d, 4H, $J_{2,3}=J_{HF-HF}=7.3$ , B+B', H <sub>2</sub> +H <sub>6</sub> ); 10.36 (s, 2H, 2NH)                                                                                                                   | (2C, B+B', C <sub>4</sub> ); 129.5 (4C, B+B', C <sub>2</sub> +C <sub>6</sub> ); 133.3 (4C, B+B', C <sub>3</sub> +C <sub>5</sub> ); 134.0 (4C, A+A', C <sub>2</sub> +C <sub>6</sub> ); 138.4 (2C, A+A', C <sub>4</sub> ); 139.4 (2C, B+B', C <sub>1</sub> )                                                                                                                                   | <b>N:</b> 3.26/3.42                                                |
| <b>34</b> | 3254 (m, N-H),<br>1158 (s, SO <sub>2</sub> ),<br>806 (w, Se-Se) | 7.02 (d, 4H, $J_{3,2}=J_{5,6}=8.6$ , A+A', H <sub>3</sub> +H <sub>5</sub> ); 7.43 (d, 4H, $J_{2,3}=J_{6,5}=8.6$ , A+A', H <sub>2</sub> +H <sub>6</sub> ); 7.63 (d, 4H, $J_{3,2}=J_{5,6}=8.5$ , B+B', H <sub>3</sub> +H <sub>5</sub> ); 7.75 (d, 4H, $J_{2,3}=J_{6,5}=8.5$ , B+B', H <sub>2</sub> +H <sub>6</sub> ); 10.57 (s, 2H, 2NH)                                   | 121.8 (4C, A+A', C <sub>3</sub> +C <sub>5</sub> ); 125.9 (2C, A+A', C <sub>1</sub> ); 129.5 (4C, B+B', C <sub>2</sub> +C <sub>6</sub> ); 130.4 (4C, B+B', C <sub>3</sub> +C <sub>5</sub> ); 134.1 (4C, A+A', C <sub>2</sub> +C <sub>6</sub> ); 138.4 (2C, B+B', C <sub>4</sub> ); 138.6 (2C, A+A', C <sub>4</sub> ); 138.9 (2C, B+B', C <sub>1</sub> )                                       | <b>C:</b> 41.68/41.46; <b>H:</b> 2.60/2.68;<br><b>N:</b> 4.05/3.96 |
| <b>35</b> | 3279 (m, N-H),<br>1164 (s, SO <sub>2</sub> ),<br>814 (w, Se-Se) | 7.01 (d, 4H, $J_{3,2}=J_{5,6}=8.6$ , A+A', H <sub>3</sub> +H <sub>5</sub> ); 7.36 (d, 4H, $J_{2,3}=J_{6,5}=8.6$ , A+A', H <sub>2</sub> +H <sub>6</sub> ); 7.62 (d, 2H, $J_{3,4}=3.7$ , B+B', H <sub>3</sub> ); 8.05 (d, 4H, $J_{6,5}=7.8$ , B+B', H <sub>6</sub> ); 10.82 (s, 2H, 2NH)                                                                                   | 120.5 (4C, A+A', C <sub>3</sub> +C <sub>5</sub> ); 125.4 (2C, A+A', C <sub>1</sub> ); 128.6 (2C, B+B', C <sub>5</sub> ); 131.5 (2C, B+B', C <sub>6</sub> ); 132.5 (2C, B+B', C <sub>3</sub> ); 132.8 (2C, B+B', C <sub>2</sub> ); 134.2 (4C, A+A', C <sub>2</sub> +C <sub>6</sub> ); 135.7 (2C, B+B', C <sub>4</sub> ); 137.1 (2C, A+A', C <sub>4</sub> ); 138.2 (2C, B+B', C <sub>1</sub> ) | <b>C:</b> 41.68/41.61; <b>H:</b> 2.60/3.01;<br><b>N:</b> 4.05/3.71 |
| <b>36</b> | 3279 (m, N-H),<br>1157 (s, SO <sub>2</sub> ),<br>816 (w, Se-Se) | 7.03 (d, 4H, $J_{3,2}=J_{5,6}=8.6$ , A+A', H <sub>3</sub> +H <sub>5</sub> ); 7.37-7.43 (m, 8H, A+A', H <sub>2</sub> +H <sub>6</sub> , B+B', H <sub>3</sub> +H <sub>5</sub> ); 7.82 (m, 4H, B+B', H <sub>2</sub> +H <sub>6</sub> ); 10.52 (s, 2H, 2NH)                                                                                                                    | 116.8 (4C, B+B', C <sub>3</sub> +C <sub>5</sub> ); 122.1 (4C, A+A', C <sub>3</sub> +C <sub>5</sub> ); 125.8 (2C, A+A', C <sub>1</sub> ); 130.7 (4C, B+B', C <sub>2</sub> +C <sub>6</sub> ); 133.6 (4C, A+A', C <sub>2</sub> +C <sub>6</sub> ); 136.5 (2C, B+B', C <sub>1</sub> ); 138.6 (2C, A+A', C <sub>4</sub> ); 166.5 (2C, B+B', C <sub>4</sub> )                                       | <b>C:</b> 43.76/43.31; <b>H:</b> 2.73/2.83;<br><b>N:</b> 4.25/4.21 |
| <b>37</b> | 3237 (s, N-H),<br>1160 (s, SO <sub>2</sub> ),<br>816 (m, Se-Se) | 7.03 (d, 4H, $J_{3,2}=J_{5,6}=7.9$ , A+A', H <sub>3</sub> +H <sub>5</sub> ); 7.37-7.44 (m, 8H, A+A', H <sub>2</sub> +H <sub>6</sub> , B+B', H <sub>3</sub> +H <sub>5</sub> ); 7.67-7.71 (m, 2H, B+B', H <sub>4</sub> ); 7.82-7.87 (m, 2H, B+B', H <sub>6</sub> ); 10.82 (s, 2H, 2NH)                                                                                     | 118.1 (2C, B+B', C <sub>3</sub> ); 120.9 (4C, A+A', C <sub>3</sub> +C <sub>5</sub> ); 125.7 (2C, A+A', C <sub>1</sub> ); 127.6 (2C, B+B', C <sub>5</sub> ); 131.3 (2C, B+B', C <sub>1</sub> ); 134.1 (4C, A+A', C <sub>2</sub> +C <sub>6</sub> ); 137.0 (2C, B+B', C <sub>6</sub> ); 138.2 (2C, A+A', C <sub>4</sub> ); 157.7 (2C, B+B', C <sub>4</sub> ); 160.2 (2C, B+B', C <sub>2</sub> ) | <b>C:</b> 43.76/44.23; <b>H:</b> 2.74/3.20;<br><b>N:</b> 4.25/4.23 |
| <b>38</b> | 3251 (s, N-H),<br>1156 (s, SO <sub>2</sub> ),<br>822 (m, Se-Se) | 3.79 (s, 6H, 2OCH <sub>3</sub> ); 7.02 (d, 4H, $J_{3,2}=J_{5,6}=8.7$ , A+A', H <sub>3</sub> +H <sub>5</sub> ); 7.05 (d, 4H, $J_{3,2}=J_{5,6}=9.0$ , B+B', H <sub>3</sub> +H <sub>5</sub> ); 7.40 (d, 4H, $J_{2,3}=J_{6,5}=8.7$ , A+A', H <sub>2</sub> +H <sub>6</sub> ); 7.70 (d, 4H, $J_{2,3}=J_{6,5}=9.0$ , B+B', H <sub>2</sub> +H <sub>6</sub> ); 10.36 (s, 2H, 2NH) | 56.5 (1C, OCH <sub>3</sub> ); 115.3 (4C, B+B', C <sub>3</sub> +C <sub>5</sub> ); 121.0 (4C, A+A', C <sub>3</sub> +C <sub>5</sub> ); 125.3 (2C, A+A', C <sub>1</sub> ); 129.7 (4C, B+B', C <sub>2</sub> +C <sub>6</sub> ); 131.7 (2C, B+B', C <sub>1</sub> ); 134.1 (4C, A+A', C <sub>2</sub> +C <sub>6</sub> ); 139.0 (2C, A+A', C <sub>4</sub> ); 163.4 (2C, B+B', C <sub>4</sub> )         | <b>C:</b> 45.75/45.36; <b>H:</b> 3.52/3.82;<br><b>N:</b> 4.10/3.75 |
| <b>39</b> | 3268 (s, N-H),<br>1164 (s, SO <sub>2</sub> ),<br>835 (m, Se-Se) | 7.05 (d, 4H, $J_{3,2}=J_{5,6}=8.7$ , A+A', H <sub>3</sub> +H <sub>5</sub> ); 7.45 (d, 4H, $J_{2,3}=J_{6,5}=8.7$ , A+A', H <sub>2</sub> +H <sub>6</sub> ); 8.00 (d, 4H, $J_{2,3}=J_{6,5}=8.9$ , B+B', H <sub>2</sub> +H <sub>6</sub> ); 8.37 (d, 4H, $J_{3,2}=J_{5,6}=8.9$ , B+B', H <sub>3</sub> +H <sub>5</sub> ); 10.81 (s, 2H, 2NH)                                   | 121.7 (4C, A+A', C <sub>3</sub> +C <sub>5</sub> ); 125.6 (2C, A+A', C <sub>1</sub> ); 128.4 (4C, B+B', C <sub>3</sub> +C <sub>5</sub> ); 129.1 (4C, B+B', C <sub>2</sub> +C <sub>6</sub> ); 133.9 (4C, A+A', C <sub>2</sub> +C <sub>6</sub> ); 137.9 (2C, A+A', C <sub>4</sub> ); 145.5 (2C, B+B', C <sub>1</sub> ); 150.8 (2C, B+B', C <sub>4</sub> )                                       | <b>C:</b> 40.45/40.62; <b>H:</b> 2.53/2.78;<br><b>N:</b> 7.87/7.90 |
| <b>40</b> | 3251 (s, N-H),<br>1159 (s, SO <sub>2</sub> ),<br>834 (m, Se-Se) | 7.03 (d, 4H, $J_{3,2}=J_{5,6}=8.5$ , A+A', H <sub>3</sub> +H <sub>5</sub> ); 7.44 (d, 4H, $J_{2,3}=J_{6,5}=8.5$ , A+A', H <sub>2</sub> +H <sub>6</sub> ); 7.92 (d, 4H, $J_{3,2}=J_{5,6}=8.4$ , B+B', H <sub>3</sub> +H <sub>5</sub> ); 8.05 (d, 4H, $J_{2,3}=J_{6,5}=8.4$ , B+B', H <sub>2</sub> +H <sub>6</sub> ); 10.76 (s, 2H, 2NH)                                   | 116.4 (2C, B+B', C <sub>4</sub> ); 118.3 (2C, CN); 121.6 (4C, A+A', C <sub>3</sub> +C <sub>5</sub> ); 126.3 (2C, A+A', C <sub>1</sub> ); 128.3 (4C, B+B', C <sub>2</sub> +C <sub>6</sub> ); 133.9 (4C, A+A', C <sub>2</sub> +C <sub>6</sub> ); 134.4 (4C, B+B', C <sub>3</sub> +C <sub>5</sub> ); 138.0 (2C, A+A', C <sub>4</sub> ); 144.2 (2C, B+B', C <sub>1</sub> )                       | <b>C:</b> 45.20/45.33; <b>H:</b> 2.75/2.74;<br><b>N:</b> 8.11/7.90 |
| <b>41</b> | 3238 (s, N-H),                                                  | 7.02 (d, 4H, $J_{3,2}=J_{5,6}=8.6$ , A+A', H <sub>3</sub> +H <sub>5</sub> ); 7.38                                                                                                                                                                                                                                                                                        | 121.1 (4C, A+A', C <sub>3</sub> +C <sub>5</sub> ); 125.6 (2C, A+A', C <sub>1</sub> ); 127.5                                                                                                                                                                                                                                                                                                  | <b>C:</b> 46.30/46.21; <b>H:</b> 3.21/3.62;                        |

|           |                                                                 |                                                                                                                                                                                                                                                                                                                                                                                                                                                                                                                                       |                                                                                                                                                                                                                                                                                                                                                                                                                                                                                                                                                                                                                                                                                                                                                                    |                                                                      |
|-----------|-----------------------------------------------------------------|---------------------------------------------------------------------------------------------------------------------------------------------------------------------------------------------------------------------------------------------------------------------------------------------------------------------------------------------------------------------------------------------------------------------------------------------------------------------------------------------------------------------------------------|--------------------------------------------------------------------------------------------------------------------------------------------------------------------------------------------------------------------------------------------------------------------------------------------------------------------------------------------------------------------------------------------------------------------------------------------------------------------------------------------------------------------------------------------------------------------------------------------------------------------------------------------------------------------------------------------------------------------------------------------------------------------|----------------------------------------------------------------------|
|           | 1160 (s, SO <sub>2</sub> ),<br>820 (m, Se-Se)                   | (d, 4H, $J_{2,3}=J_{6,5}=8.6$ , A+A', H <sub>2</sub> +H <sub>6</sub> ); 7.56 (t, 4H, B+B', H <sub>3</sub> +H <sub>5</sub> ); 7.61 (dd, 2H, $J_{4,3}=7.4$ , $J_{4,2}=1.2$ , B+B', H <sub>4</sub> ); 7.77 (dd, 4H, $J_{2,3}=J_{6,5}=7.4$ , $J_{2,4}=J_{6,4}=1.2$ , B+B', H <sub>2</sub> +H <sub>6</sub> ); 10.50 (s, 2H, 2NH)                                                                                                                                                                                                           | (4C, B+B', C <sub>2</sub> +C <sub>6</sub> ); 130.2 (4C, B+B', C <sub>3</sub> +C <sub>5</sub> ); 133.9 (4C, A+A', C <sub>2</sub> +C <sub>6</sub> ); 134.2 (2C, B+B', C <sub>4</sub> ); 138.8 (2C, A+A', C <sub>4</sub> ); 140.1 (2C, B+B', C <sub>1</sub> )                                                                                                                                                                                                                                                                                                                                                                                                                                                                                                         | <b>N:</b> 4.50/4.46                                                  |
| <b>42</b> | 3256 (s, N-H),<br>1161 (s, SO <sub>2</sub> ),<br>840 (m, Se-Se) | 7.04 (d, 4H, , $J_{3,2}=J_{5,6}=8.3$ , A+A', H <sub>3</sub> +H <sub>5</sub> ); 7.44 (d, 4H, $J_{2,3}=J_{6,5}=8.3$ , A+A', H <sub>2</sub> +H <sub>6</sub> ); 7.96 (s, 8H, B+B', H <sub>2</sub> +H <sub>3</sub> +H <sub>5</sub> +H <sub>6</sub> ); 10.72 (s, 2H, 2NH)                                                                                                                                                                                                                                                                   | 121.5 (4C, A+A', C <sub>3</sub> +C <sub>5</sub> ); 122.8 (2C, CF <sub>3</sub> ); 125.5 (2C, A+A', C <sub>1</sub> ); 126.2 (4C, B+B', C <sub>3</sub> +C <sub>5</sub> ); 127.5 (4C, B+B', C <sub>2</sub> +C <sub>6</sub> ); 128.5 (2C, B+B', C <sub>4</sub> ); 134.1 (4C, A+A', C <sub>2</sub> +C <sub>6</sub> ); 138.2 (2C, A+A', C <sub>4</sub> ); 144.1 (2C, B+B', C <sub>1</sub> )                                                                                                                                                                                                                                                                                                                                                                               | <b>C:</b> 41.16/41.46; <b>H:</b> 2.37/2.53;<br><b>N:</b> 3.69/3.48   |
| <b>43</b> | 3235 (s, N-H),<br>1159 (s, SO <sub>2</sub> ),<br>812 (m, Se-Se) | 2.33 (s, 6H, 2CH <sub>3</sub> ); 7.02 (d, 4H, $J_{3,2}=J_{5,6}=8.7$ , A+A', H <sub>3</sub> +H <sub>5</sub> ); 7.34 (d, 4H, $J_{3,2}=J_{5,6}=8.2$ , B+B', H <sub>3</sub> +H <sub>5</sub> ); 7.38 (d, 4H, $J_{2,3}=J_{6,5}=8.7$ , A+A', H <sub>2</sub> +H <sub>6</sub> ); 7.64 (d, 4H, $J_{2,3}=J_{6,5}=8.2$ , B+B', H <sub>2</sub> +H <sub>6</sub> ); 10.43 (s, 2H, 2NH)                                                                                                                                                               | 21.8 (1C, CH <sub>3</sub> ); 121.1 (4C, A+A', C <sub>3</sub> +C <sub>5</sub> ); 125.4 (2C, A+A', C <sub>1</sub> ); 127.6 (4C, B+B', C <sub>2</sub> +C <sub>6</sub> ); 130.6 (4C, B+B', C <sub>3</sub> +C <sub>5</sub> ); 134.1 (4C, A+A', C <sub>2</sub> +C <sub>6</sub> ); 137.3 (2C, A+A', C <sub>4</sub> ); 138.9 (2C, B+B', C <sub>1</sub> ); 144.3 (2C, B+B', C <sub>4</sub> )                                                                                                                                                                                                                                                                                                                                                                                | <b>C:</b> 48.00/47.77; <b>H:</b> 3.69/4.09;<br><b>N:</b> 4.30/4.20   |
| <b>44</b> | 3249 (s, N-H),<br>1158 (s, SO <sub>2</sub> ),<br>806 (m, Se-Se) | 7.04 (d, 4H, $J_{3,2}=J_{5,6}=8.6$ , A+A', H <sub>3</sub> +H <sub>5</sub> ); 7.33 (d, 4H, $J_{2,3}=J_{6,5}=8.6$ , A+A', H <sub>2</sub> +H <sub>6</sub> ); 7.61-7.68 (m, 4H, B+B', H <sub>4</sub> +H <sub>5</sub> ); 7.75 (dd, 2H, $J_{8,7}=8.0$ , $J_{8,2}=2.0$ , B+B', H <sub>8</sub> ); 7.99 (d, 2H, $J_{7,8}=8.0$ , B+B', H <sub>7</sub> ); 8.09 (dd, 4H, $J_{3,4}=J_{6,5}=13.6$ , $J_{3,5}=J_{6,4}=8.4$ , B+B', H <sub>3</sub> +H <sub>6</sub> ); 8.45 (s, 2H, B+B', H <sub>2</sub> ); 10.59 (s, 2H, 2NH)                         | 120.6 (4C, A+A', C <sub>3</sub> +C <sub>5</sub> ); 122.7 (2C, B+B', C <sub>3</sub> ); 125.8 (2C, A+A', C <sub>1</sub> ); 128.7 (2C, B+B', C <sub>1</sub> ); 129.8 (2C, B+B', C <sub>6</sub> ); 130.0 (2C, B+B', C <sub>9</sub> ); 130.1 (2C, B+B', C <sub>7</sub> ); 130.3 (2C, B+B', C <sub>8</sub> ); 130.5 (2C, B+B', C <sub>4</sub> ); 132.3 (2C, B+B', C <sub>10</sub> ); 133.5 (4C, A+A', C <sub>2</sub> +C <sub>6</sub> ); 134.6 (2C, B+B', C <sub>2</sub> ); 135.1 (2C, B+B', C <sub>5</sub> ); 138.7 (2C, A+A', C <sub>4</sub> )                                                                                                                                                                                                                          | <b>C:</b> 51.87/51.63; <b>H:</b> 3.37/3.77;<br><b>N:</b> 3.78/3.96   |
| <b>45</b> | 3268 (s, N-H),<br>1164 (s, SO <sub>2</sub> ),<br>835 (m, Se-Se) | 6.95 (d, 4H, $J_{3,2}=J_{5,6}=8.5$ , A+A', H <sub>3</sub> +H <sub>5</sub> ); 7.17 (d, 4H, $J_{2,3}=J_{6,5}=8.5$ , A+A', H <sub>2</sub> +H <sub>6</sub> ); 7.68-7.72 (m, 4H, B+B', H <sub>6</sub> +H <sub>3</sub> ); 8.27 (dd, 2H, $J_{5,6}=8.2$ , $J_{5,7}=1.3$ , B+B', H <sub>5</sub> ); 8.37 (dd, 2H, $J_{7,6}=7.3$ , $J_{7,5}=1.3$ , B+B', H <sub>7</sub> ); 8.50 (dd, 2H, $J_{4,3}=8.4$ , $J_{4,0}=1.7$ , B+B', H <sub>4</sub> ); 9.11 (dd, 2H, $J_{2,3}=4.2$ , $J_{2,4}=1.7$ , B+B', H <sub>2</sub> ); 10.30 (s, 2H, 2NH)        | 120.2 (2C, B+B', C <sub>3</sub> ); 121.6 (4C, A+A', C <sub>3</sub> +C <sub>5</sub> ); 123.5 (2C, B+B', C <sub>8</sub> ); 125.0 (2C, A+A', C <sub>1</sub> ); 126.5 (2C, B+B', C <sub>7</sub> ); 129.2 (2C, B+B', C <sub>5</sub> ); 133.2 (4C, A+A', C <sub>2</sub> +C <sub>6</sub> ); 134.4 (2C, B+B', C <sub>6</sub> ); 135.8 (2C, B+B', C <sub>4</sub> ); 138.9 (2C, A+A', C <sub>4</sub> ); 143.5 (2C, B+B', C <sub>9</sub> ); 151.9 (2C, B+B', C <sub>10</sub> ); 152.7 (2C, B+B', C <sub>2</sub> )                                                                                                                                                                                                                                                             | <b>C:</b> 49.72/49.56; <b>H:</b> 3.03/3.11;<br><b>N:</b> 7.73/7.69   |
| <b>46</b> | 3250 (s, N-H),<br>1157 (s, SO <sub>2</sub> ),<br>806 (m, Se-Se) | 7.07 (d, 4H, $J_{3,2}=J_{5,6}=8.6$ , A+A', H <sub>3</sub> +H <sub>5</sub> ); 7.43 (d, 4H, $J_{2,3}=J_{6,5}=8.6$ , A+A', H <sub>2</sub> +H <sub>6</sub> ); 7.47 (m, 6H, B <sub>2</sub> +B <sub>2</sub> ', H <sub>3</sub> +H <sub>4</sub> +H <sub>5</sub> ); 7.69 (dd, 4H, $J_{2,3}=J_{6,5}=7.1$ , $J_{2,4}=J_{6,4}=1.5$ , B <sub>2</sub> +B <sub>2</sub> ', H <sub>2</sub> +H <sub>6</sub> ); 7.84-7.87 (m, 8H, B <sub>1</sub> +B <sub>1</sub> ', H <sub>2</sub> +H <sub>3</sub> +H <sub>5</sub> +H <sub>6</sub> ); 10.57 (s, 2H, 2NH) | 121.8 (4C, A+A', C <sub>3</sub> +C <sub>5</sub> ); 125.6 (2C, A+A', C <sub>1</sub> ); 127.9 (4C, B <sub>1</sub> +B <sub>1</sub> ', C <sub>3</sub> +C <sub>5</sub> ); 129.0 (2C, B <sub>2</sub> +B <sub>2</sub> ', C <sub>4</sub> ); 129.4 (4C, B <sub>1</sub> +B <sub>1</sub> ', C <sub>2</sub> +C <sub>6</sub> ); 129.6 (4C, B <sub>2</sub> +B <sub>2</sub> ', C <sub>2</sub> +C <sub>6</sub> ); 130.3 (4C, B <sub>2</sub> +B <sub>2</sub> ', C <sub>3</sub> +C <sub>5</sub> ); 133.7 (4C, A+A', C <sub>2</sub> +C <sub>6</sub> ); 134.6 (2C, B <sub>1</sub> +B <sub>1</sub> ', C <sub>4</sub> ); 138.8 (2C, A+A', C <sub>4</sub> ); 139.0 (2C, B <sub>1</sub> +B <sub>1</sub> ', C <sub>1</sub> ); 145.3 (2C, B <sub>2</sub> +B <sub>2</sub> ', C <sub>1</sub> ) | <b>C:</b> 55.81/55.35; <b>H:</b> 3.62/3.51;<br><b>N:</b> 3.61/3.58   |
| <b>47</b> | 3249 (m, N-H),<br>1145 (s, SO <sub>2</sub> ),<br>825 (m, Se-Se) | 3.80 (s, 6H, N-CH <sub>3</sub> ); 7.02 (s, 2H, B+B', H <sub>4</sub> ), 7.10 (d, 4H, $J_{3,2}=J_{5,6}=8.1$ , A+A', H <sub>3</sub> +H <sub>5</sub> ); 7.41 (s, 2H, B+B', H <sub>5</sub> ); 7.47 (d, 4H, $J_{2,3}=J_{6,5}=8.1$ ,                                                                                                                                                                                                                                                                                                         | 35.4 (2C, N-CH <sub>3</sub> ); 121.5 (4C, A+A', C <sub>3</sub> +C <sub>5</sub> ); 125.8 (2C, A+A', C <sub>1</sub> ); 127.5 (2C, B+B', C <sub>5</sub> ); 128.7 (2C, B+B', C <sub>4</sub> ); 133.9 (4C, A+A', C <sub>2</sub> +C <sub>6</sub> ); 138.2 (2C, A+A', C <sub>4</sub> ); 142.5                                                                                                                                                                                                                                                                                                                                                                                                                                                                             | <b>C:</b> 36.99/36.90; <b>H:</b> 3.15/3.51;<br><b>N:</b> 12.94/12.52 |

|           |                                                                 |                                                                                                                                                                                                                                                                                                                                                                            |                                                                                                                                                                                                                                                                                                                        |                                                                    |
|-----------|-----------------------------------------------------------------|----------------------------------------------------------------------------------------------------------------------------------------------------------------------------------------------------------------------------------------------------------------------------------------------------------------------------------------------------------------------------|------------------------------------------------------------------------------------------------------------------------------------------------------------------------------------------------------------------------------------------------------------------------------------------------------------------------|--------------------------------------------------------------------|
|           |                                                                 | A+A', H <sub>2</sub> +H <sub>6</sub> ); 10.99 (s, 2H, 2NH)                                                                                                                                                                                                                                                                                                                 | (2C, B+B', C <sub>2</sub> )                                                                                                                                                                                                                                                                                            |                                                                    |
| <b>48</b> | 3246 (m, N-H),<br>1154 (s, SO <sub>2</sub> ),<br>814 (w, Se-Se) | 7.08 (d, 4H, $J_{3,2}=J_{5,6}=8.6$ , A+A', H <sub>3</sub> +H <sub>5</sub> ); 7.12 (dd, 2H, $J_{4,3}=4.9$ , $J_{4,5}=3.8$ , B+B', H <sub>4</sub> ); 7.45 (d, 4H, $J_{2,3}=J_{6,5}=8.6$ , A+A', H <sub>2</sub> +H <sub>6</sub> ); 7.56 (dd, 2H, $J_{5,4}=3.8$ , $J_{5,3}=1.3$ , B+B', H <sub>5</sub> ); 7.90 (dd, 2H, $J_{3,4}=4.9$ , $J_{3,5}=1.3$ , B+B', H <sub>3</sub> ) | 121.6 (4C, A+A', C <sub>3</sub> +C <sub>5</sub> ); 126.0 (2C, A+A', C <sub>1</sub> ); 128.5 (2C, B+B', C <sub>5</sub> ); 133.5 (4C, A+A', C <sub>2</sub> +C <sub>6</sub> ); 134.2 (2C, B+B', C <sub>4</sub> ); 134.4 (2C, B+B', C <sub>3</sub> ); 138.6 (2C, A+A', C <sub>4</sub> ); 140.6 (2C, B+B', C <sub>2</sub> ) | <b>C:</b> 37.85/38.02; <b>H:</b> 2.52/2.86;<br><b>N:</b> 4.41/4.09 |

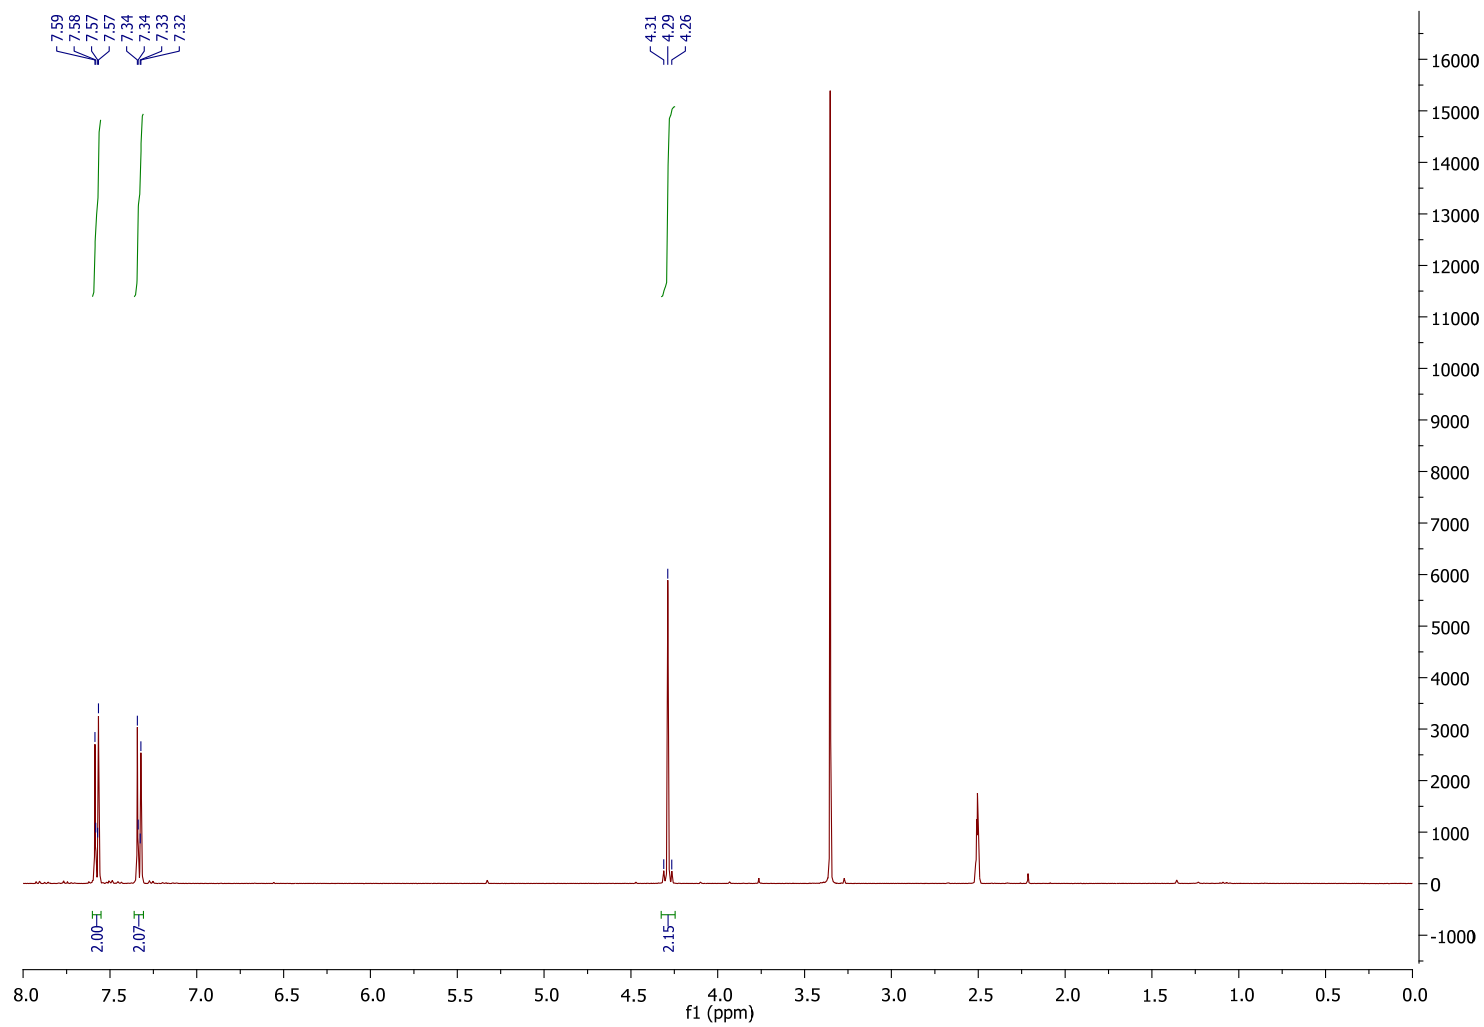

**Figure S1.**  $^1\text{H-NMR}$  spectrum for compound **1**.



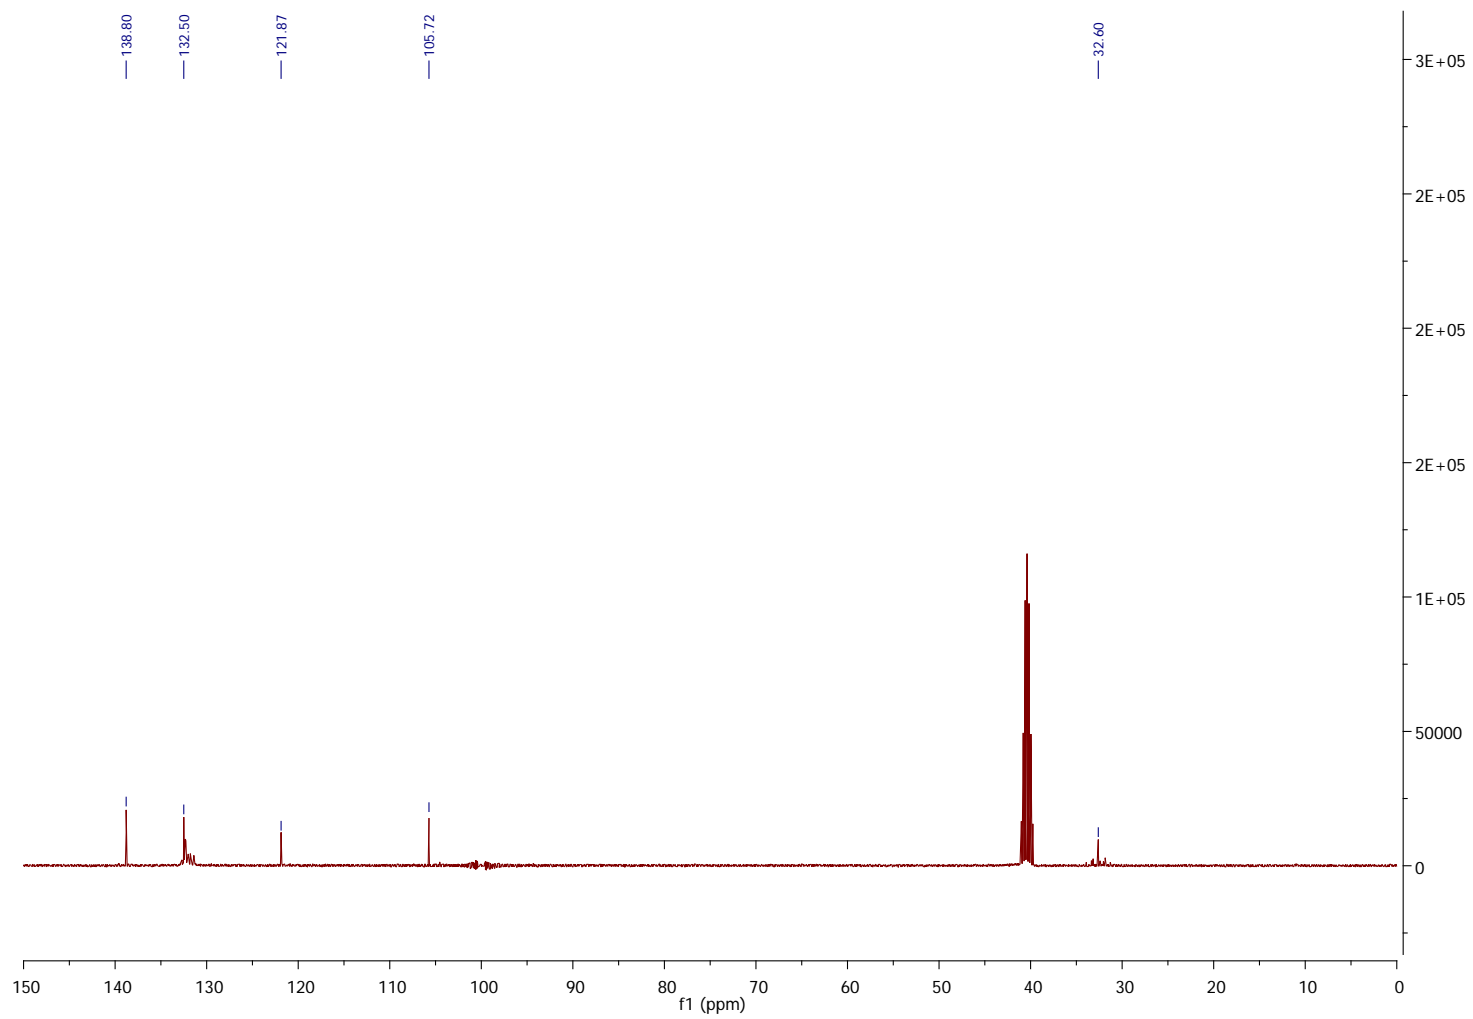

**Figure S2.**  $^{13}\text{C}$ -NMR spectrum for compound **1**.

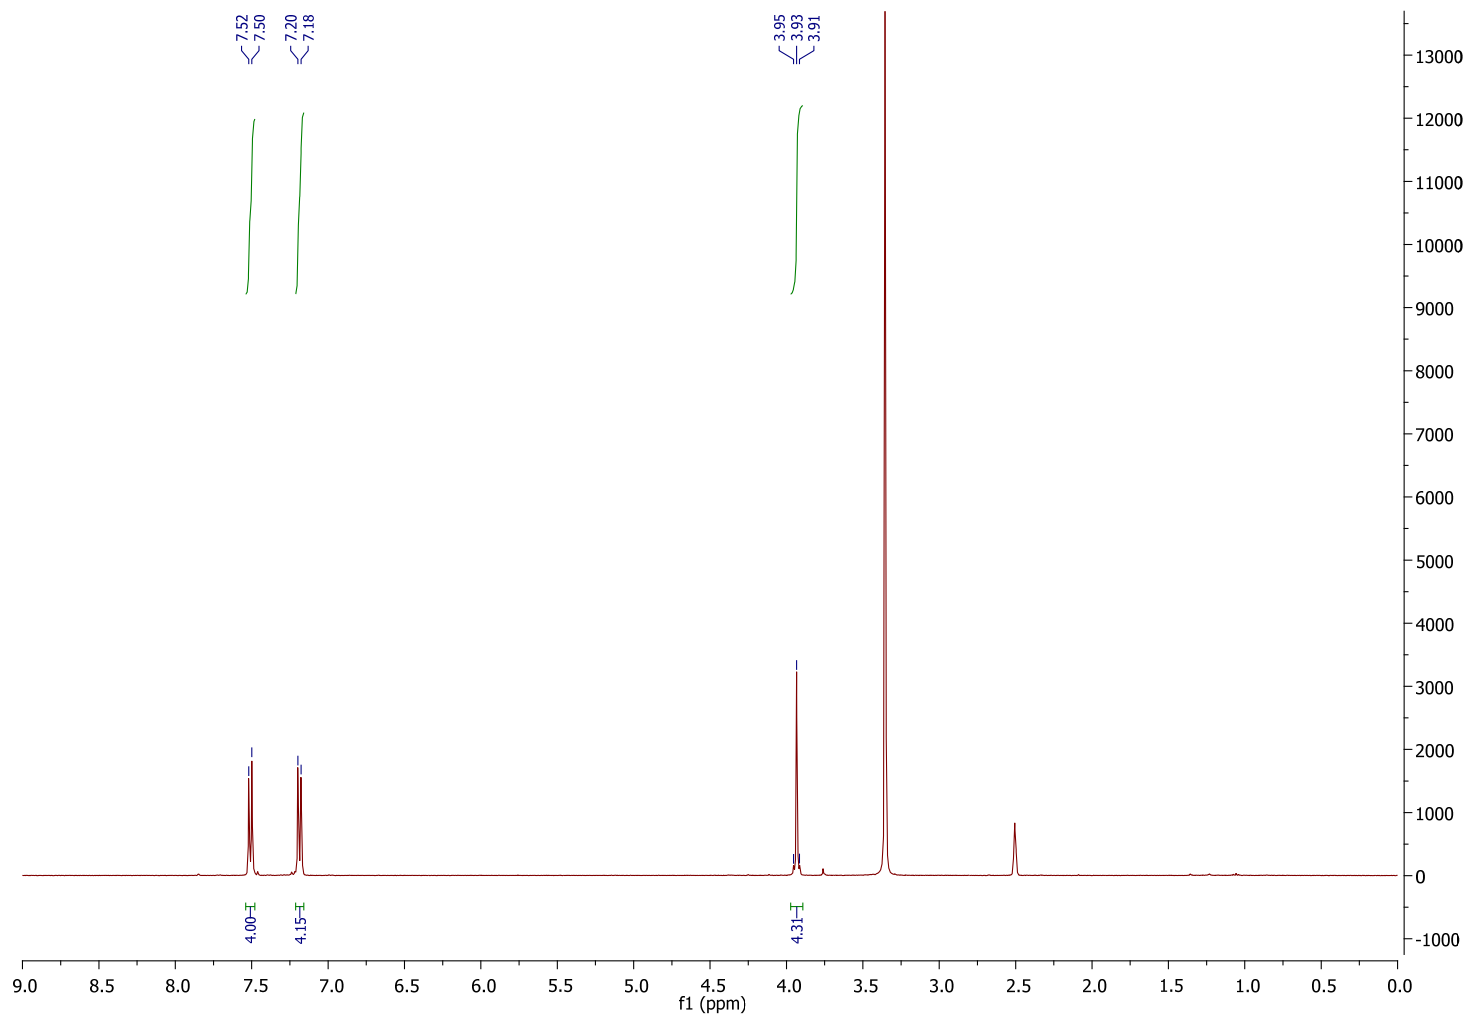

**Figure S3.** <sup>1</sup>H-NMR spectrum for compound **2**.

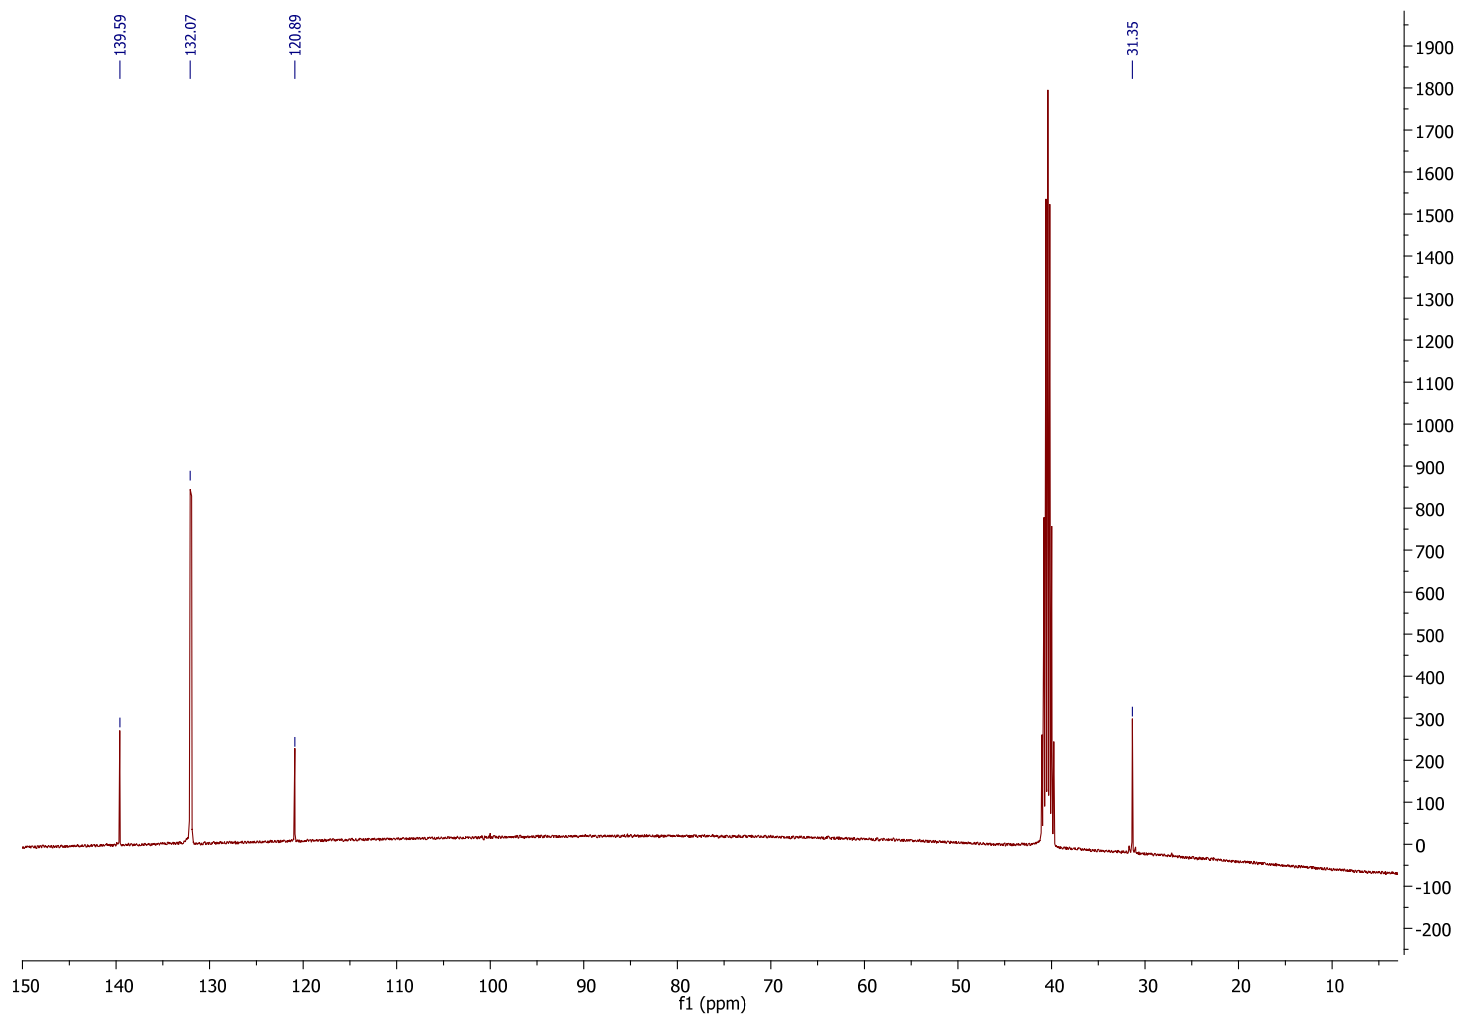

**Figure S4.**  $^{13}\text{C}$ -NMR spectrum for compound 2.

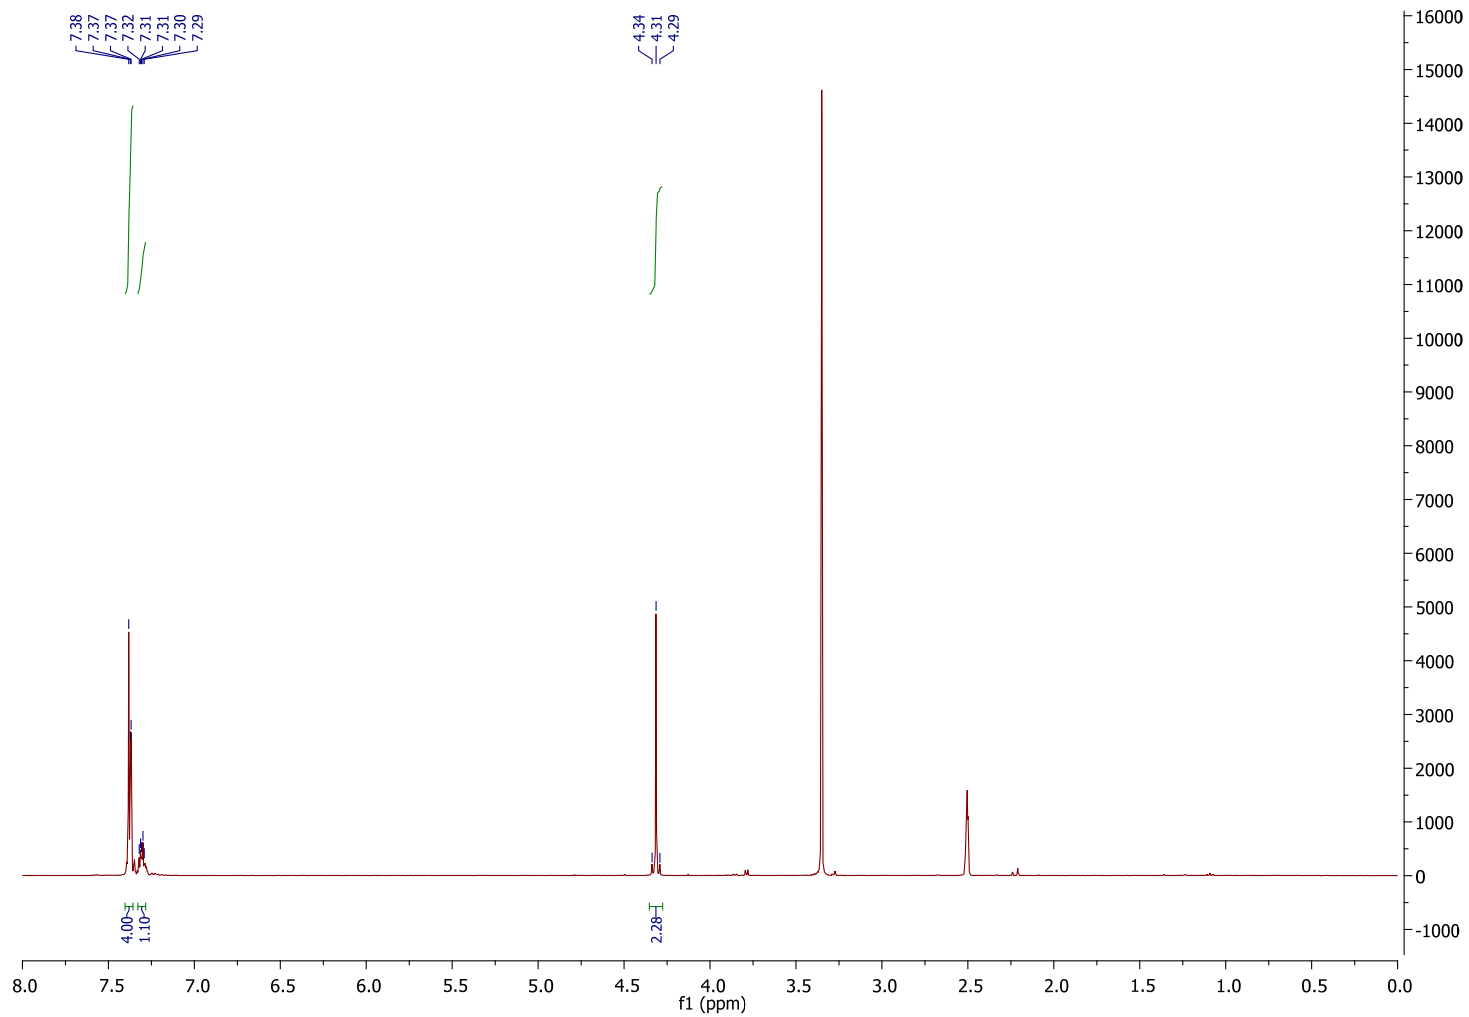

**Figure S5.**  $^1\text{H-NMR}$  spectrum for compound **3**.

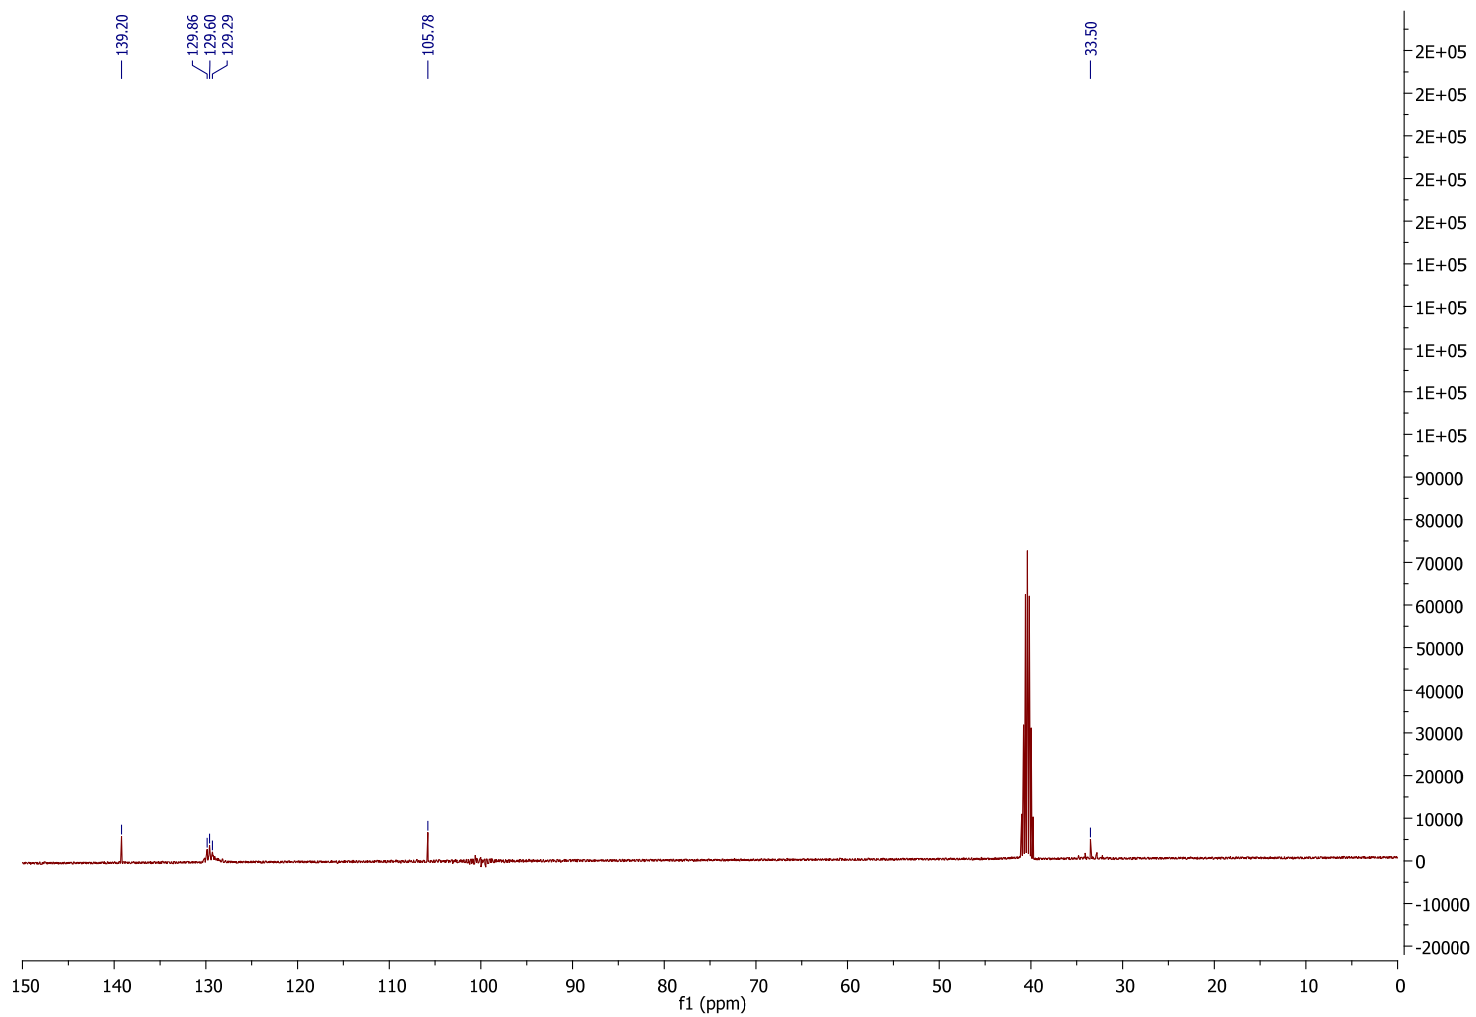

**Figure S6.**  $^{13}\text{C}$ -NMR spectrum for compound 3.

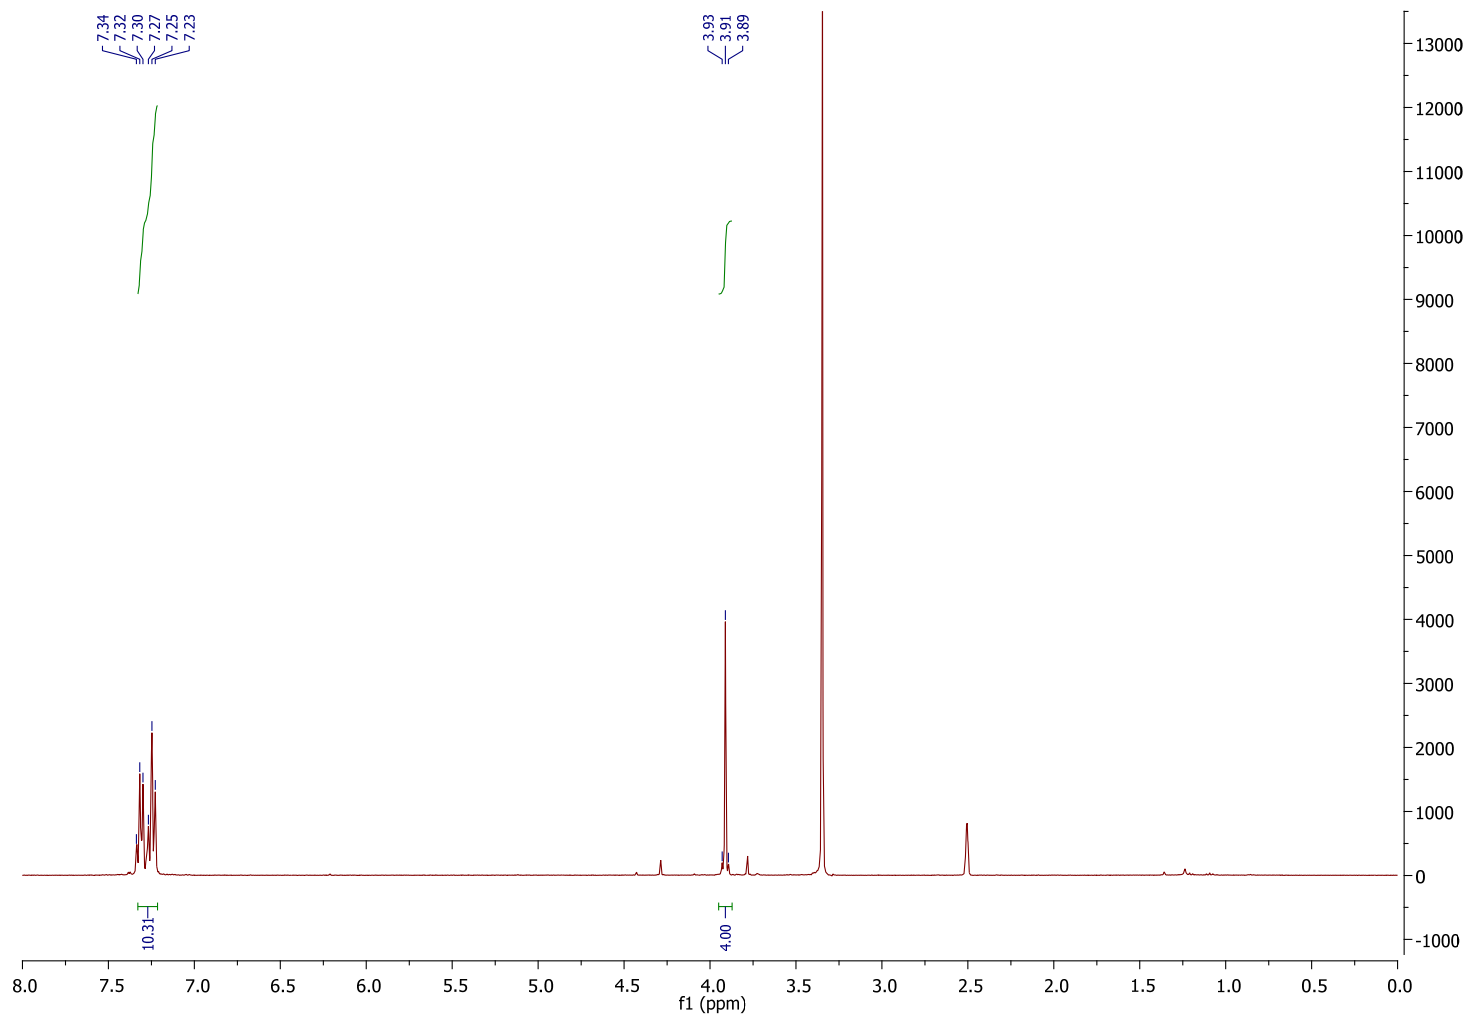

**Figure S7.** <sup>1</sup>H-NMR spectrum for compound **4**.

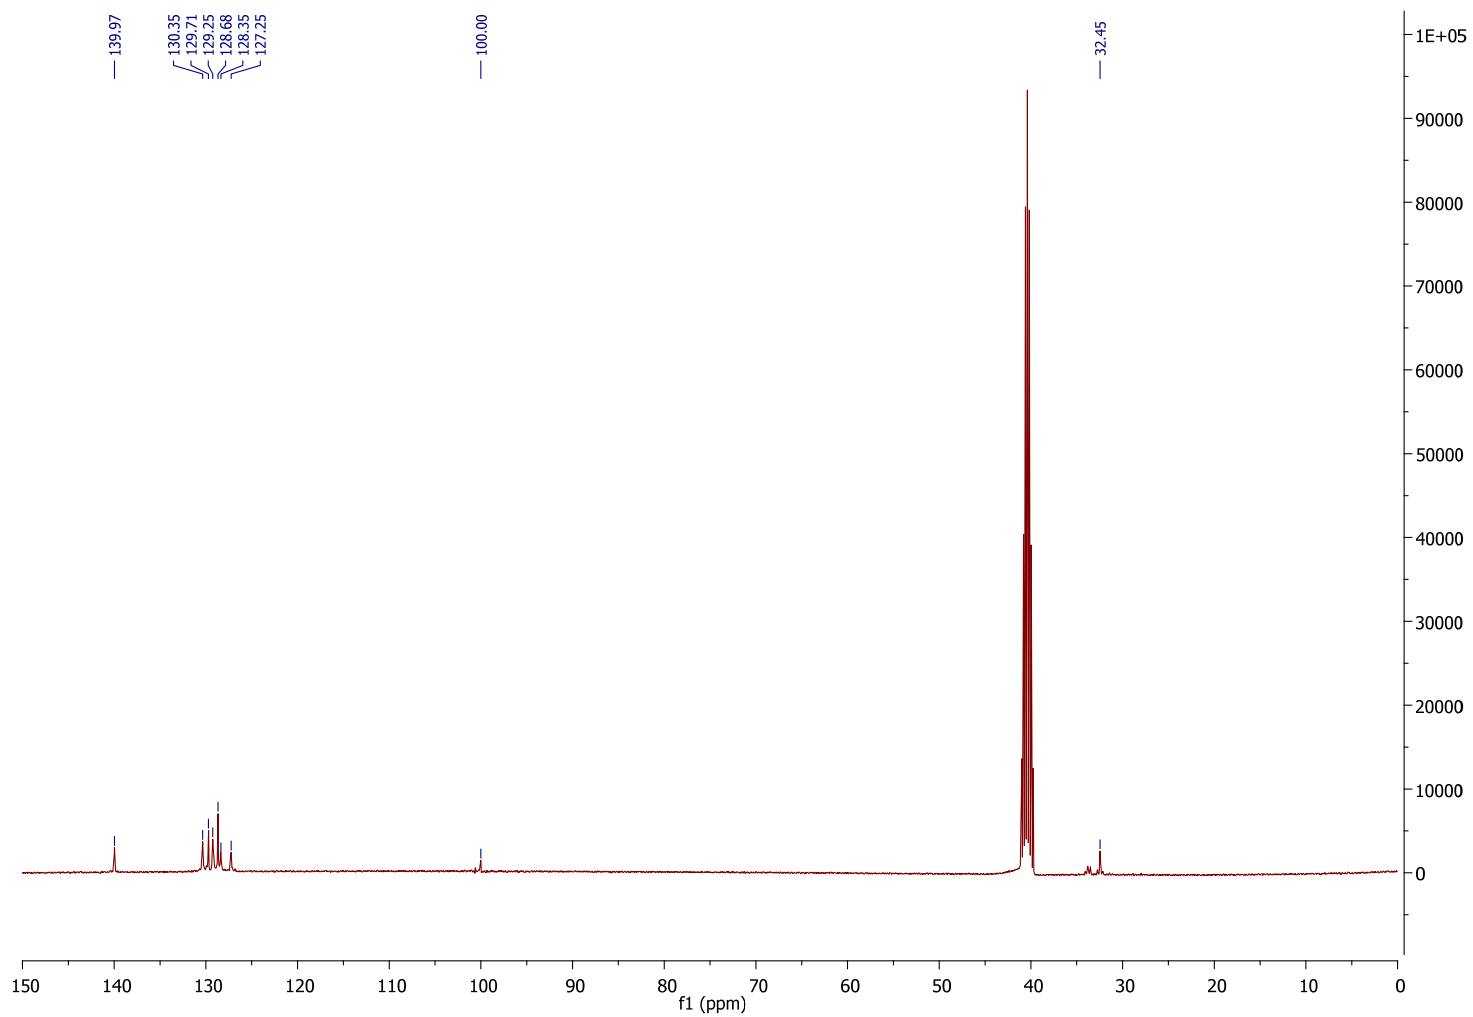

**Figure S8.**  $^{13}\text{C}$ -NMR spectrum for compound **4**.

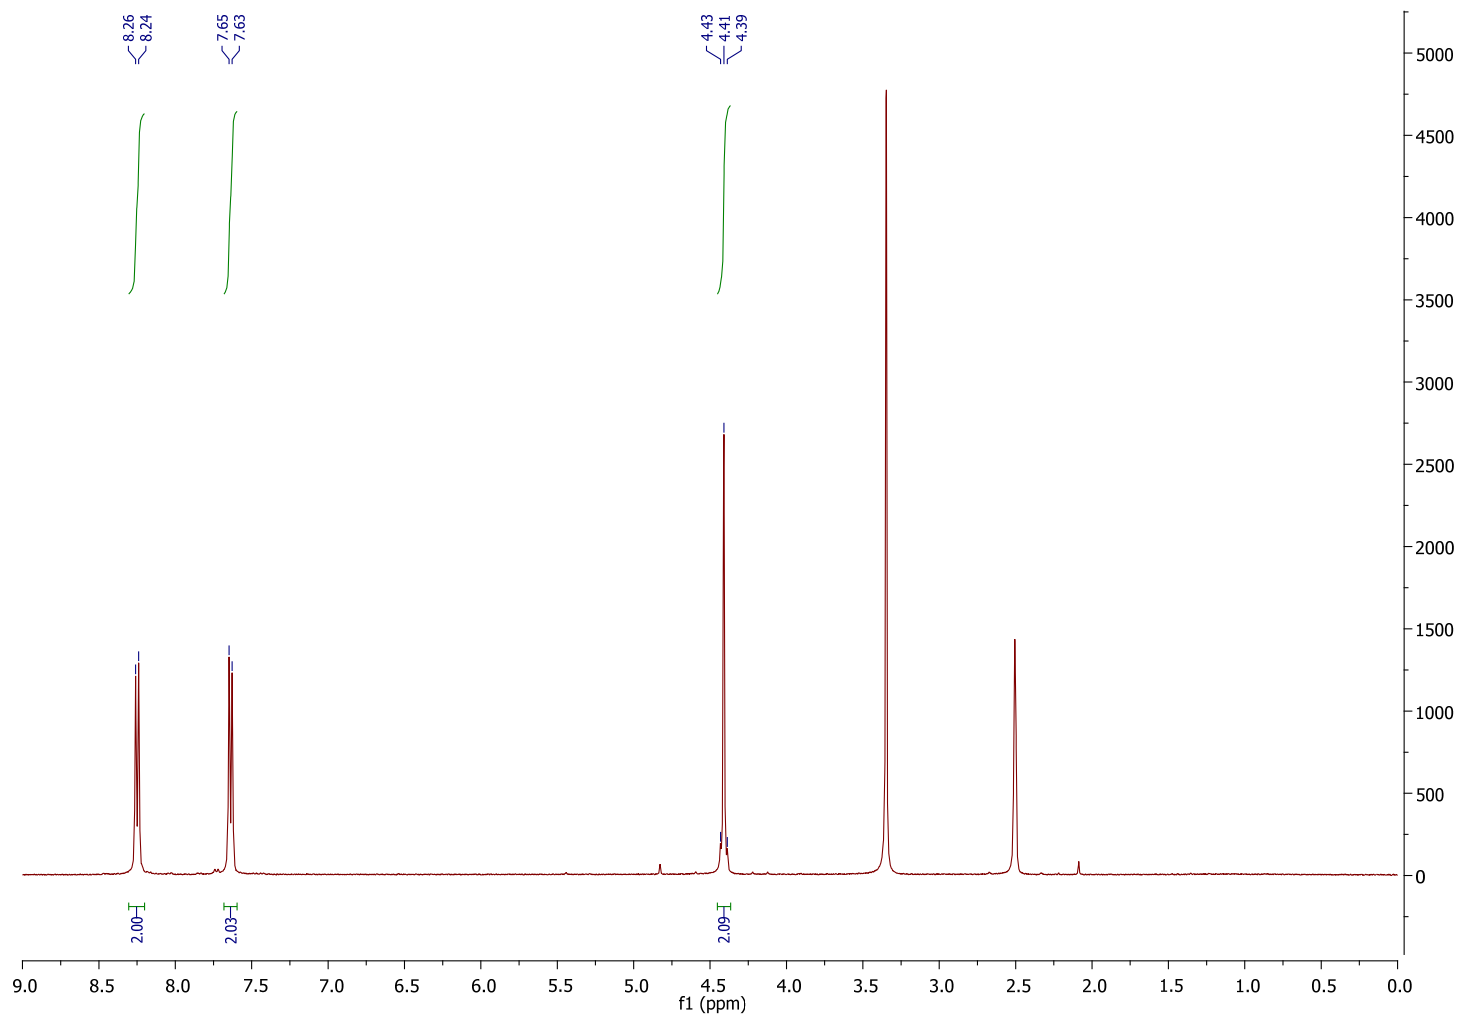

**Figure S9.** <sup>1</sup>H-NMR spectrum for compound **5**.



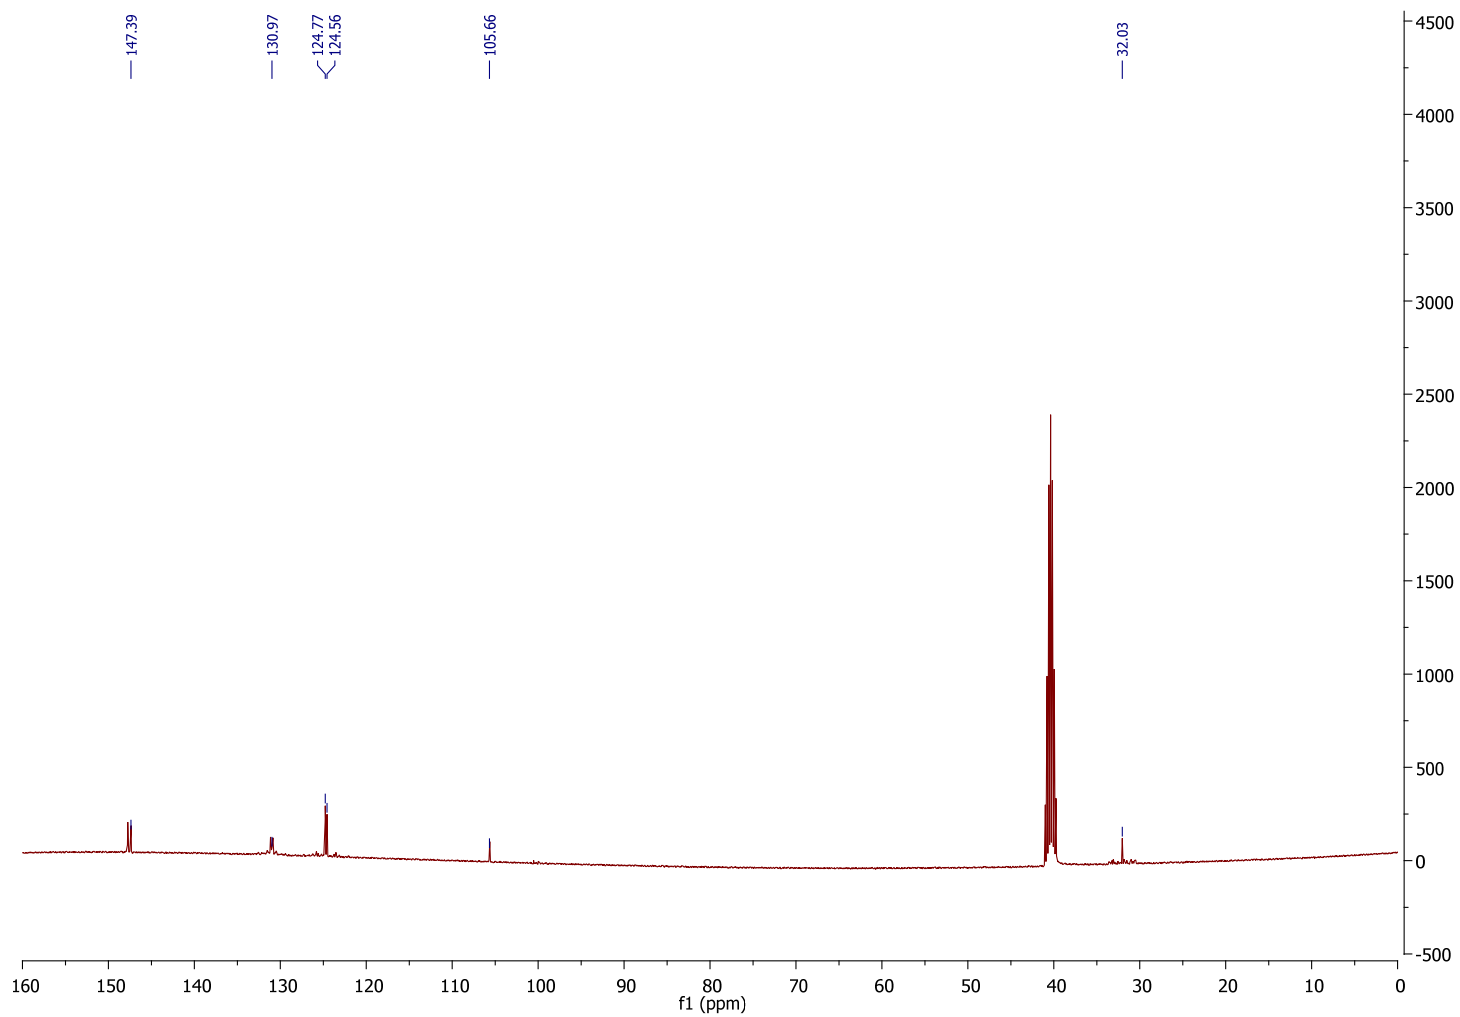

**Figure S10.**  $^{13}\text{C}$ -NMR spectrum for compound 5.

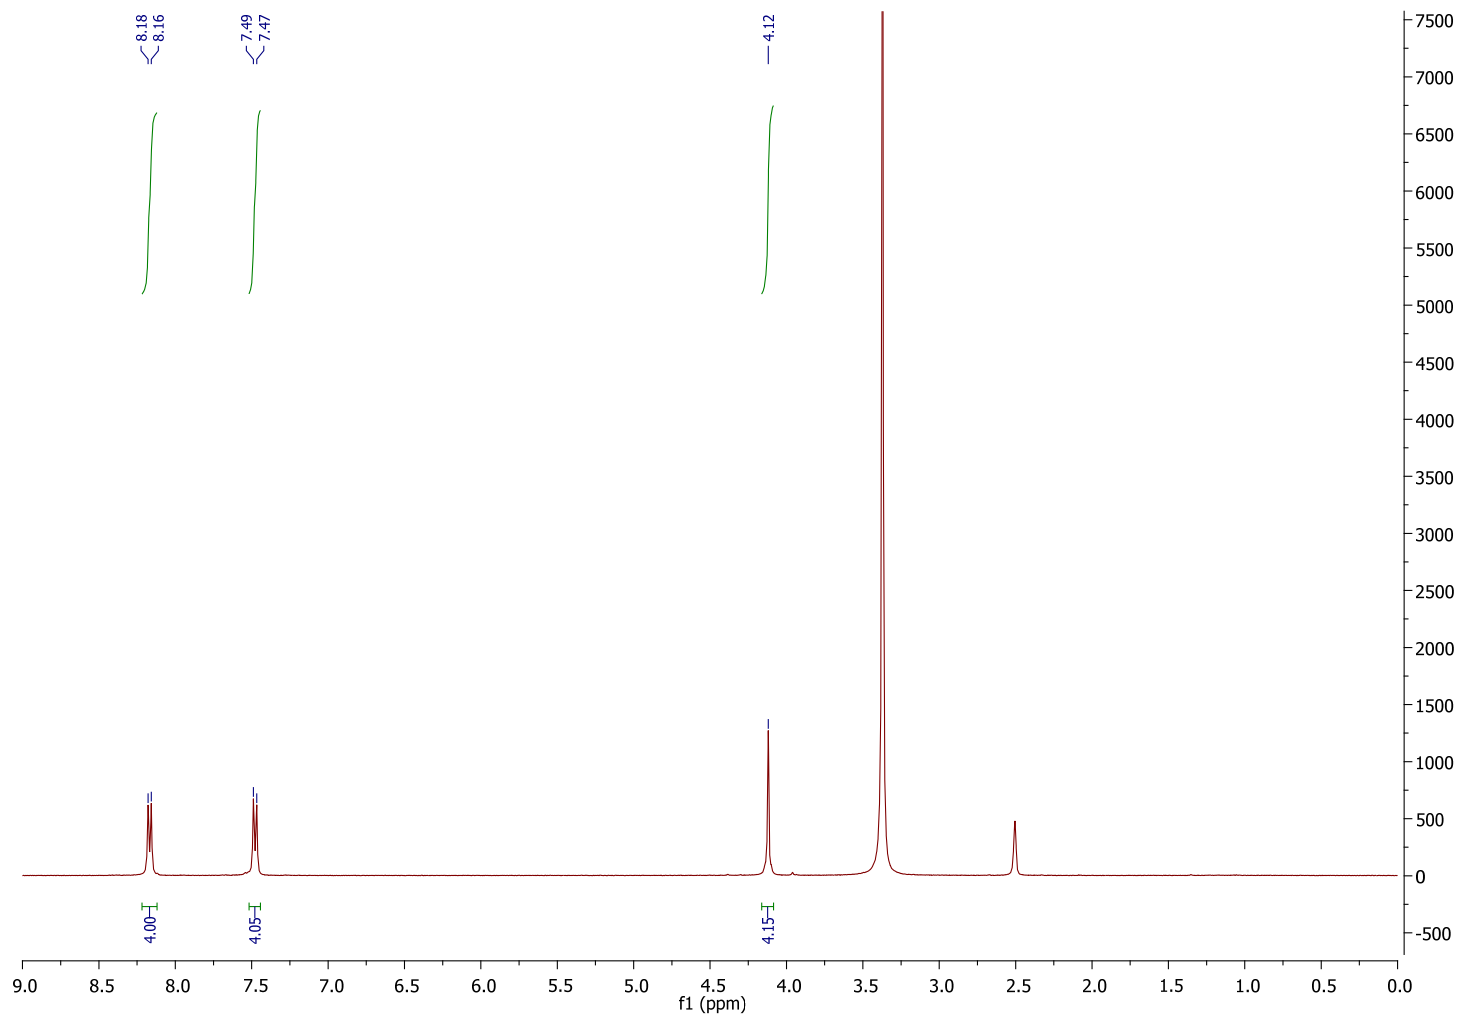

**Figure S11.**  $^1\text{H-NMR}$  spectrum for compound **6**.

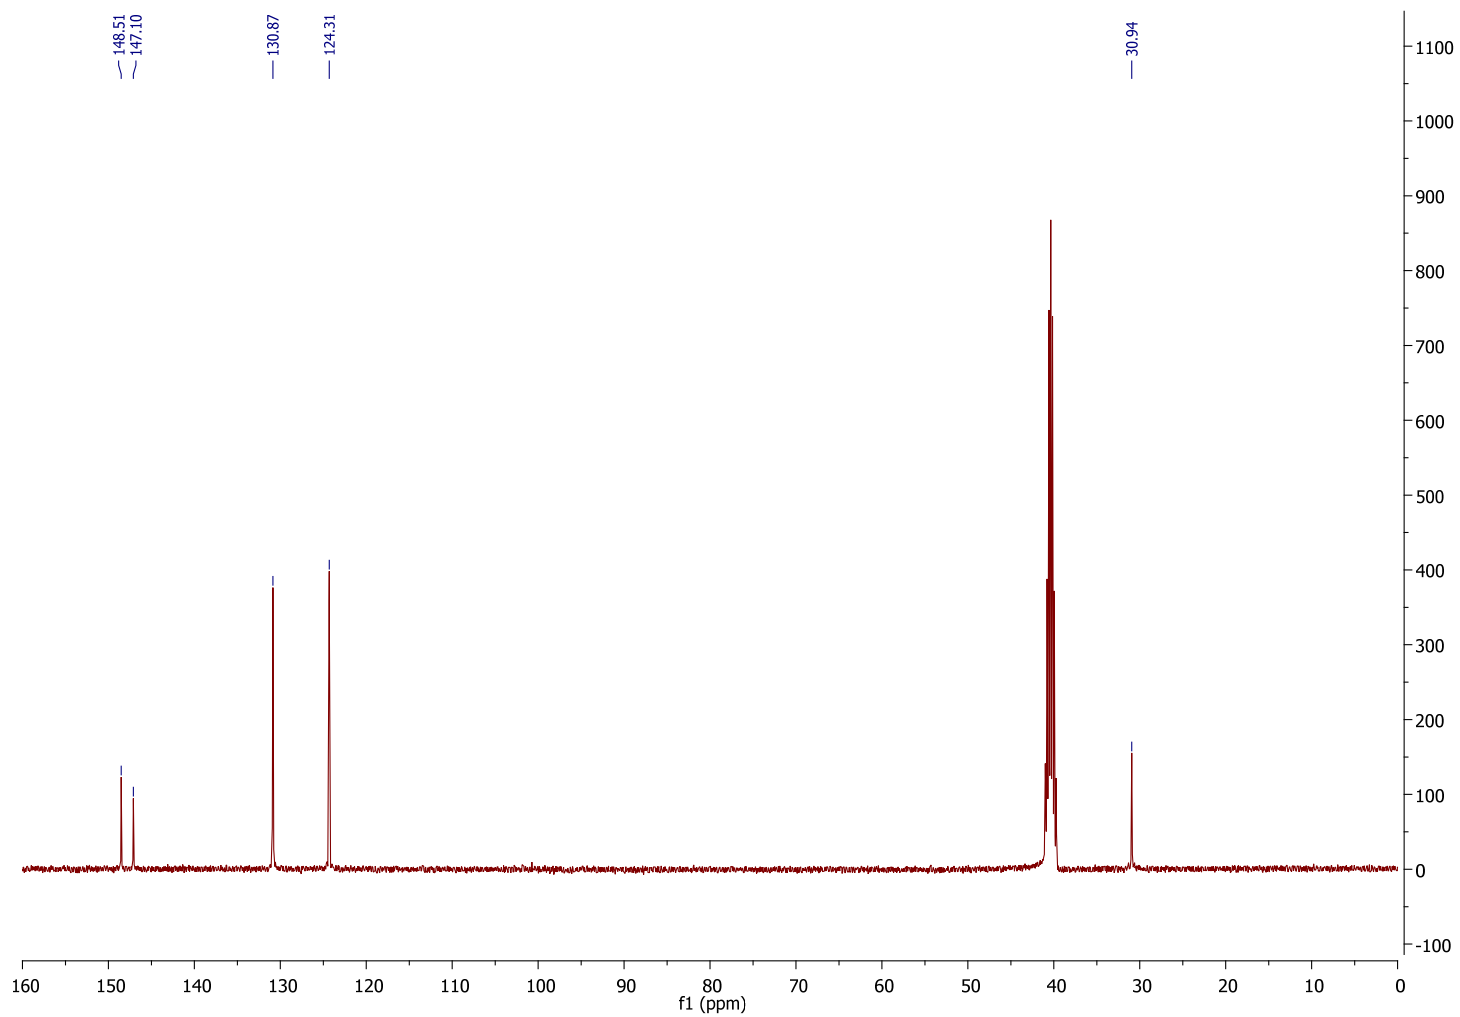

**Figure S12.**  $^{13}\text{C}$ -NMR spectrum for compound **6**.

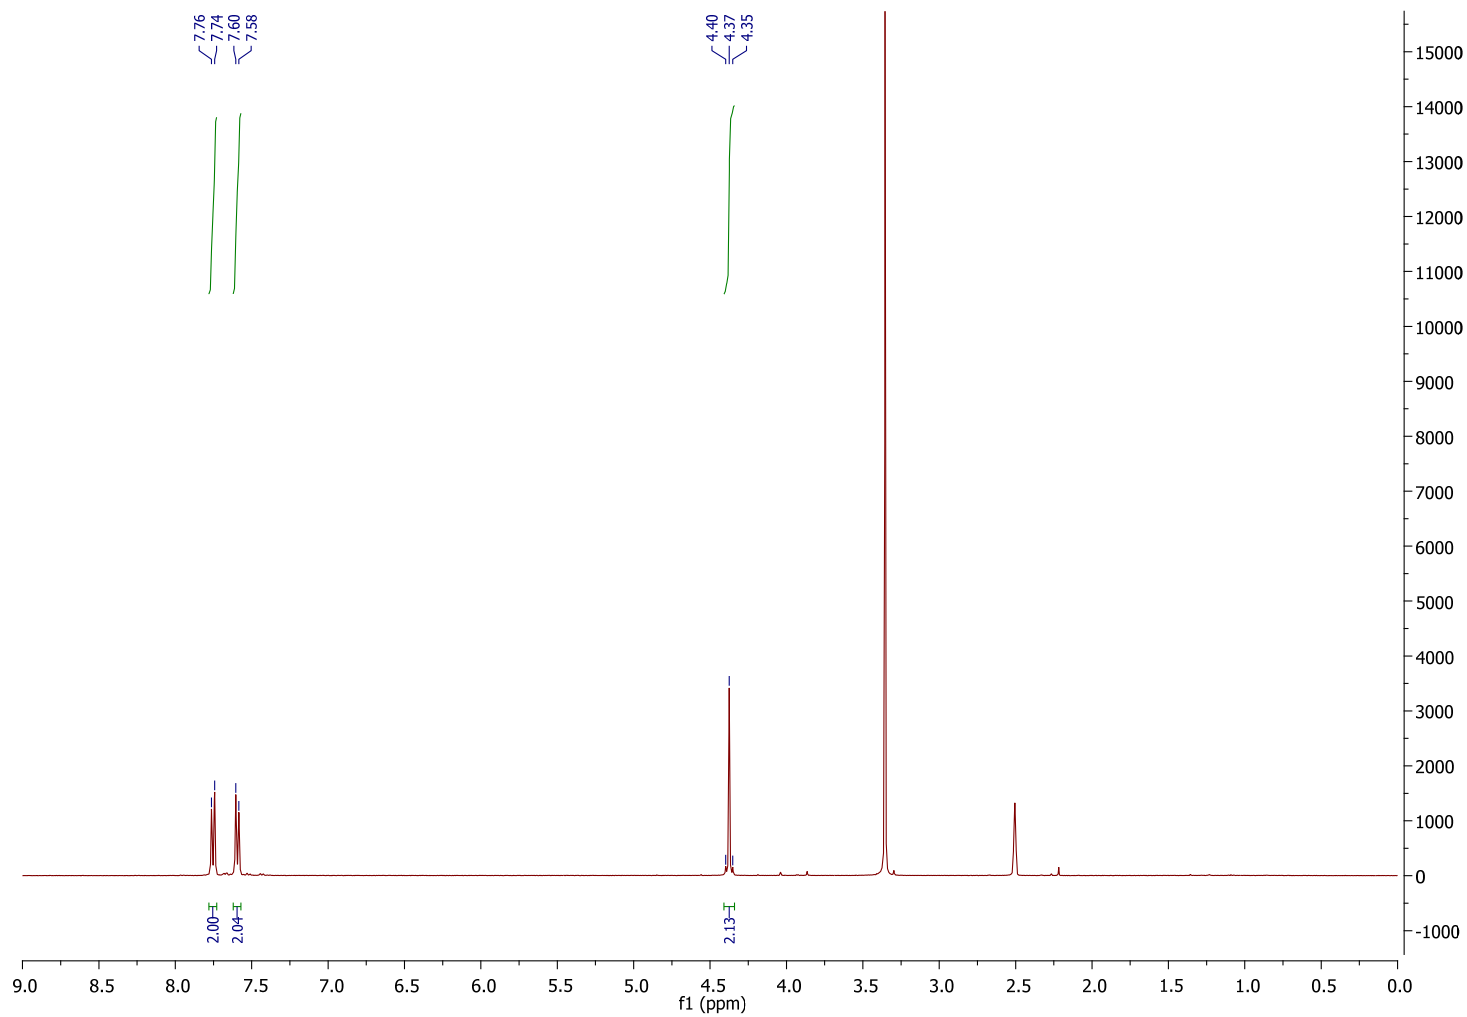

**Figure S13.** <sup>1</sup>H-NMR spectrum for compound 7.

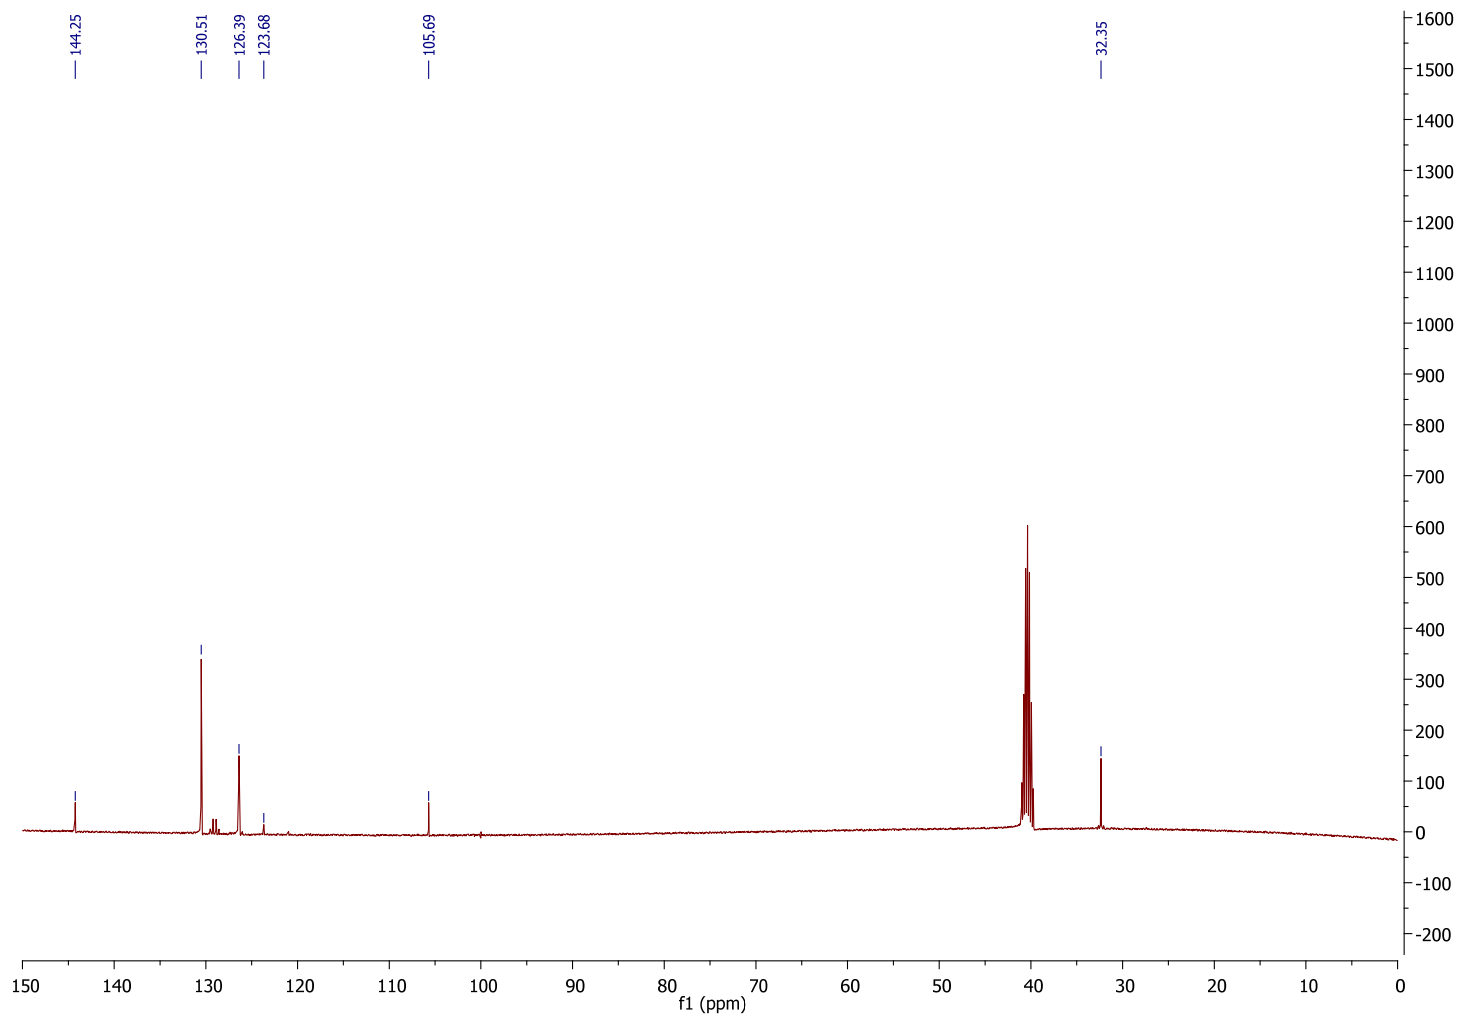

**Figure S14.**  $^{13}\text{C}$ -NMR spectrum for compound 7.

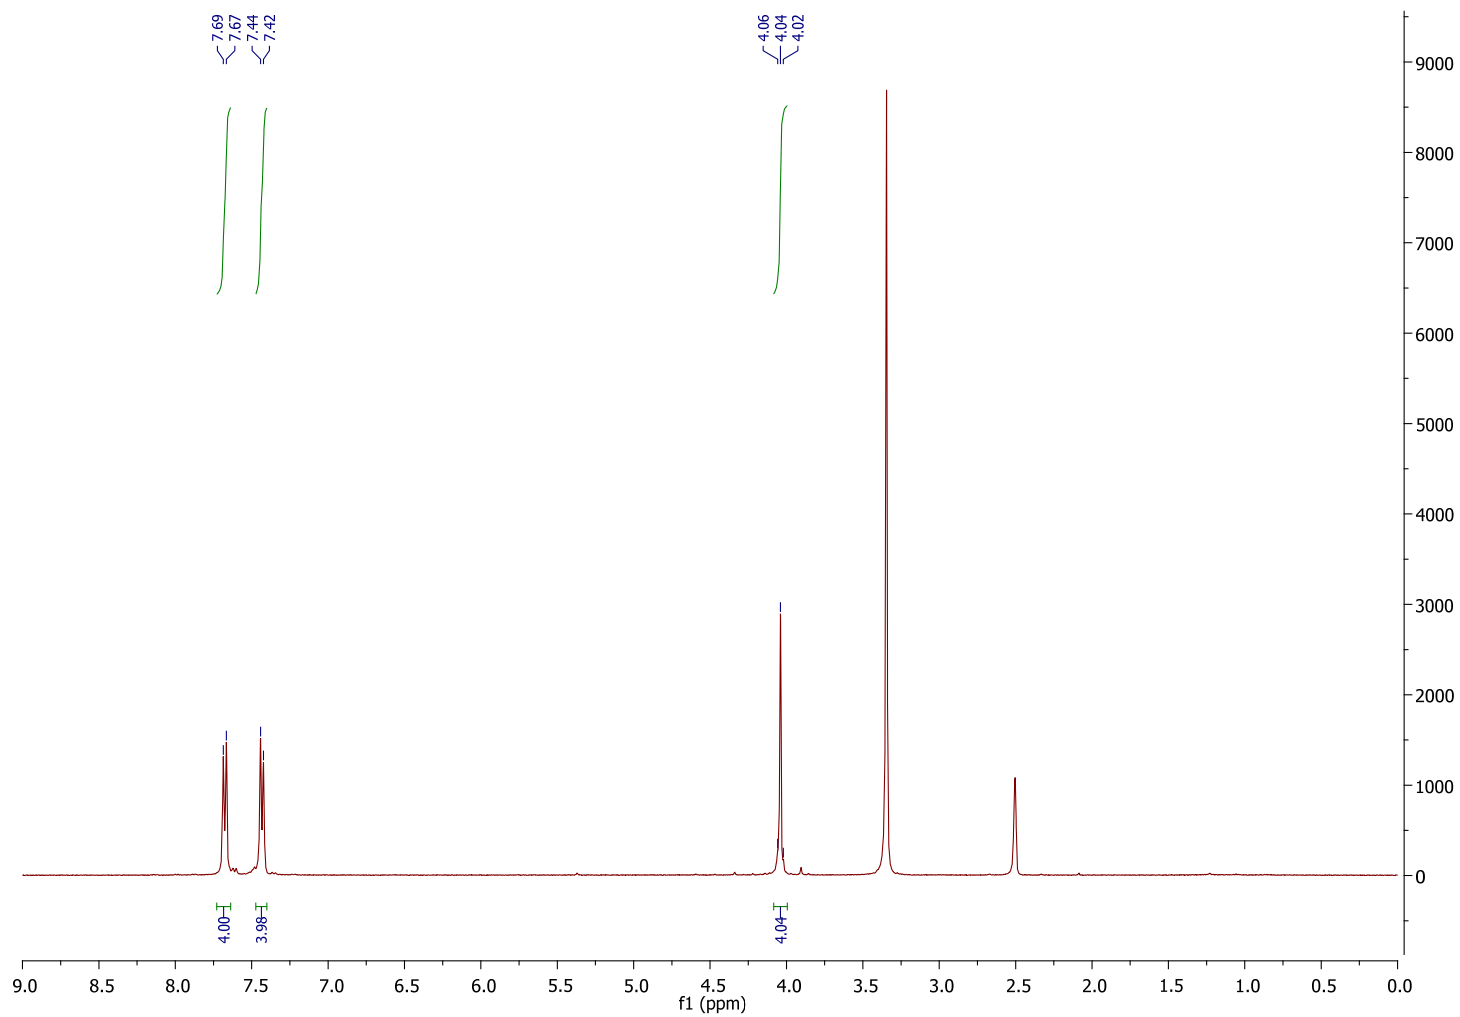

**Figure S15.** <sup>1</sup>H-NMR spectrum for compound **8**.

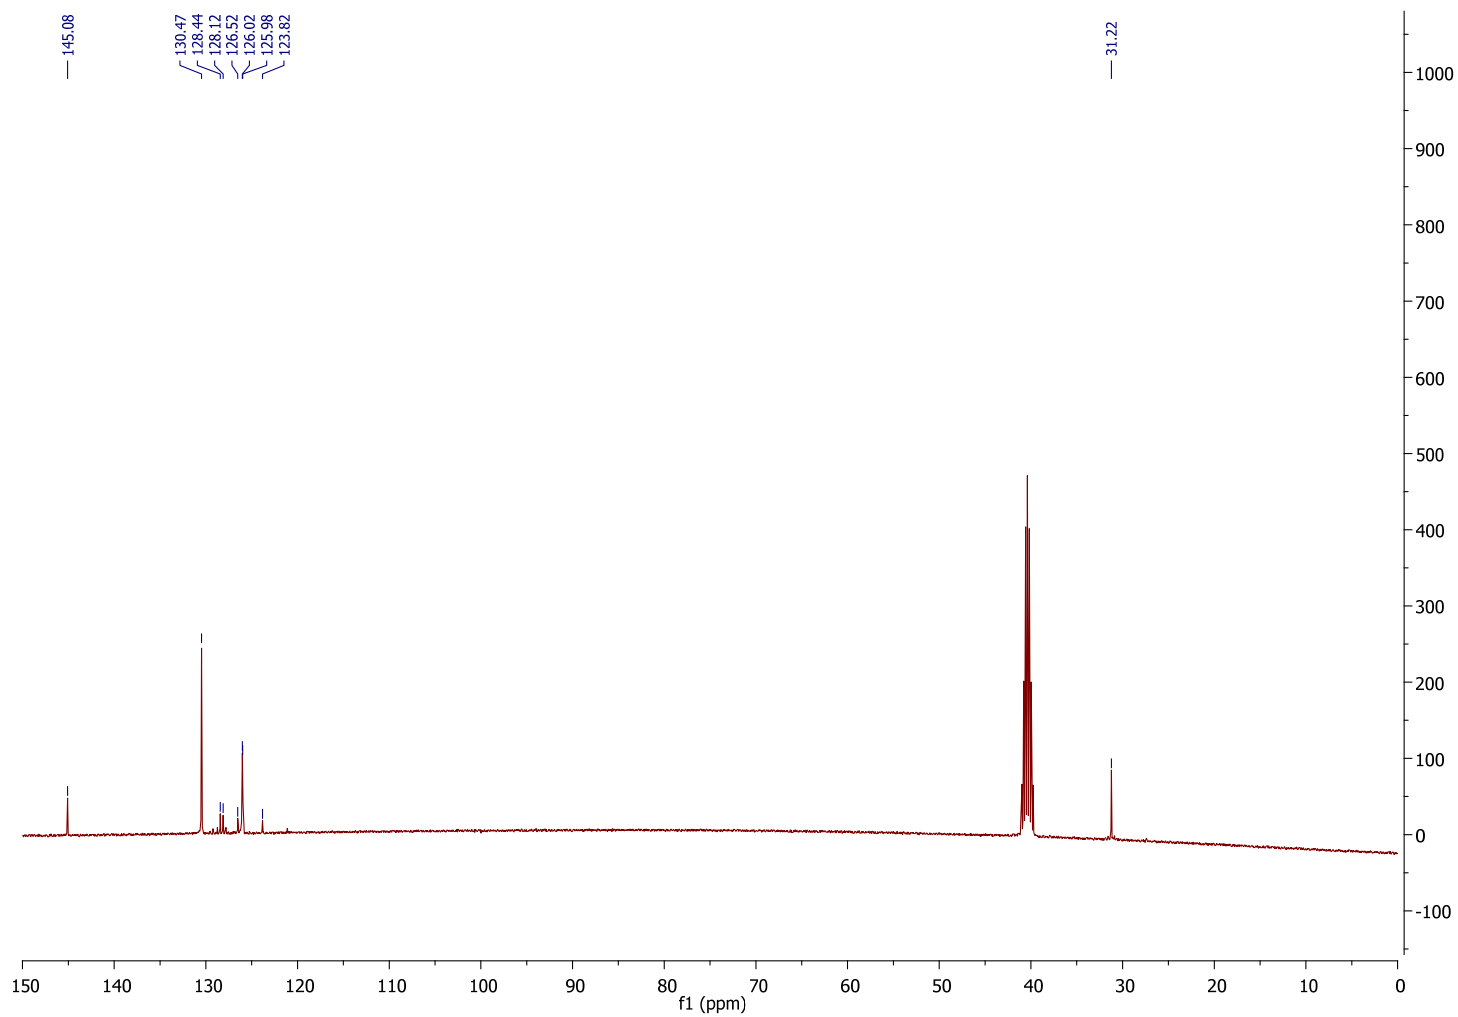

**Figure S16.**  $^{13}\text{C}$ -NMR spectrum for compound **8**.

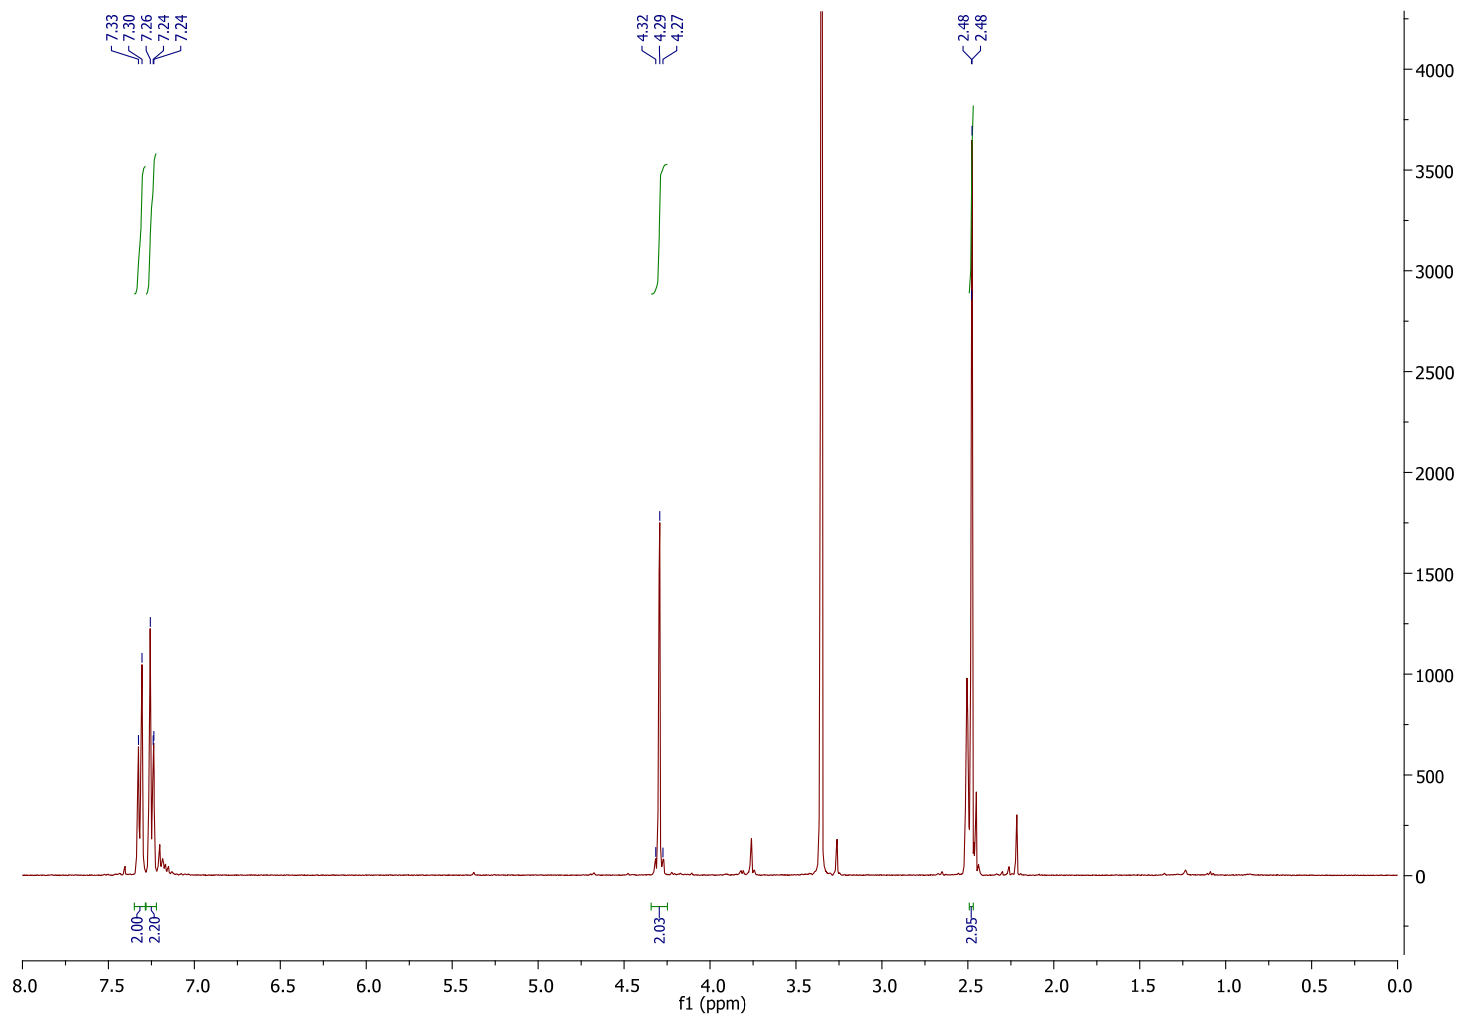

**Figure S17.** <sup>1</sup>H-NMR spectrum for compound **9**.



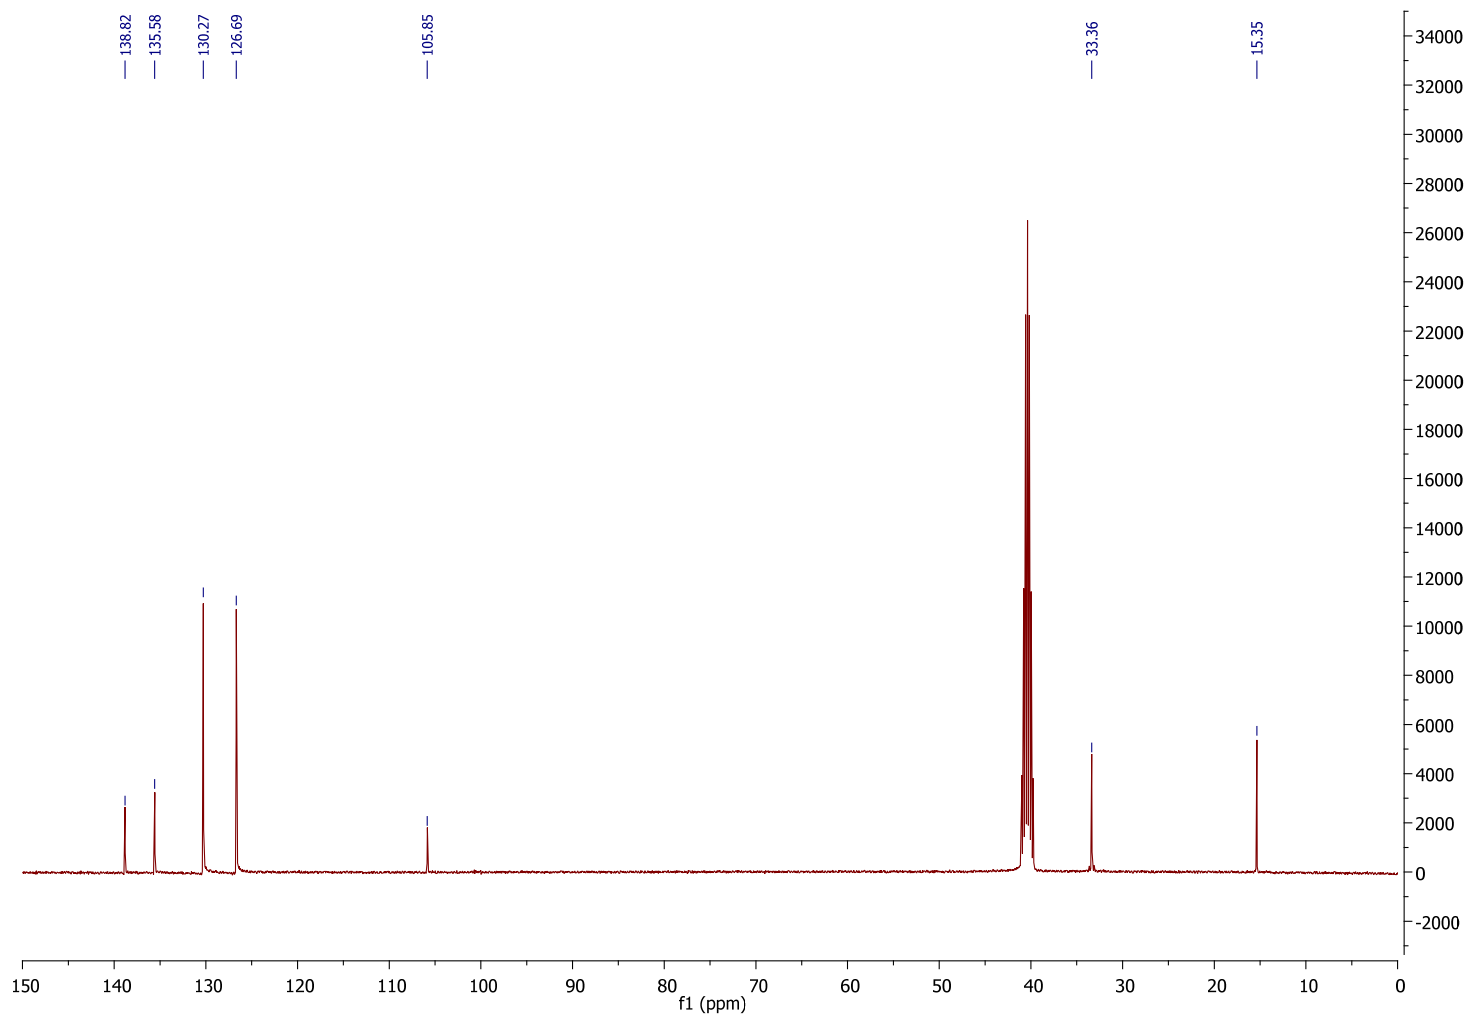

**Figure S18.**  $^{13}\text{C}$ -NMR spectrum for compound **9**.

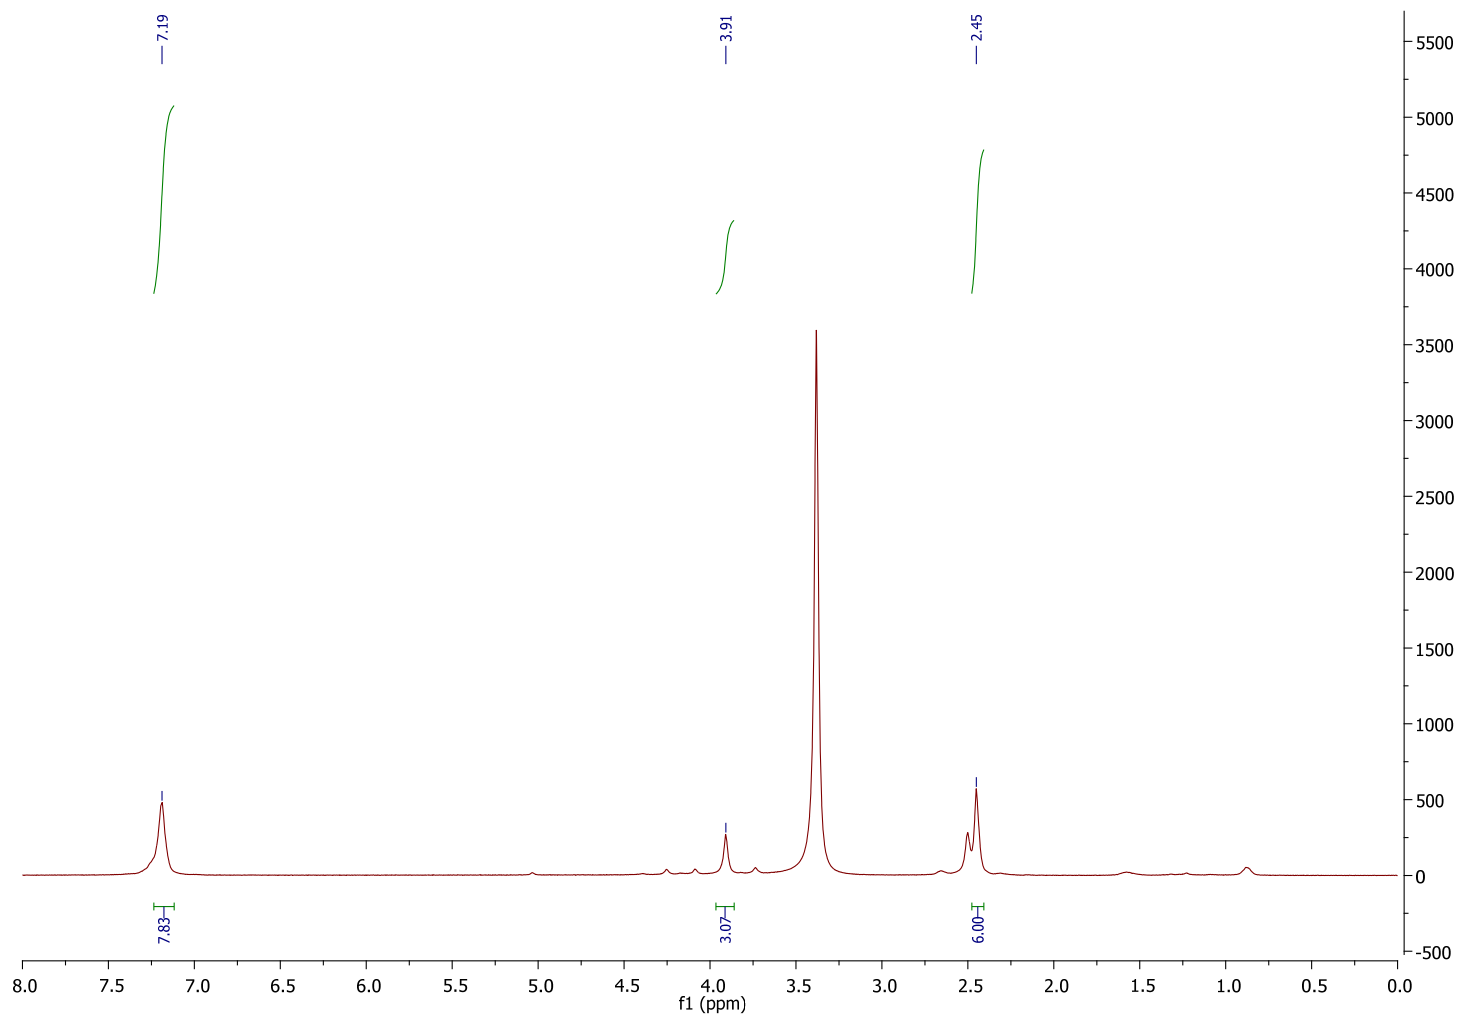

**Figure S19.** <sup>1</sup>H-NMR spectrum for compound **10**.

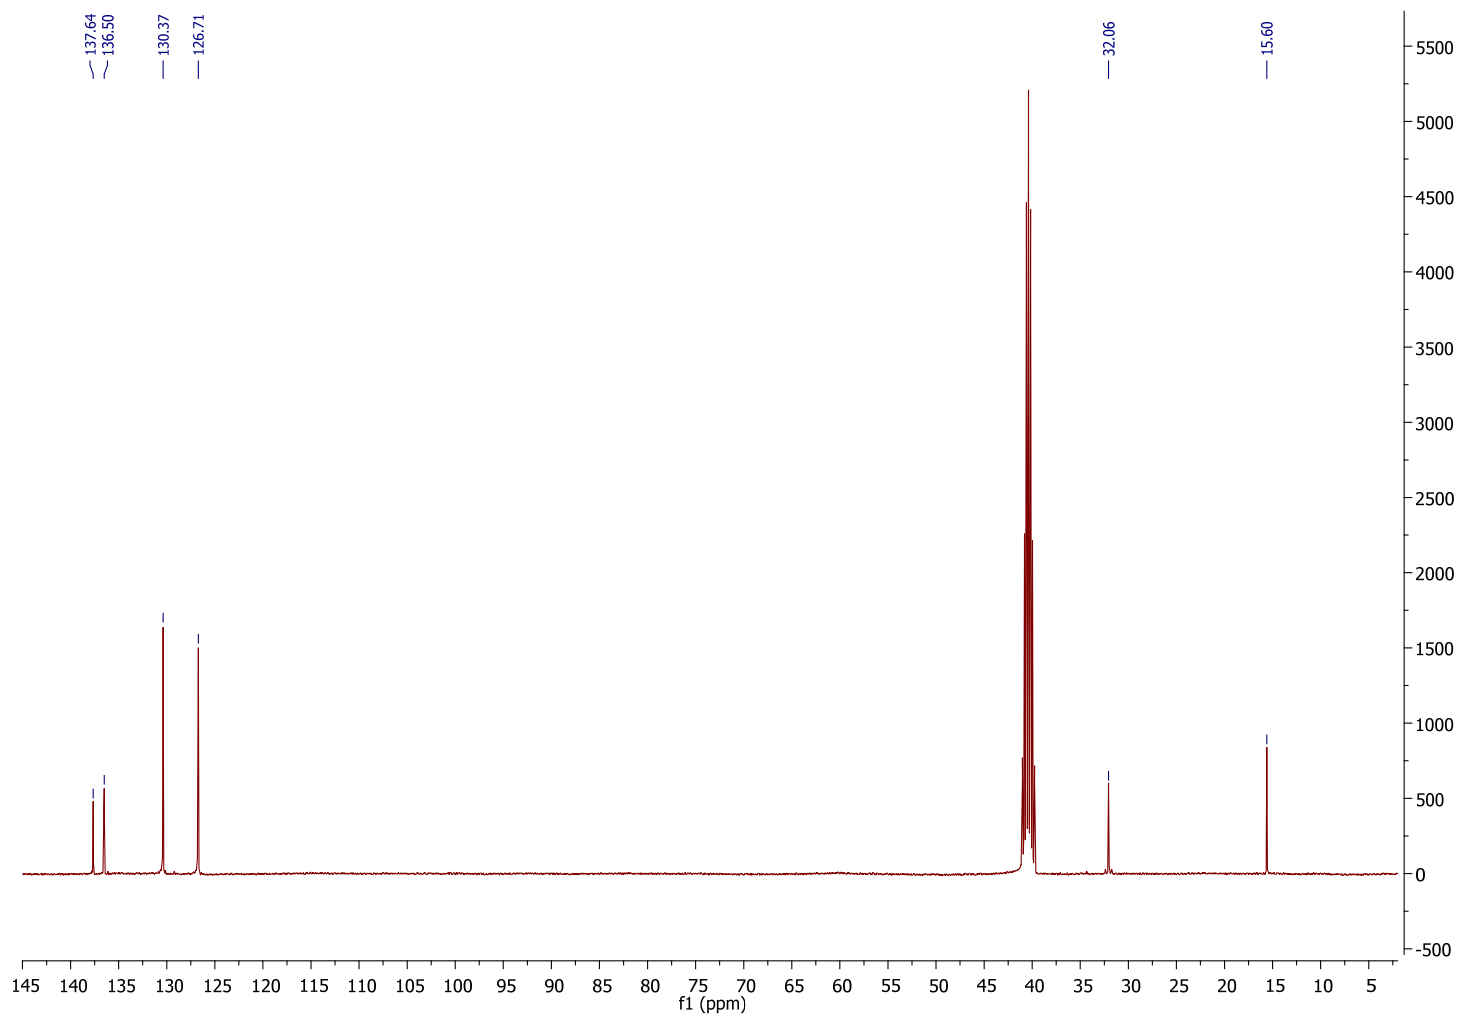

**Figure S20.**  $^{13}\text{C}$ -NMR spectrum for compound **10**.

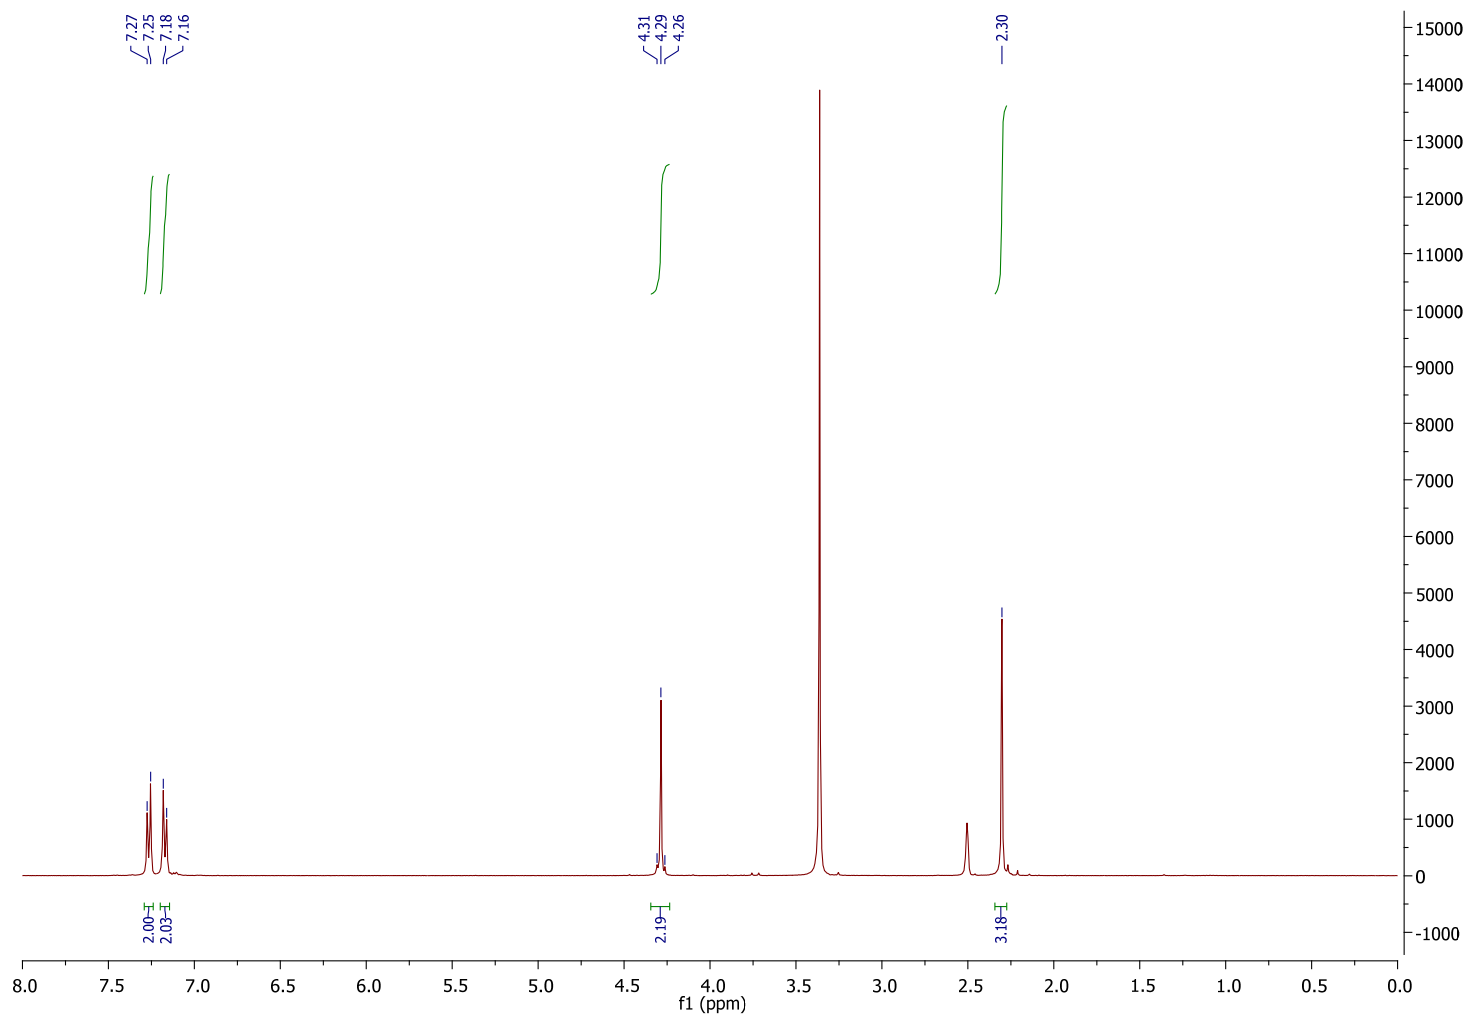

**Figure S21.** <sup>1</sup>H-NMR spectrum for compound **11**.

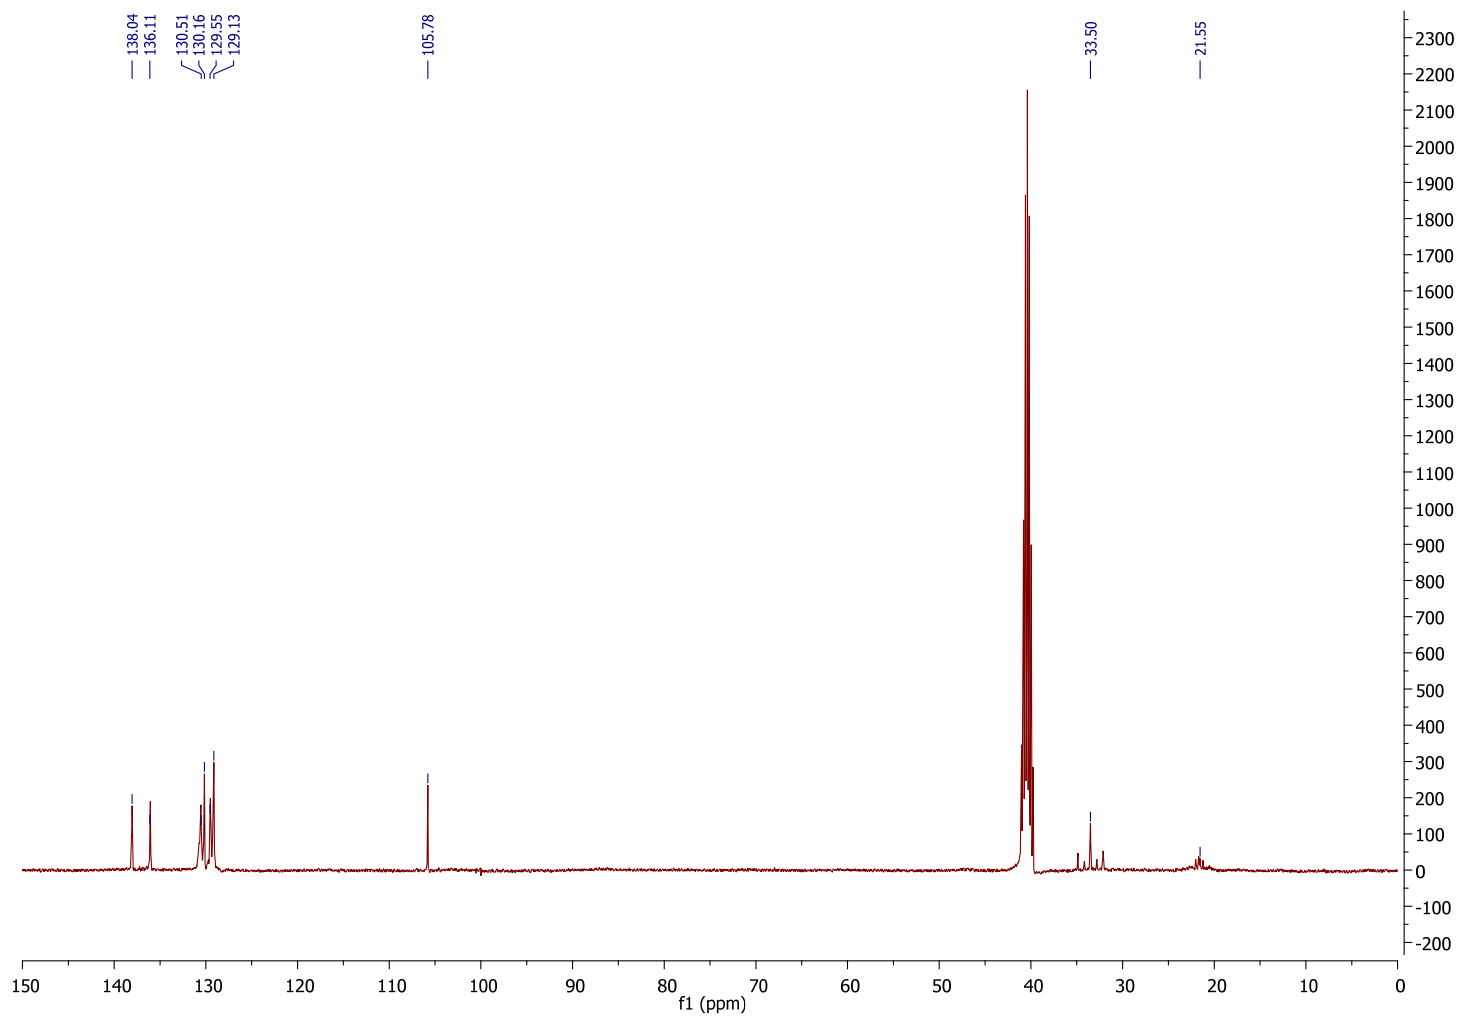

**Figure S22.**  $^{13}\text{C}$ -NMR spectrum for compound **11**.

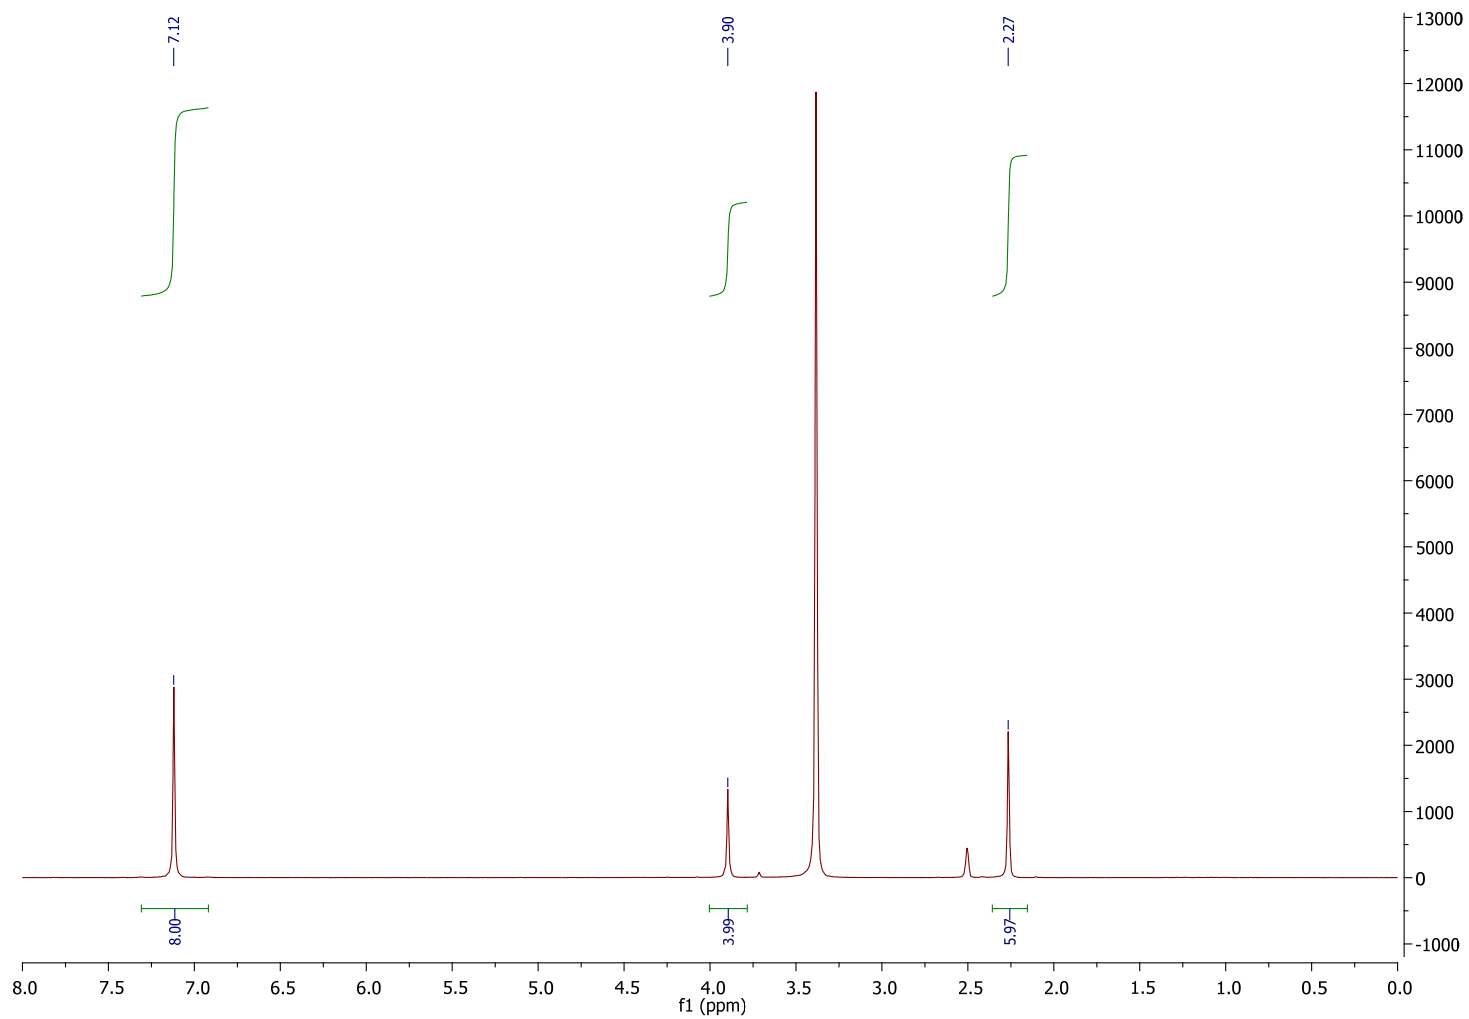

**Figure S23.** <sup>1</sup>H-NMR spectrum for compound **12**.

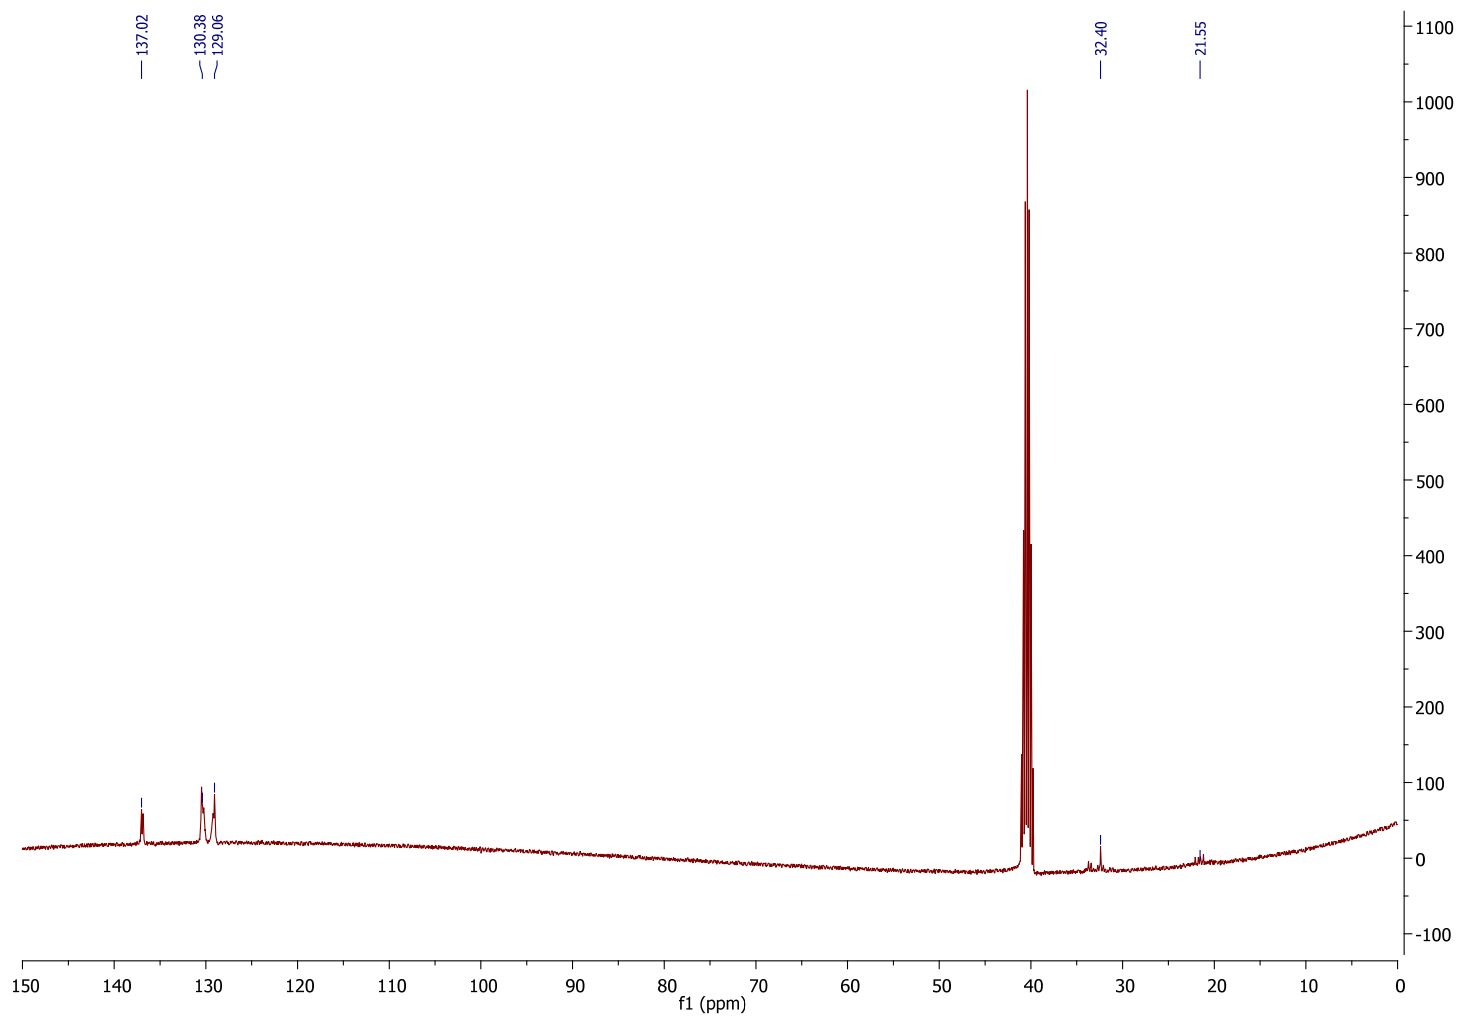

**Figure S24.**  $^{13}\text{C}$ -NMR spectrum for compound **12**.

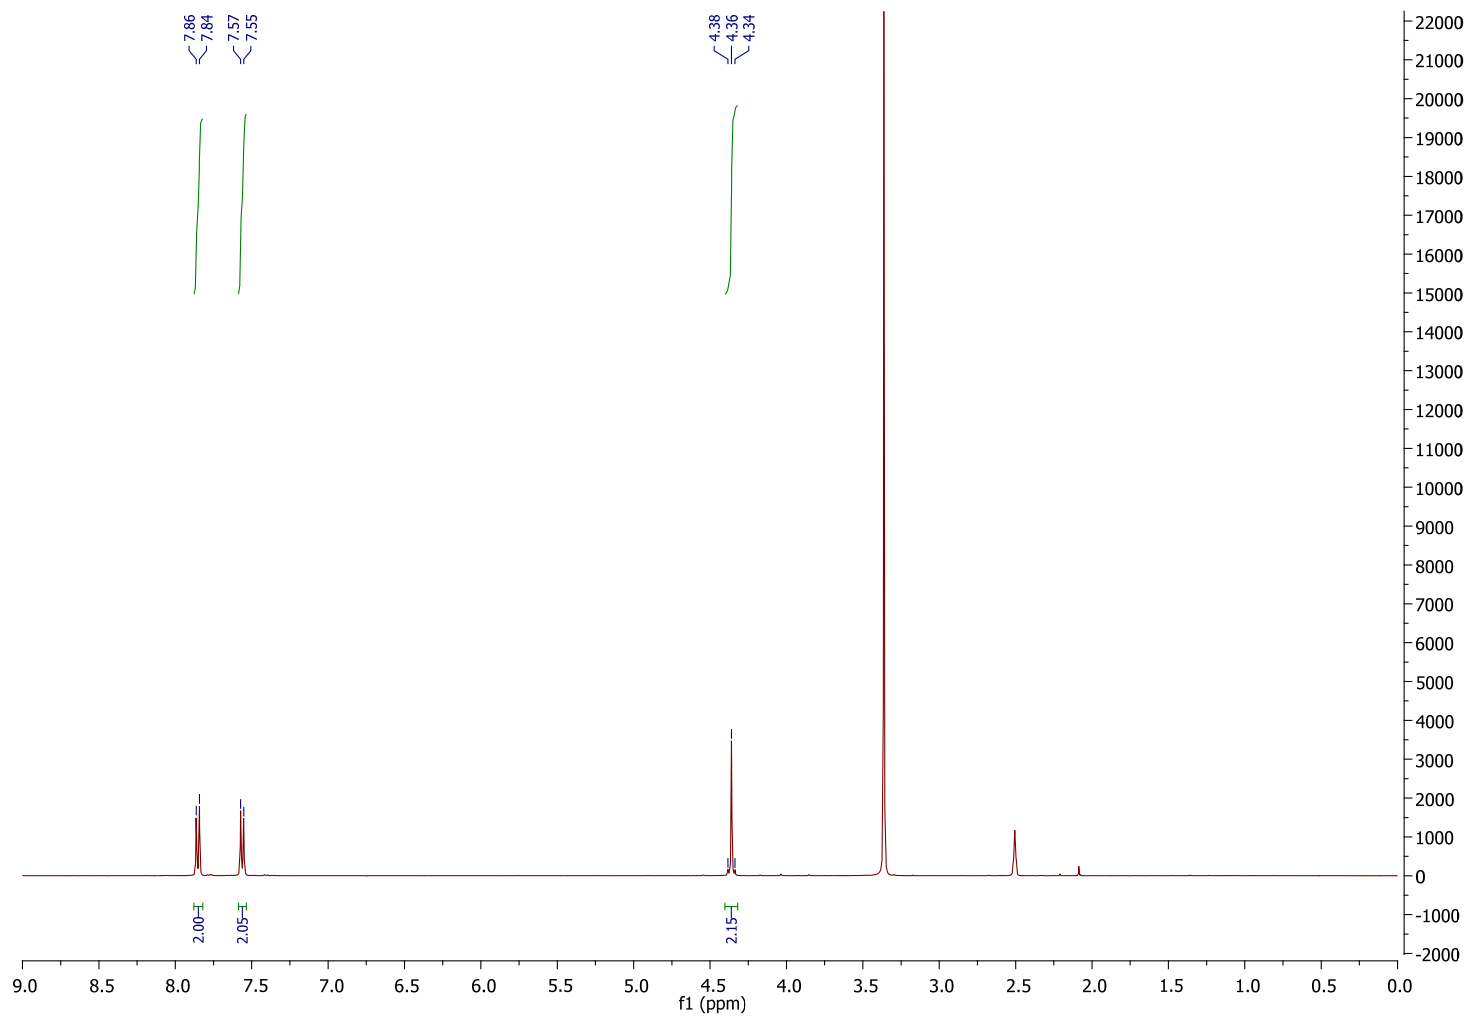

**Figure S25.**  $^1\text{H-NMR}$  spectrum for compound **13**.



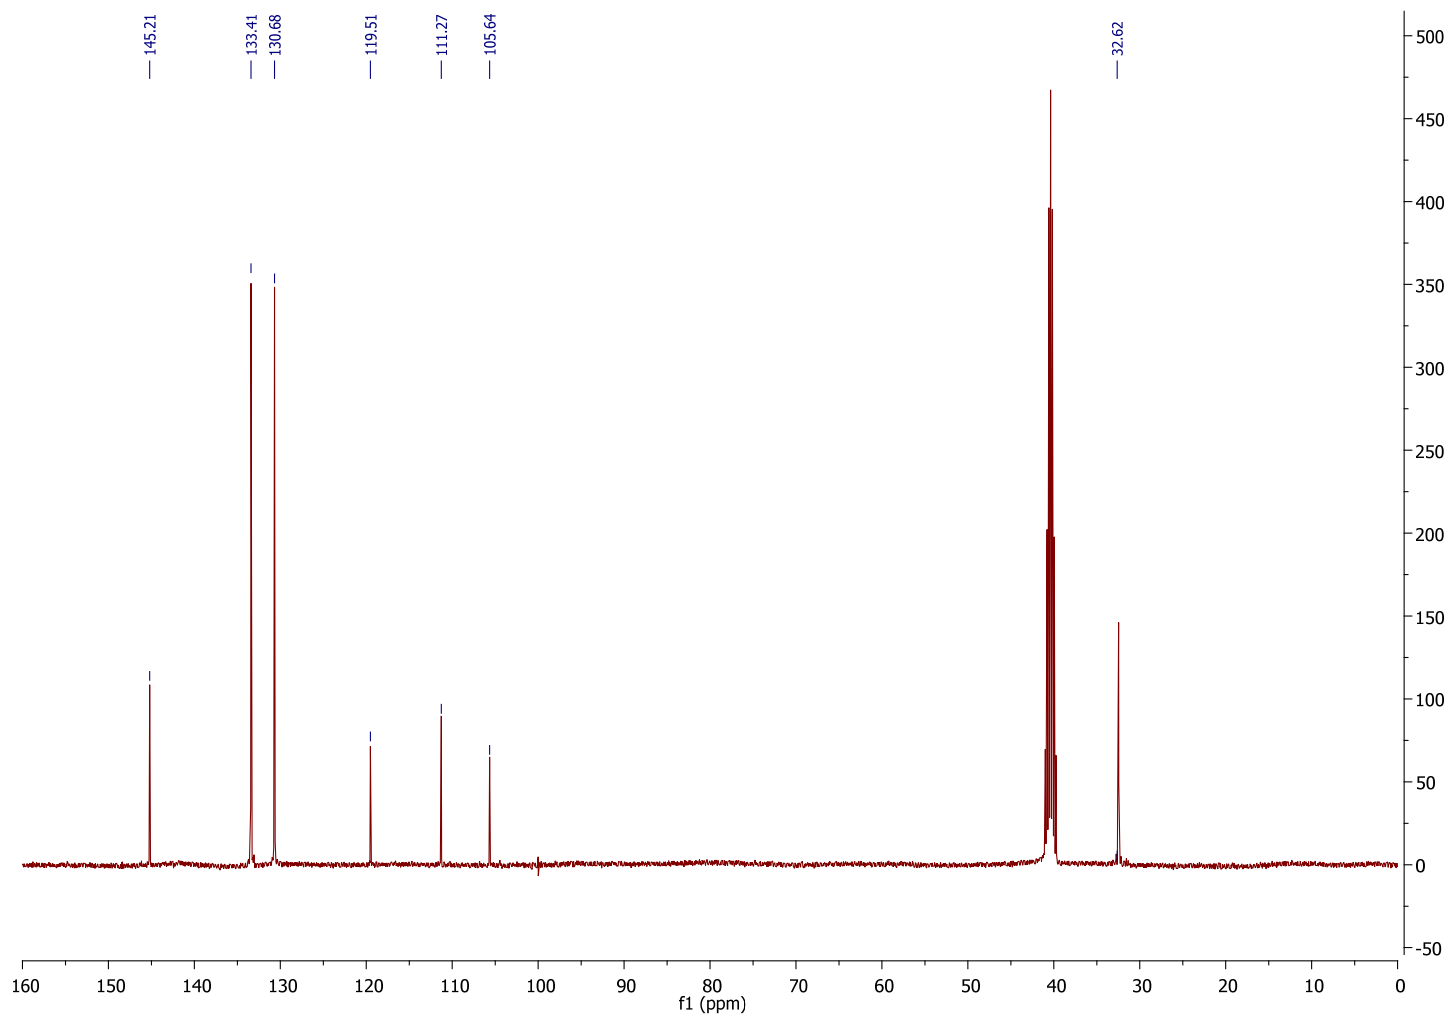

**Figure S26.**  $^{13}\text{C}$ -NMR spectrum for compound **13**.

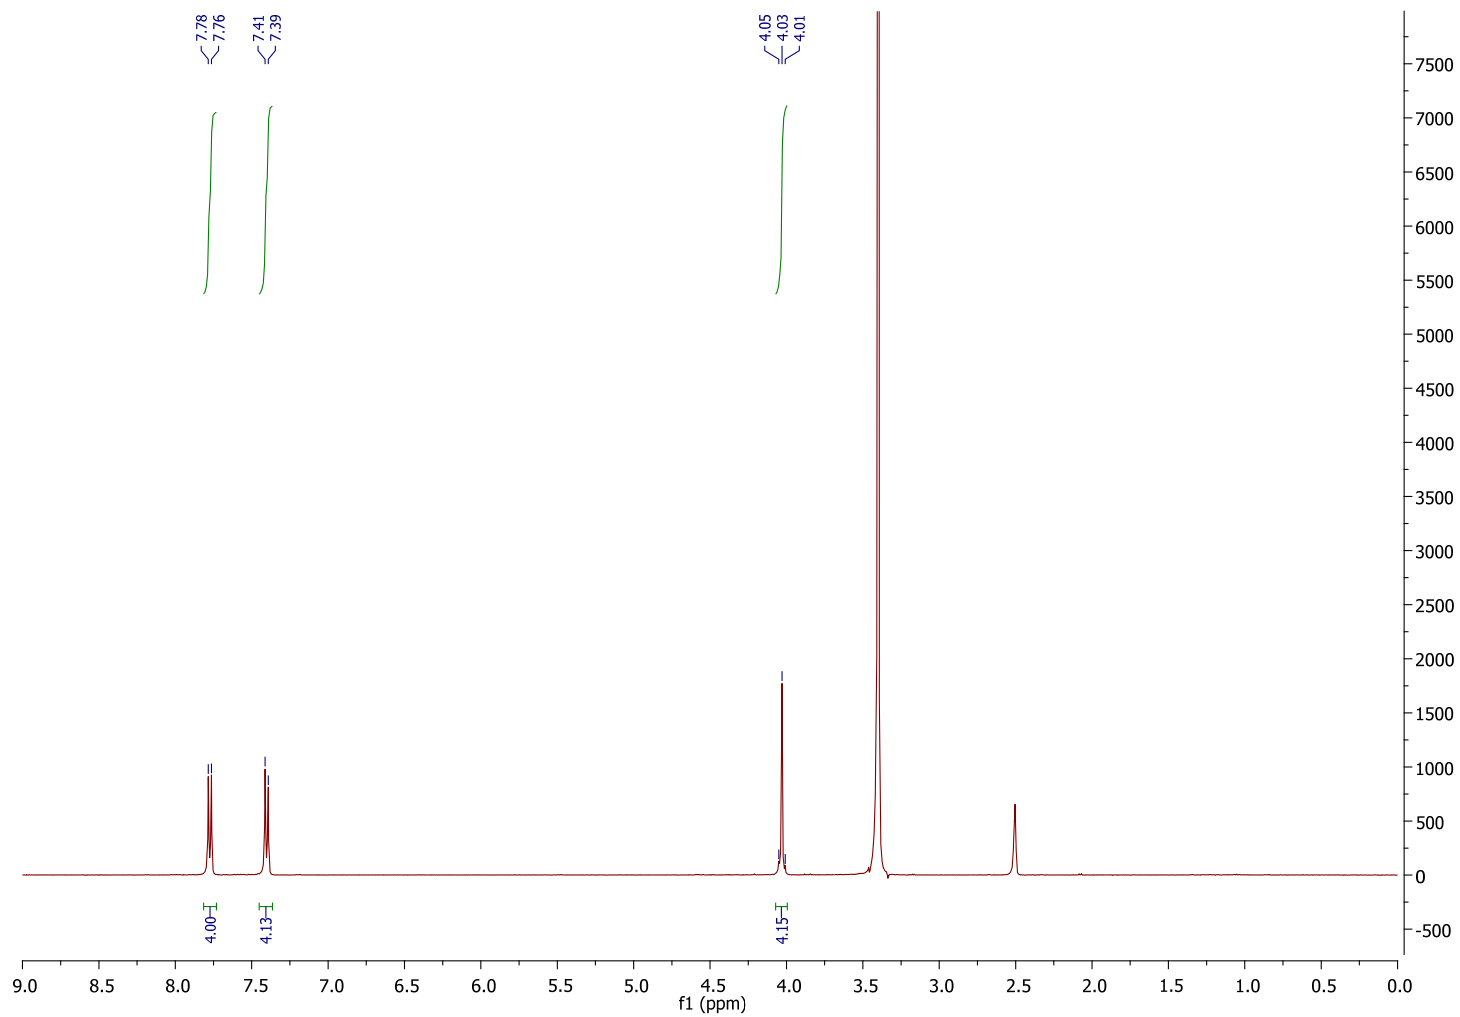

**Figure S27.** <sup>1</sup>H-NMR spectrum for compound **14**.

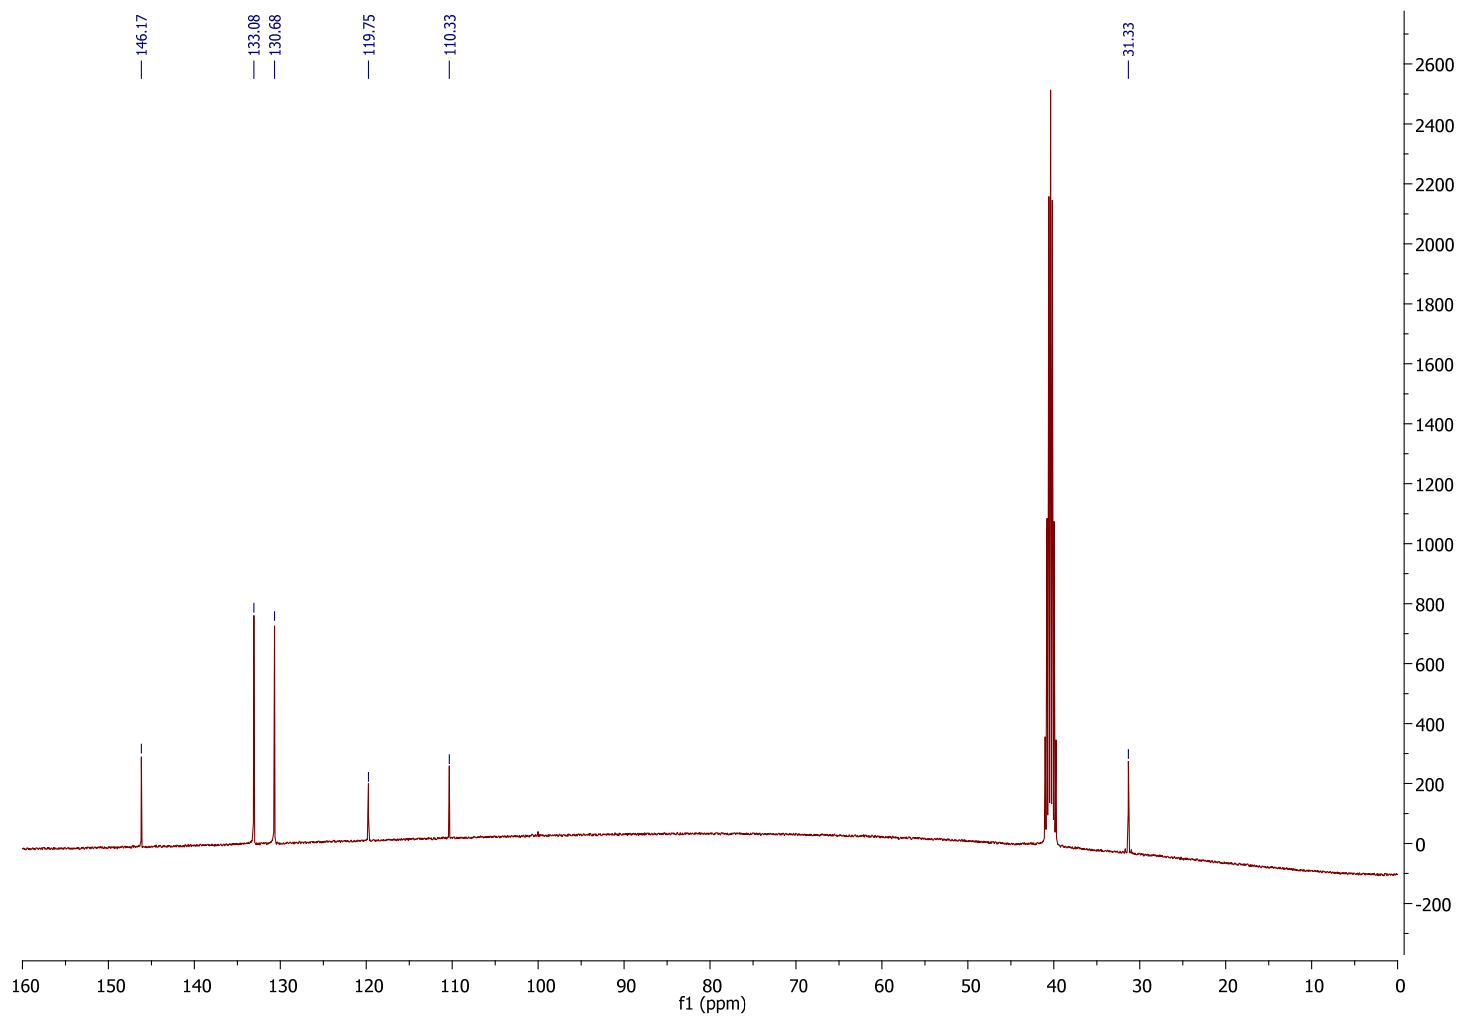

**Figure S28.**  $^{13}\text{C}$ -NMR spectrum for compound **14**.

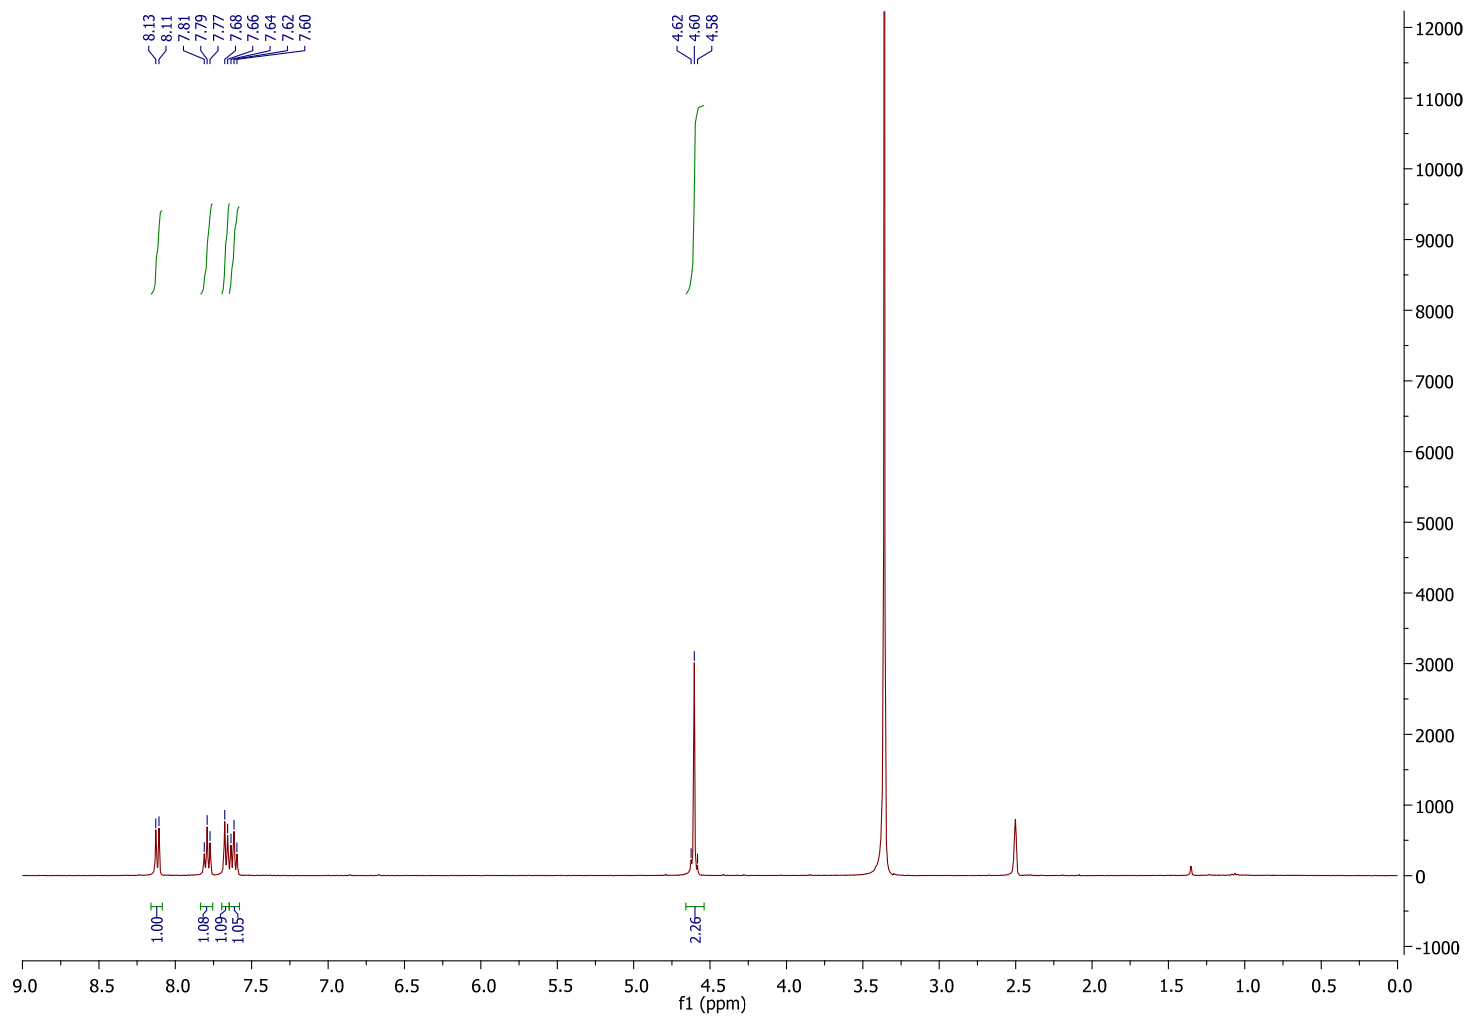

**Figure S29.**  $^1\text{H-NMR}$  spectrum for compound **15**.

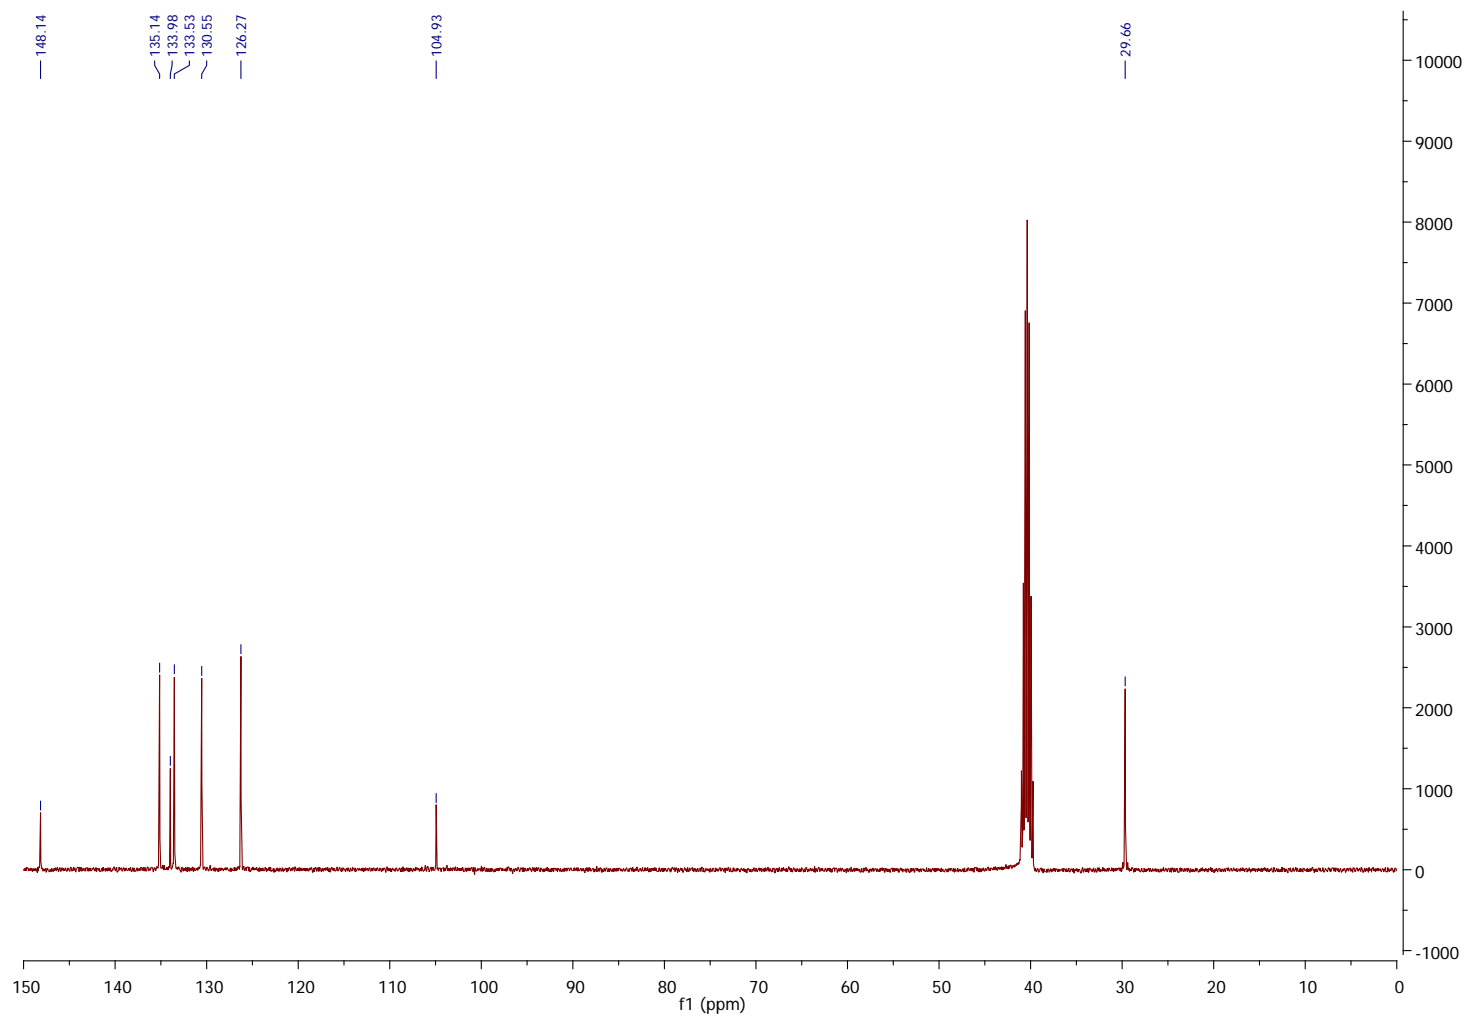

**Figure S30.**  $^{13}\text{C}$ -NMR spectrum for compound **15**.

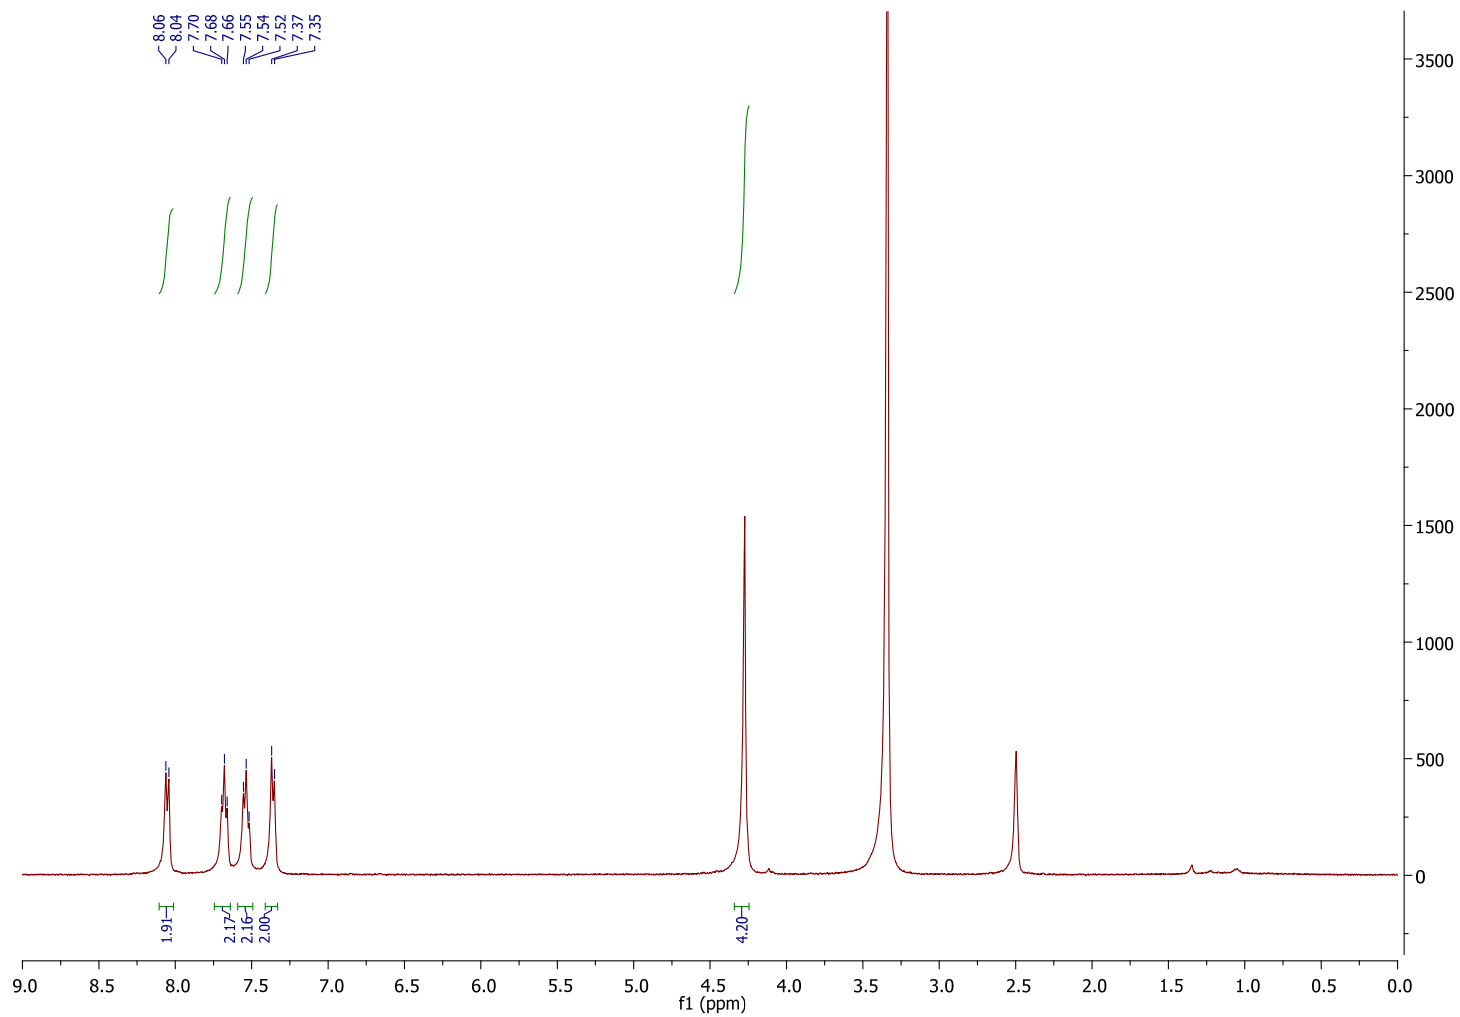

**Figure S31.** <sup>1</sup>H-NMR spectrum for compound **16**.

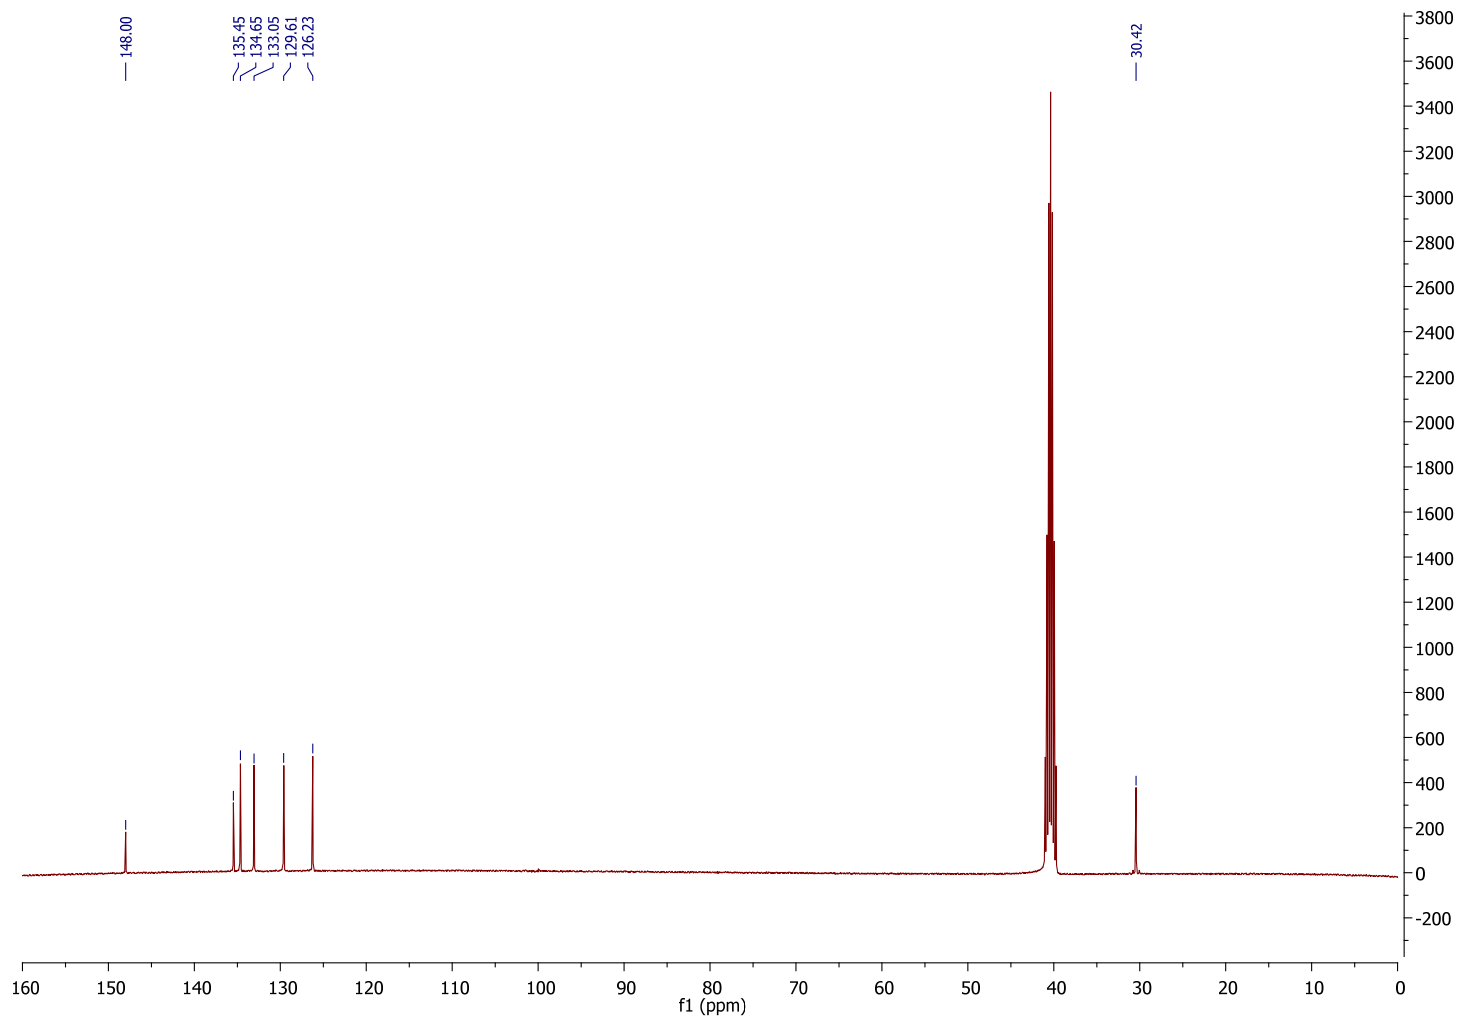

**Figure S32.**  $^{13}\text{C}$ -NMR spectrum for compound **16**.

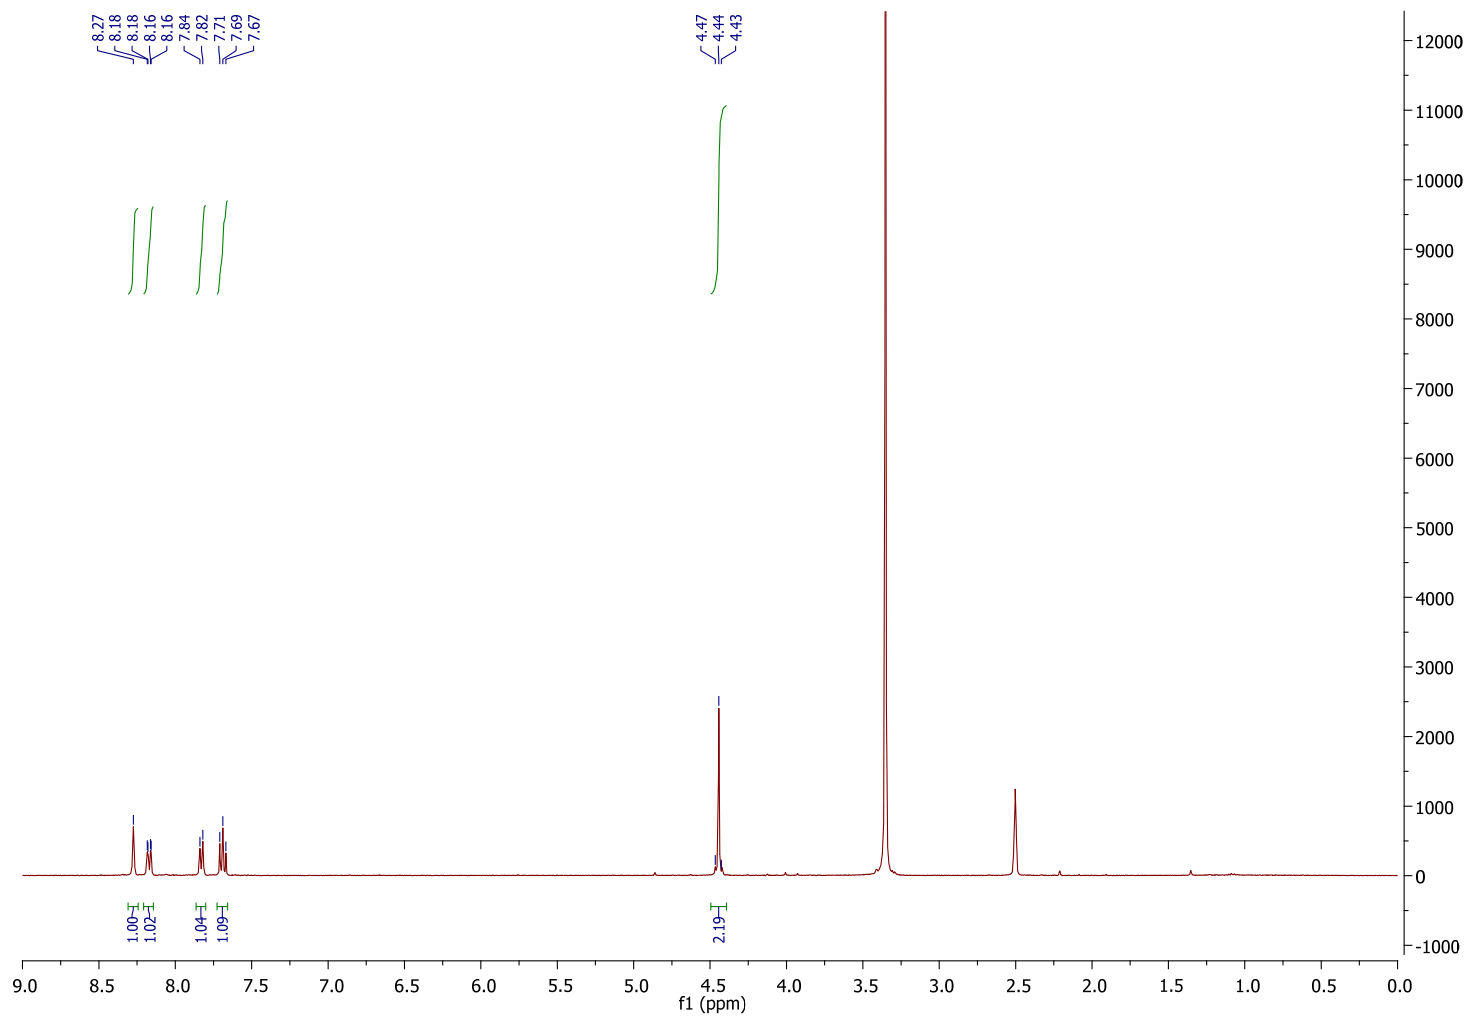

**Figure S33.**  $^1\text{H-NMR}$  spectrum for compound **17**.



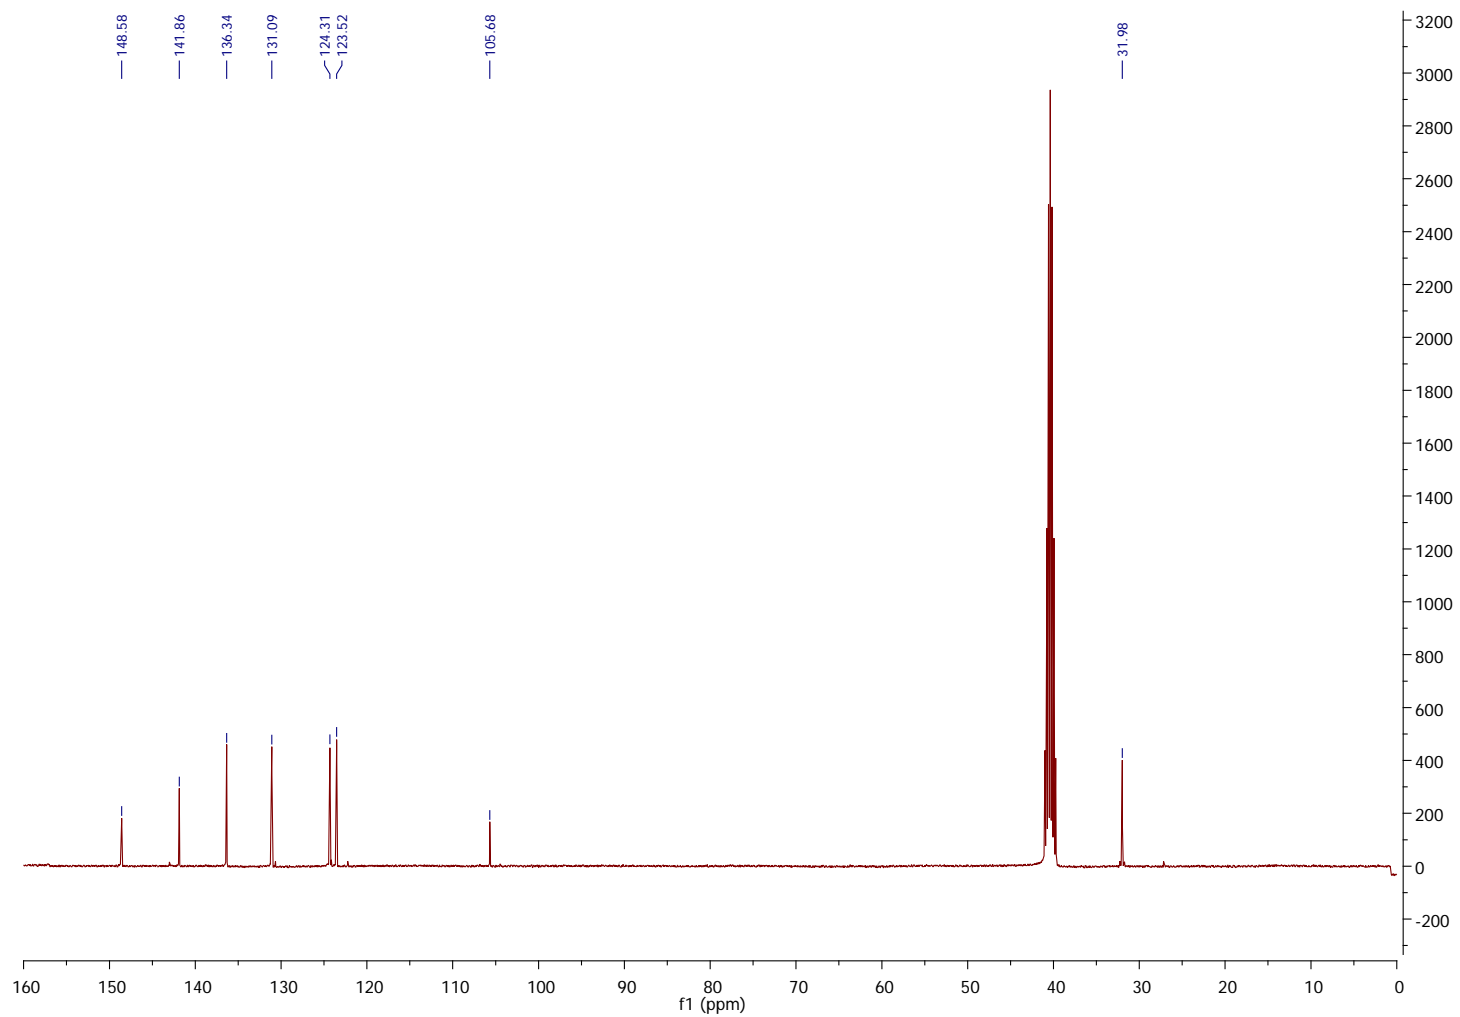

**Figure S34.**  $^{13}\text{C}$ -NMR spectrum for compound **17**.

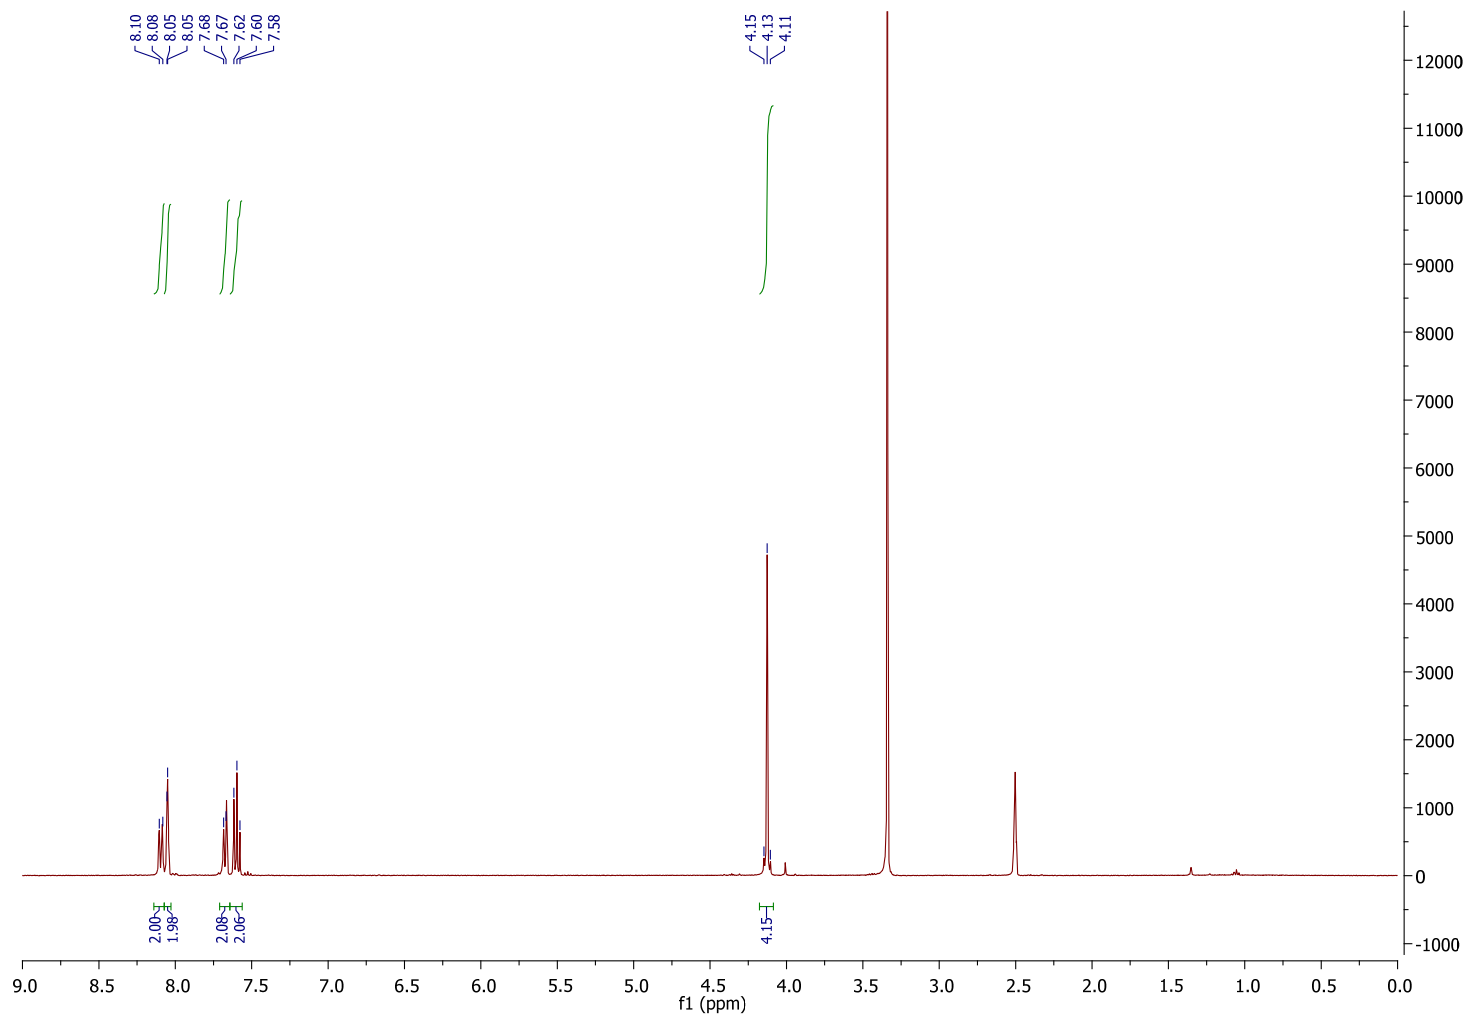

**Figure S35.** <sup>1</sup>H-NMR spectrum for compound **18**.

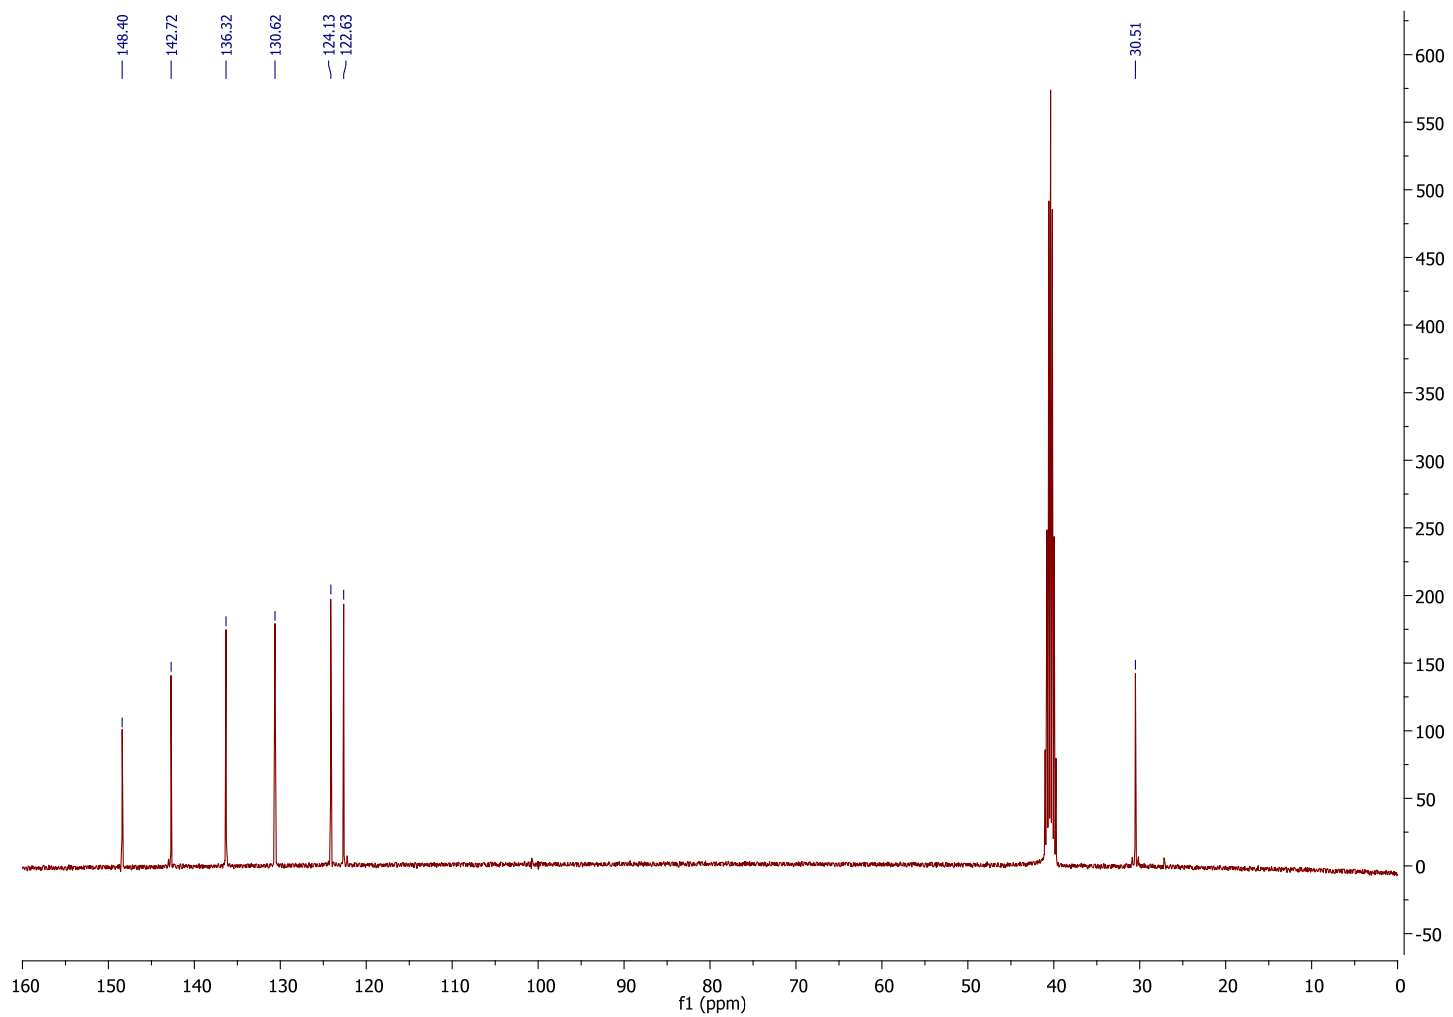

**Figure S36.**  $^{13}\text{C}$ -NMR spectrum for compound **18**.

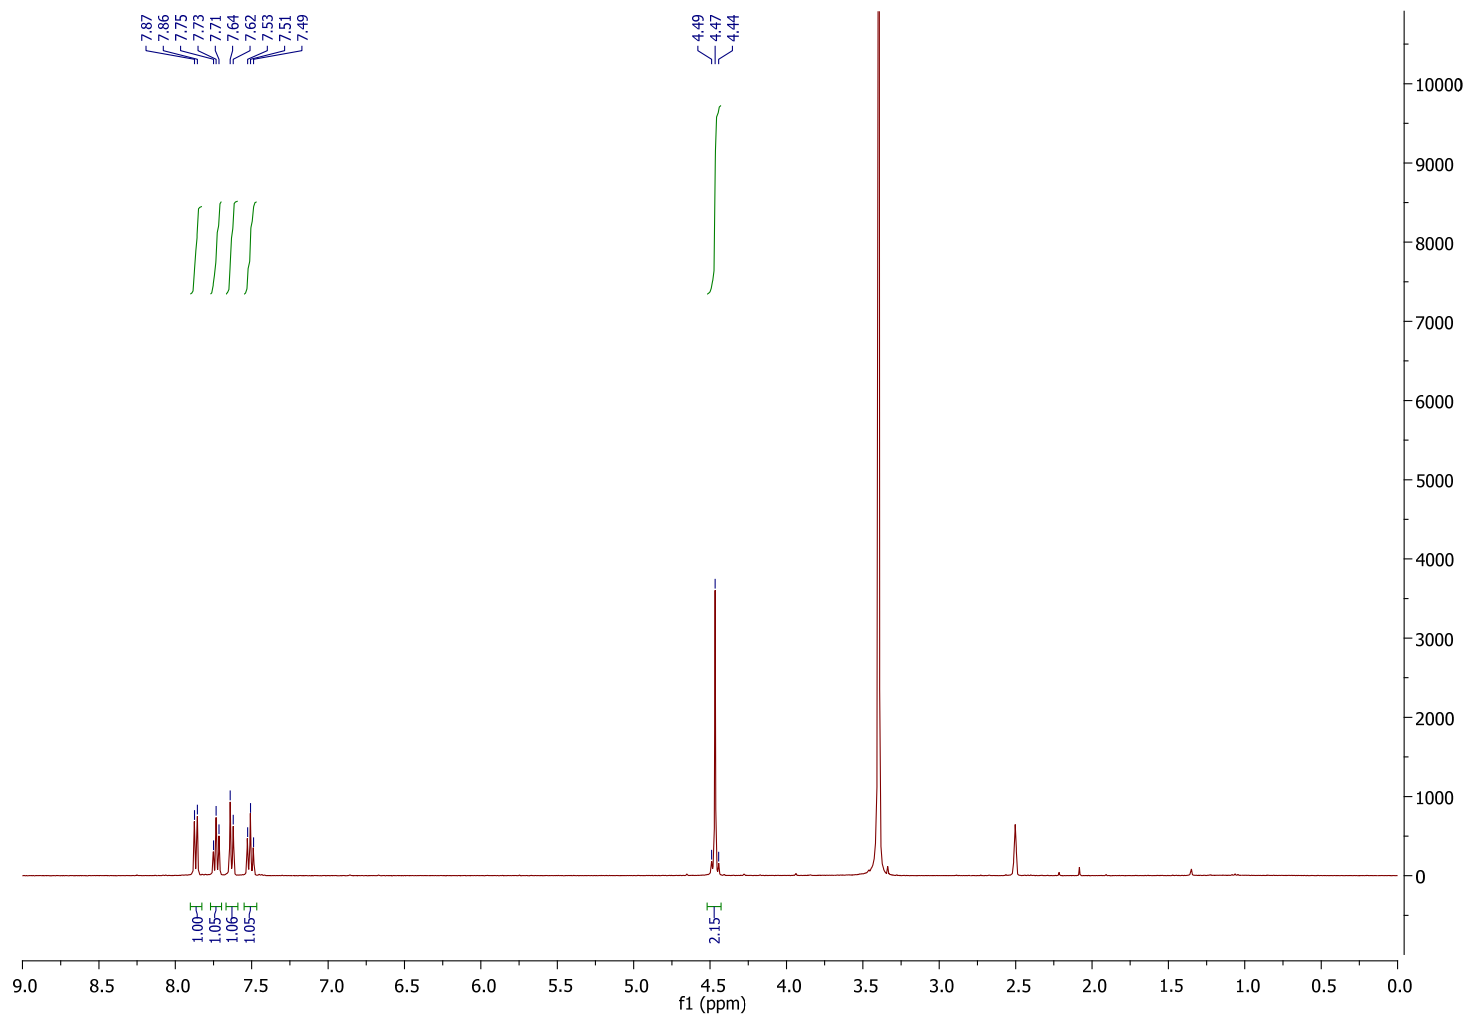

**Figure S37.** <sup>1</sup>H-NMR spectrum for compound **19**.

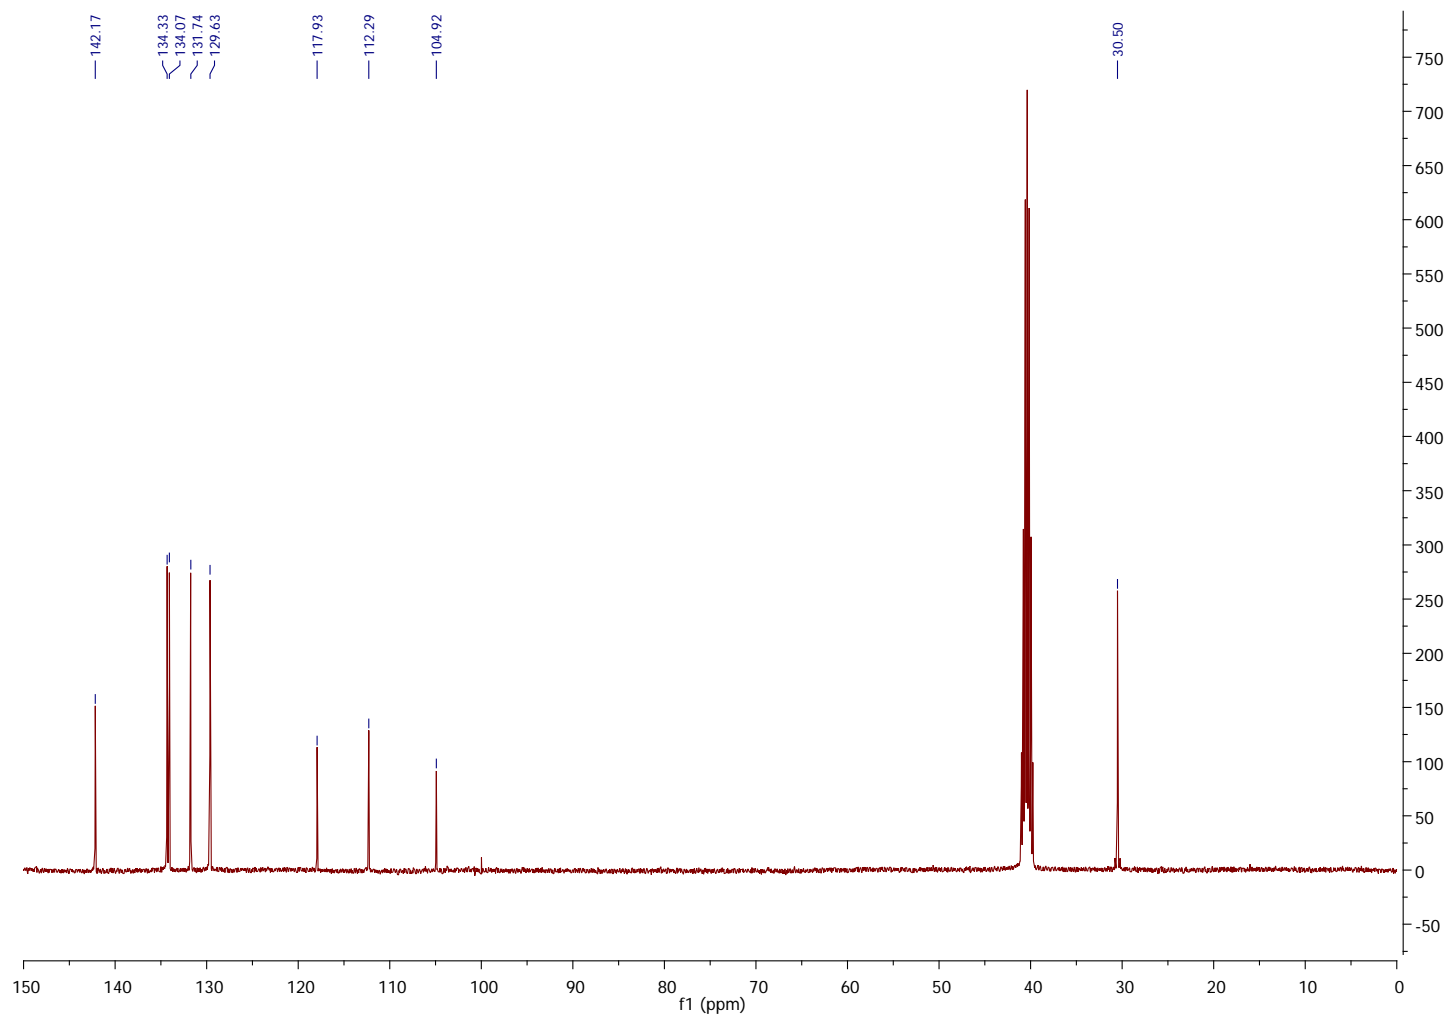

**Figure S38.** <sup>13</sup>C-NMR spectrum for compound **19**.

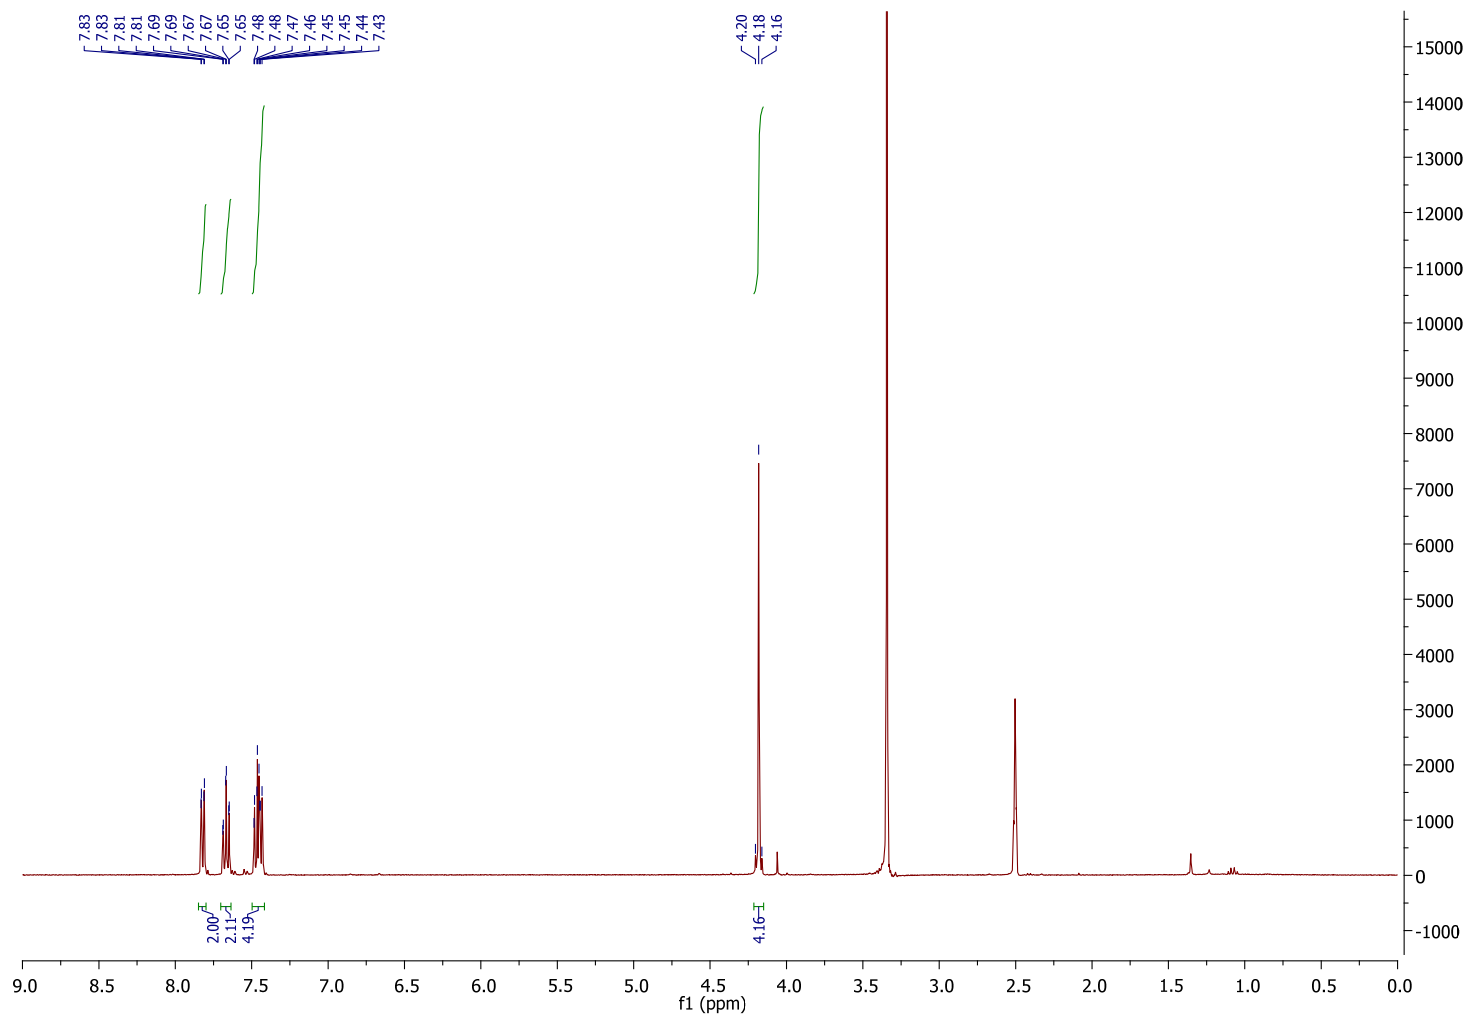

**Figure S39.** <sup>1</sup>H-NMR spectrum for compound **20**.

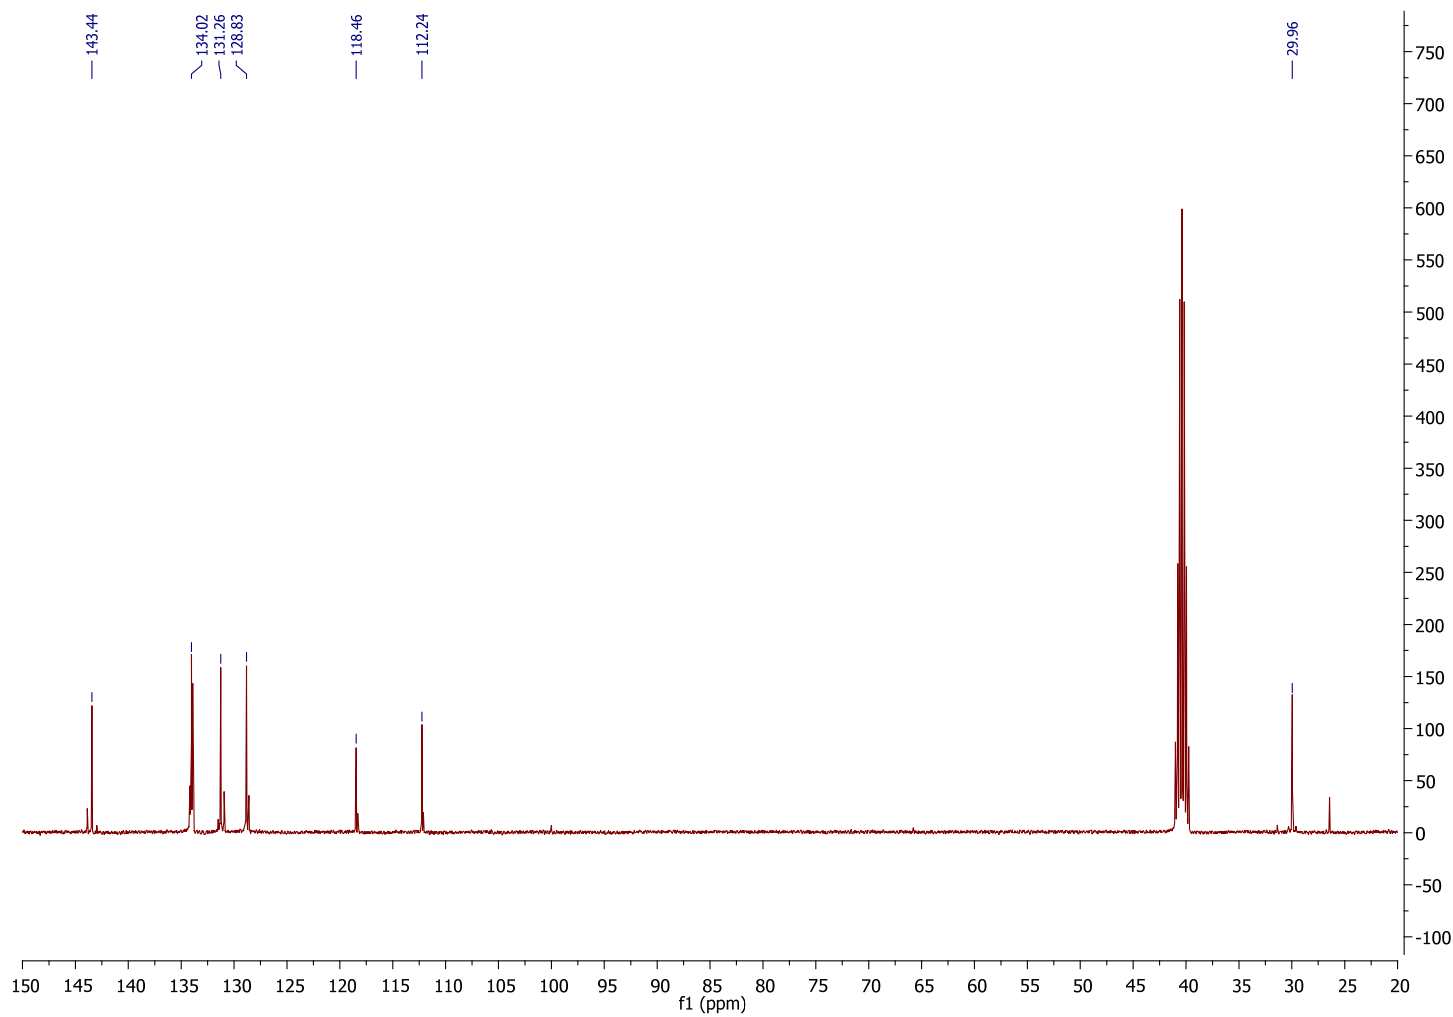

**Figure S40.** <sup>13</sup>C-NMR spectrum for compound **20**.

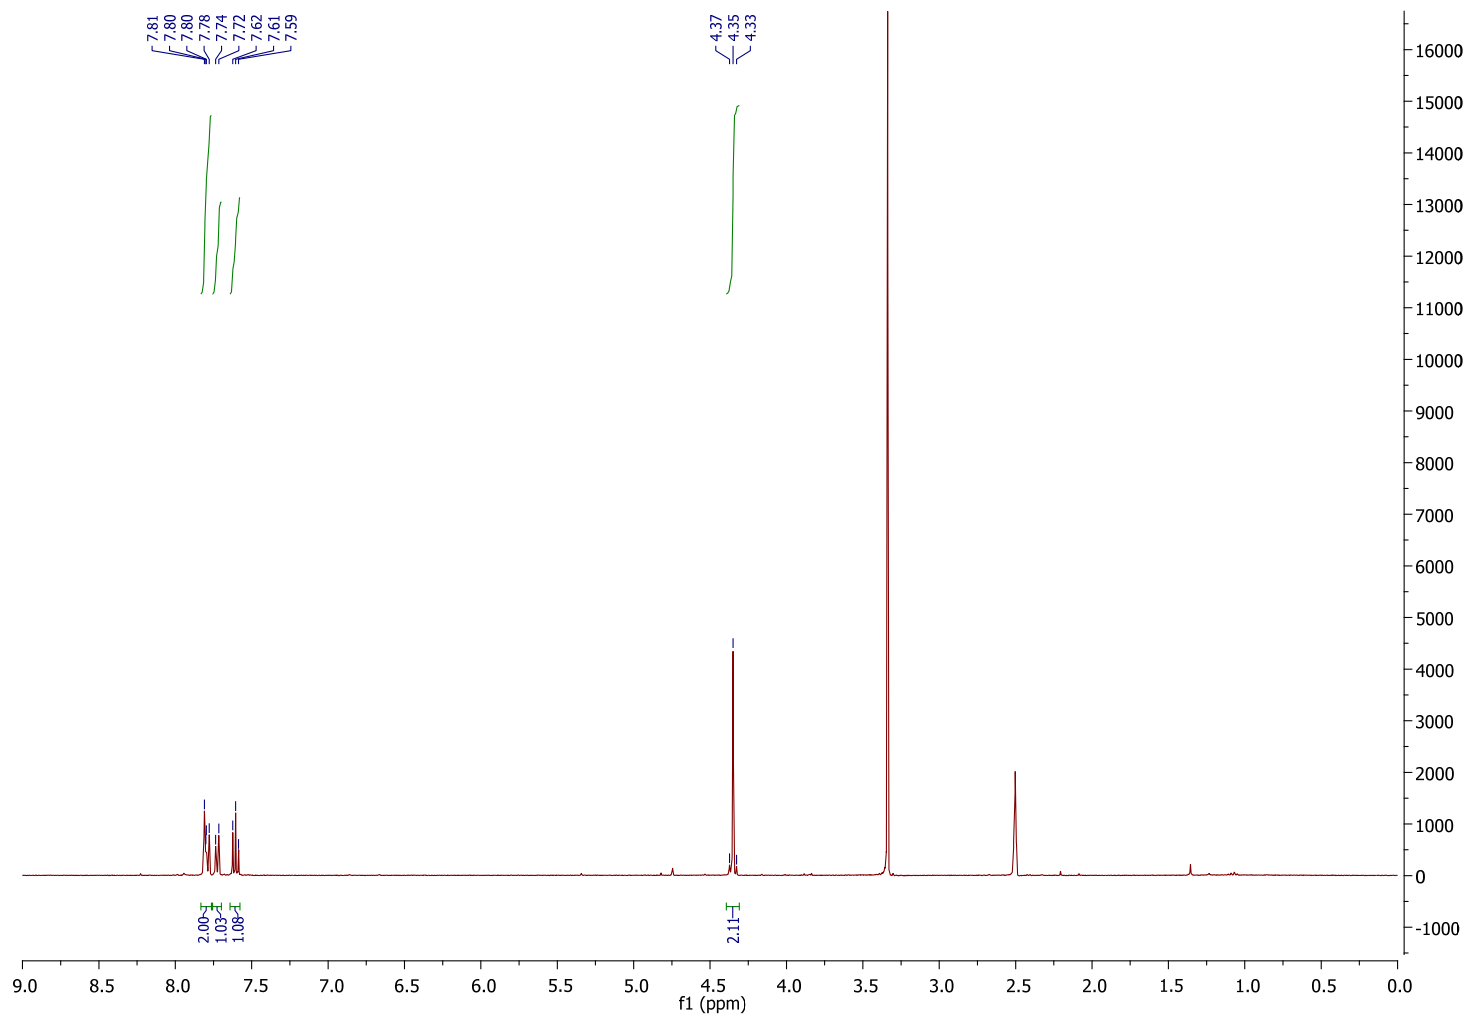

**Figure S41.** <sup>1</sup>H-NMR spectrum for compound **21**.



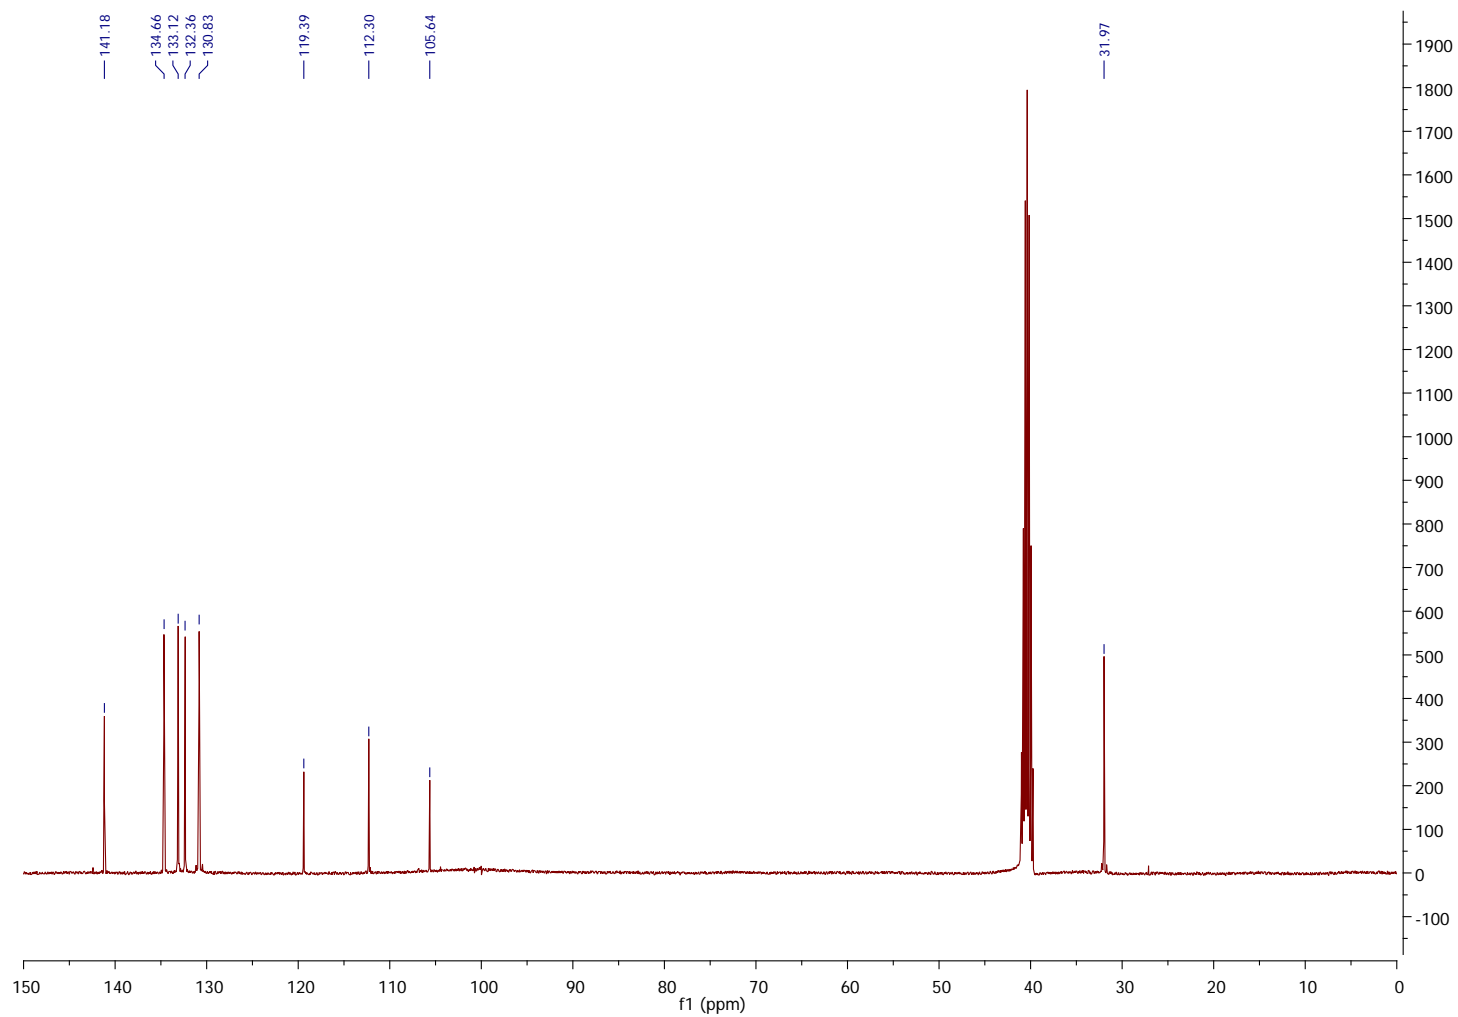

**Figure S42.**  $^{13}\text{C}$ -NMR spectrum for compound **21**.

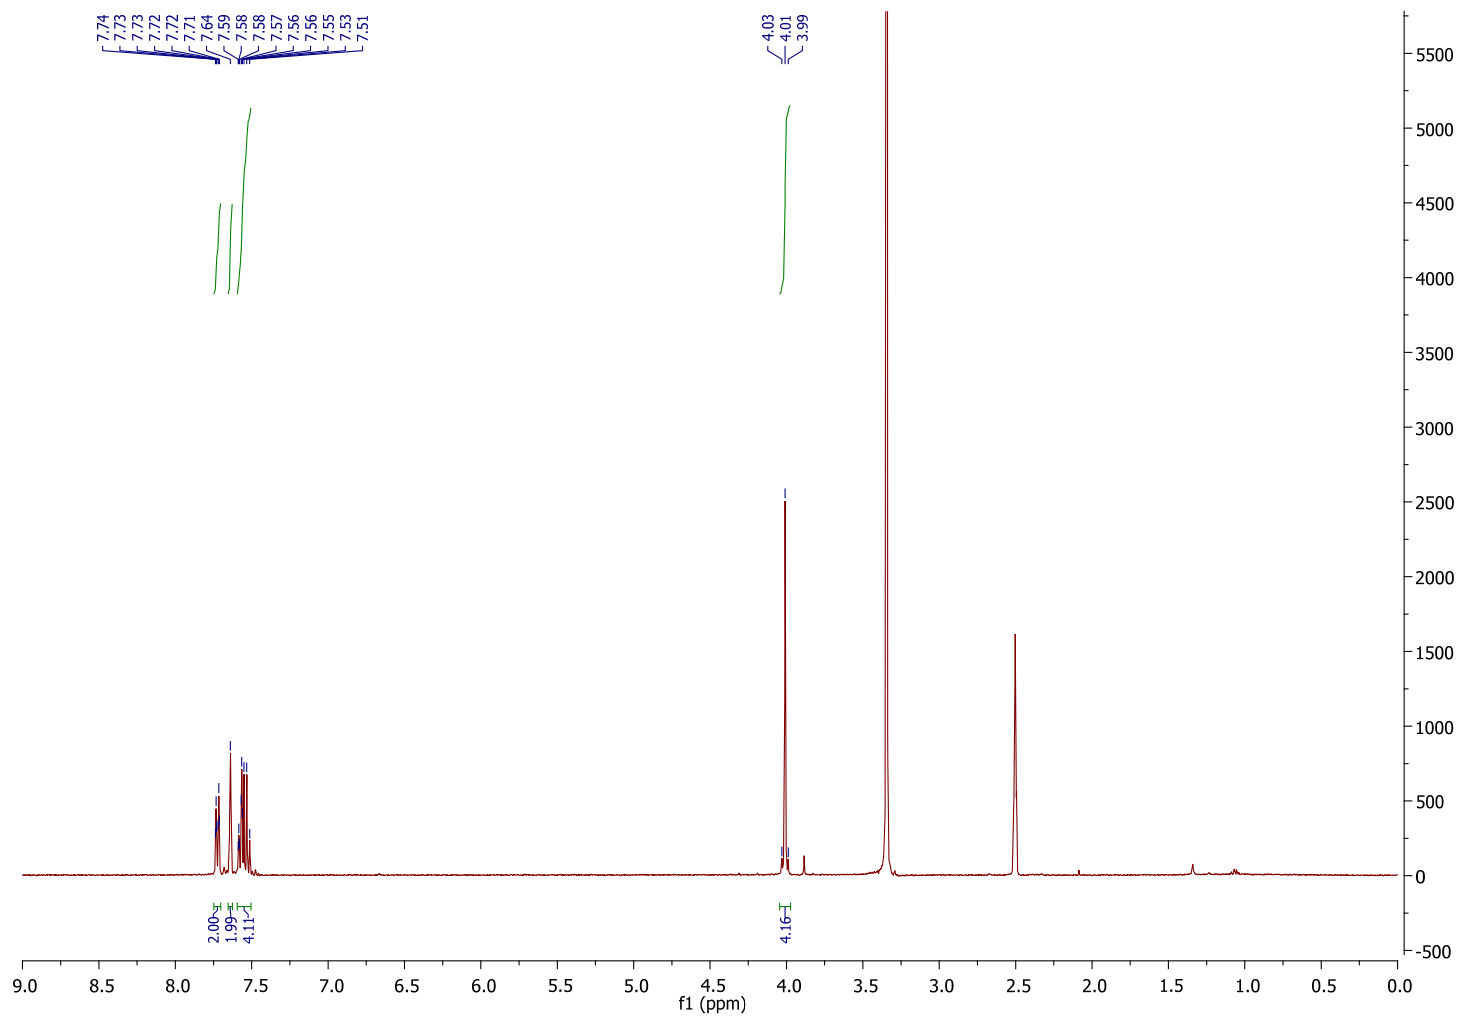

**Figure S43.**  $^1\text{H-NMR}$  spectrum for compound **22**.

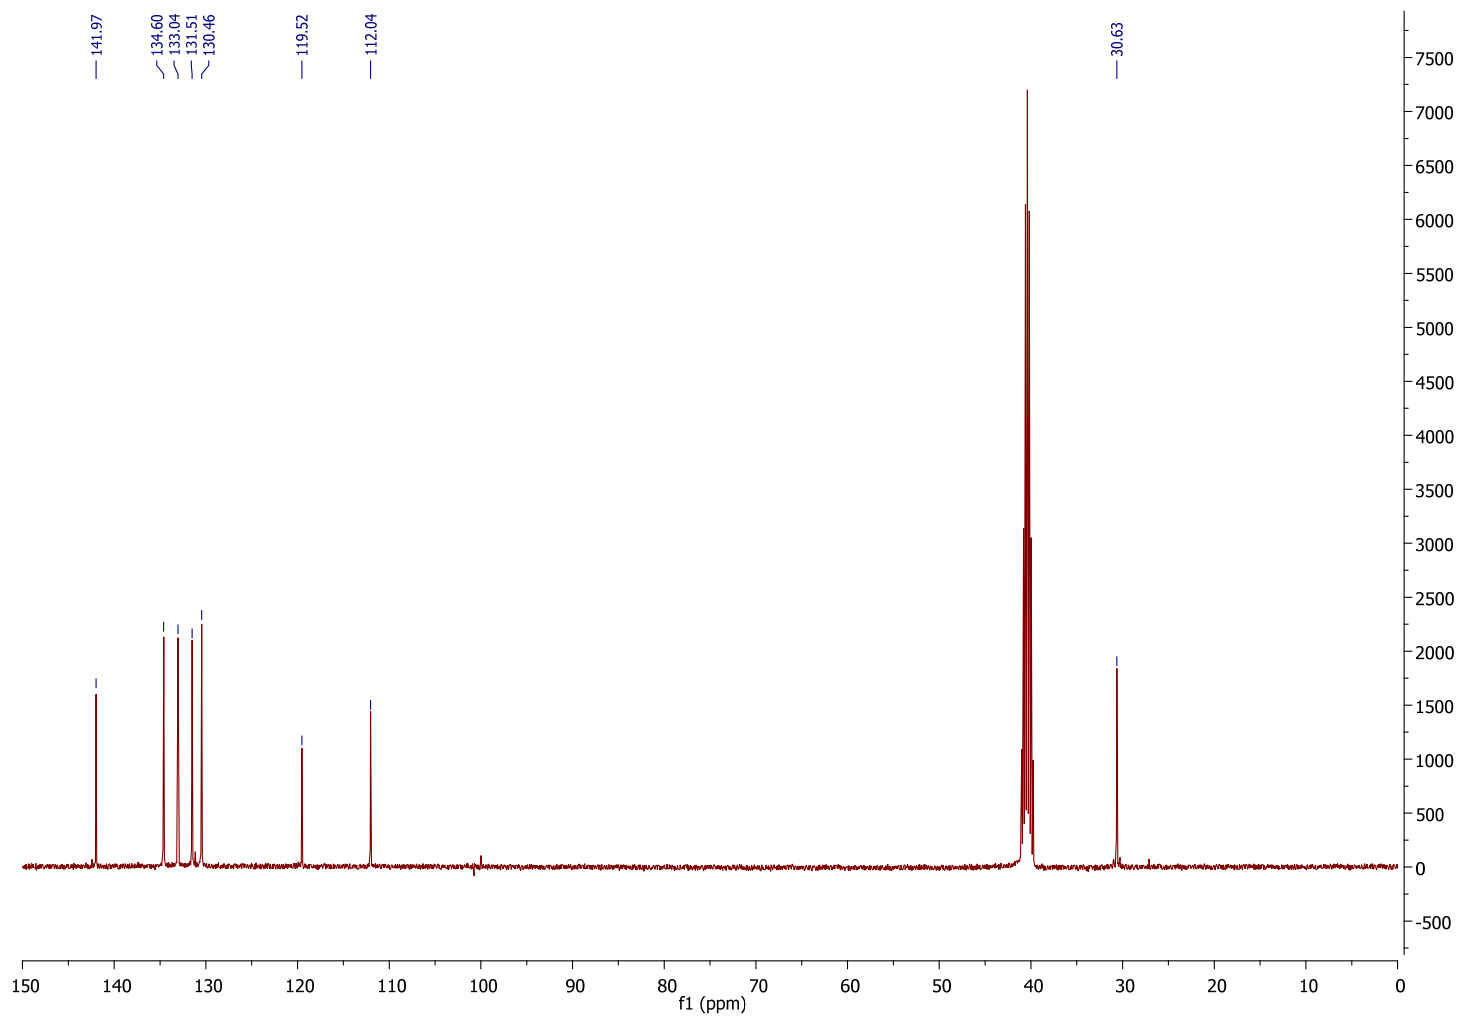

**Figure S44.**  $^{13}\text{C}$ -NMR spectrum for compound **22**.

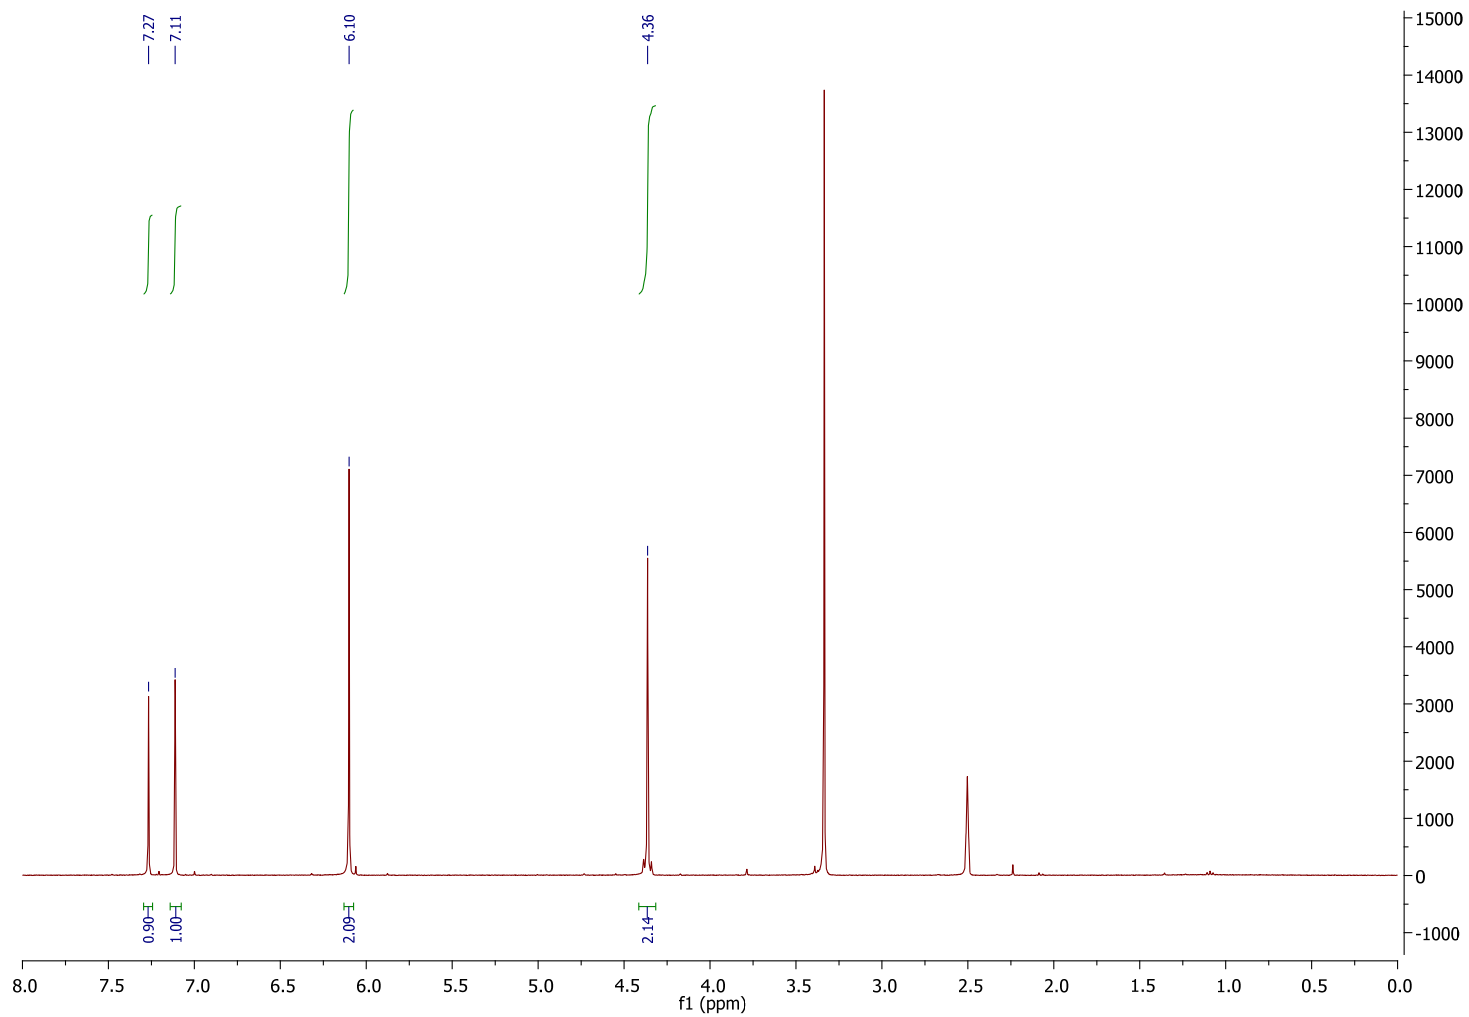

**Figure S45.** <sup>1</sup>H-NMR spectrum for compound **23**.

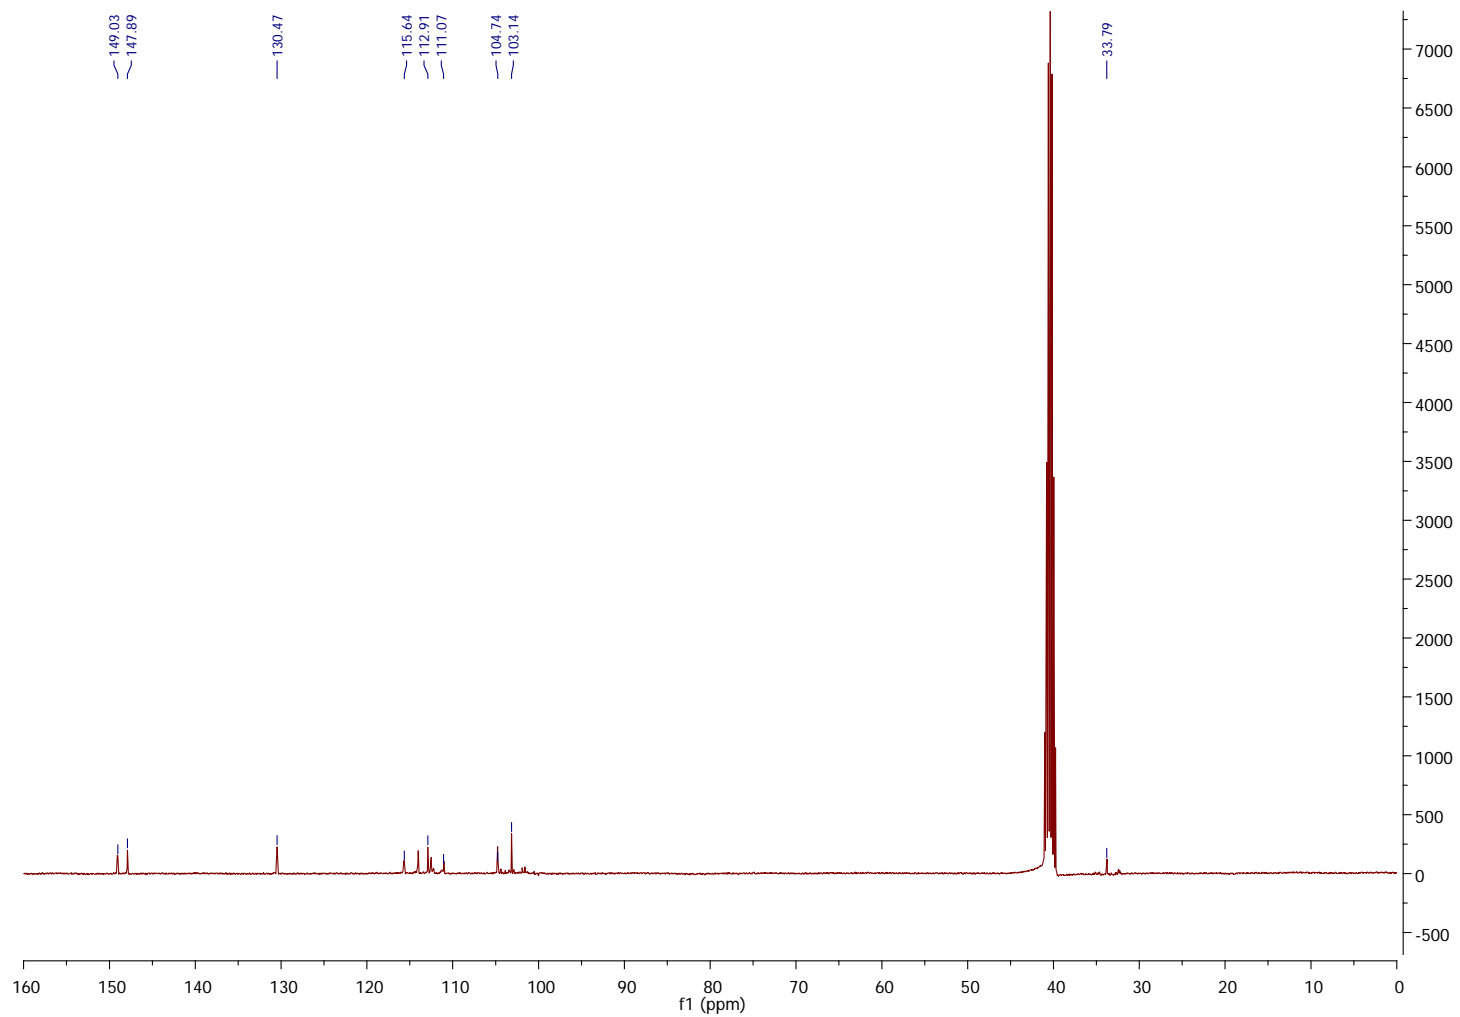

**Figure S46.**  $^{13}\text{C}$ -NMR spectrum for compound **23**.

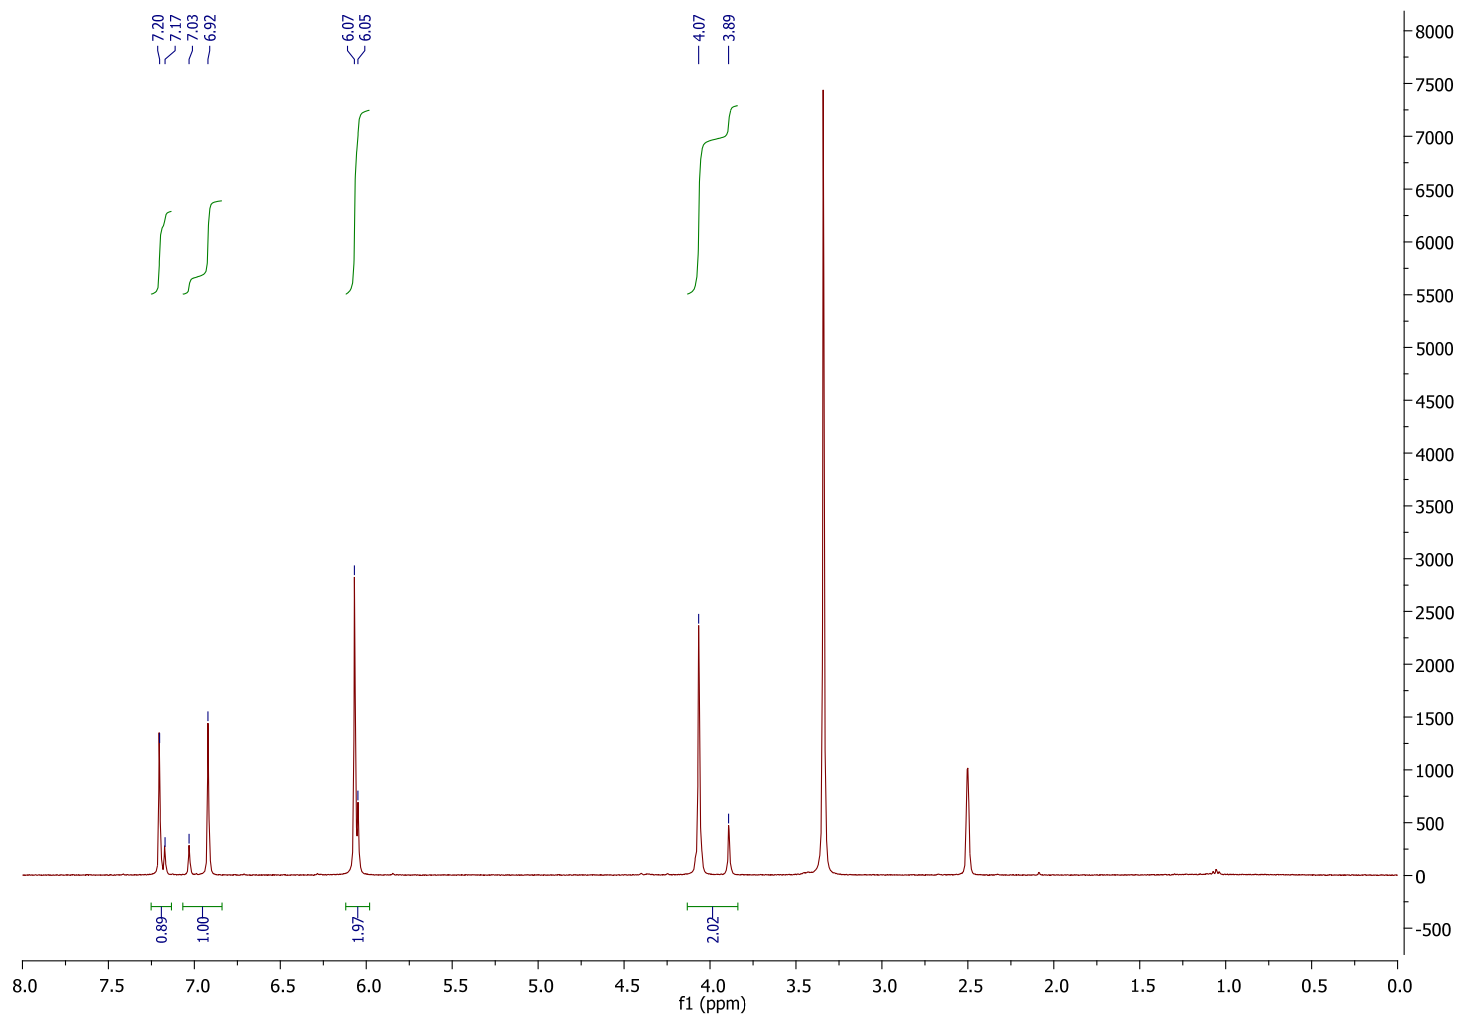

**Figure S47.** <sup>1</sup>H-NMR spectrum for compound **24**.

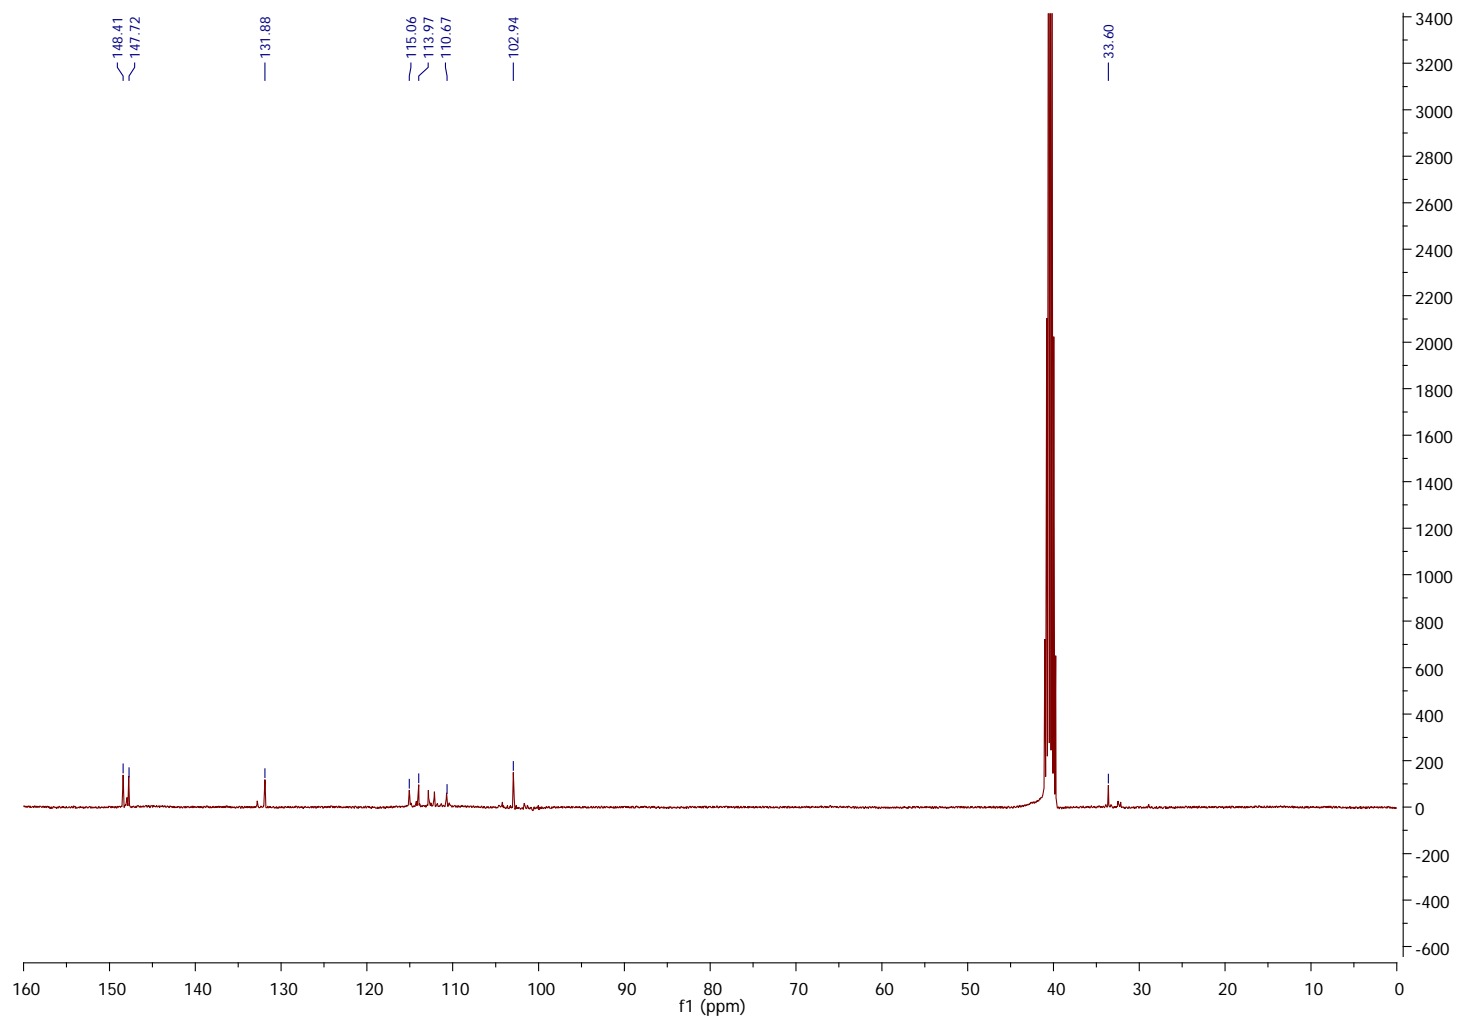

**Figure S48.**  $^{13}\text{C}$ -NMR spectrum for compound **24**.

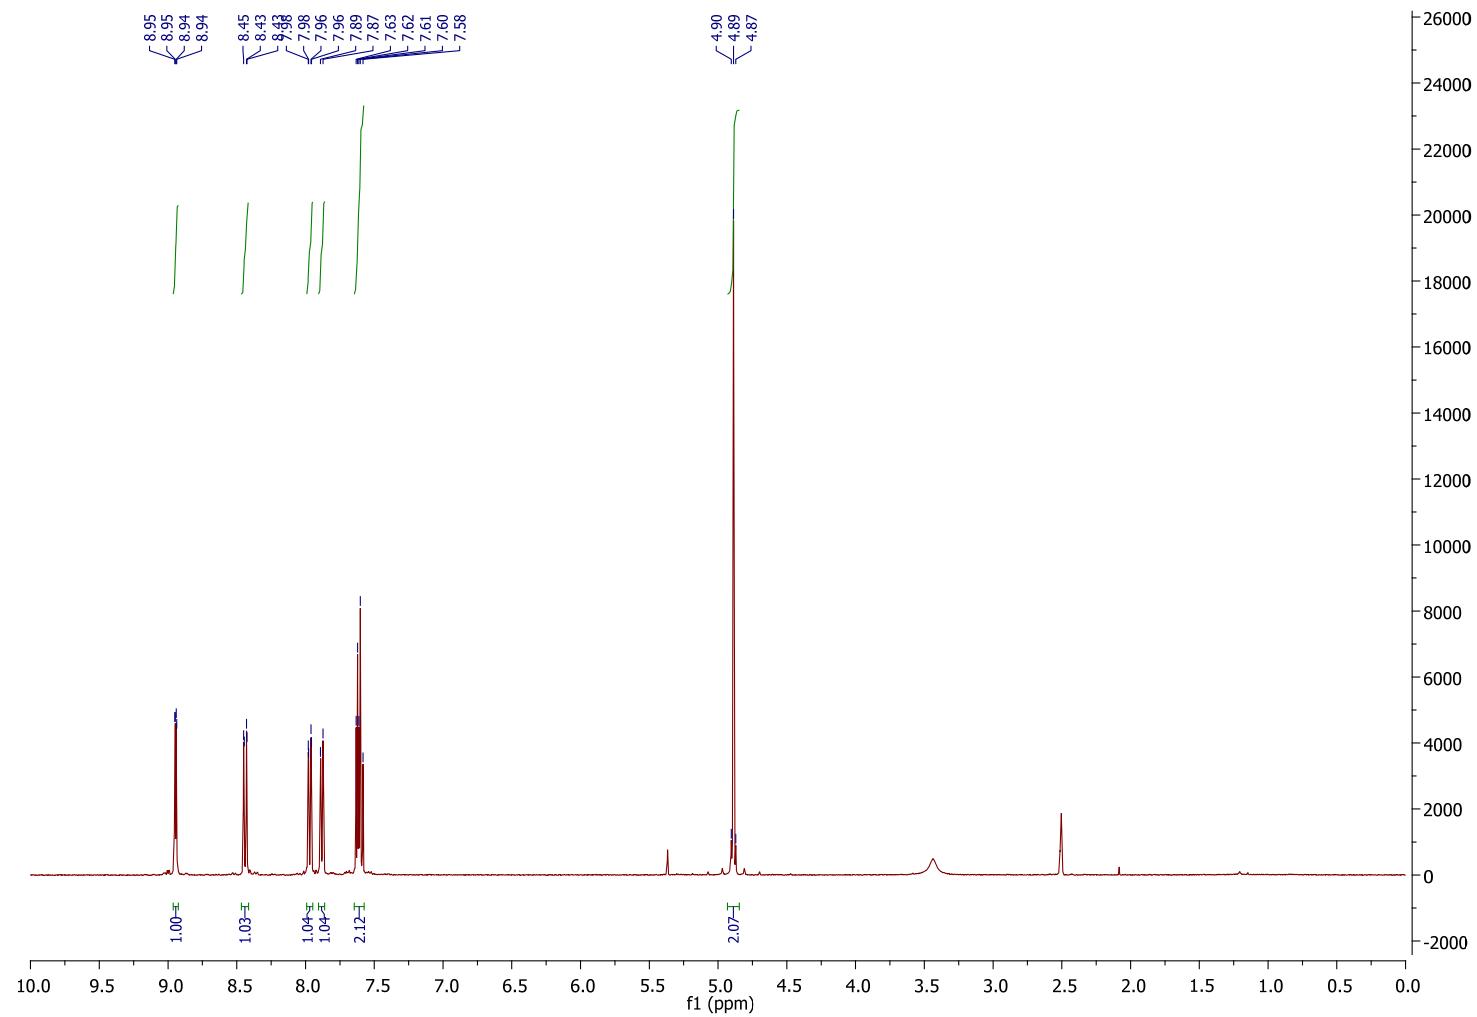

**Figure S49.**  $^1\text{H-NMR}$  spectrum for compound **25**.



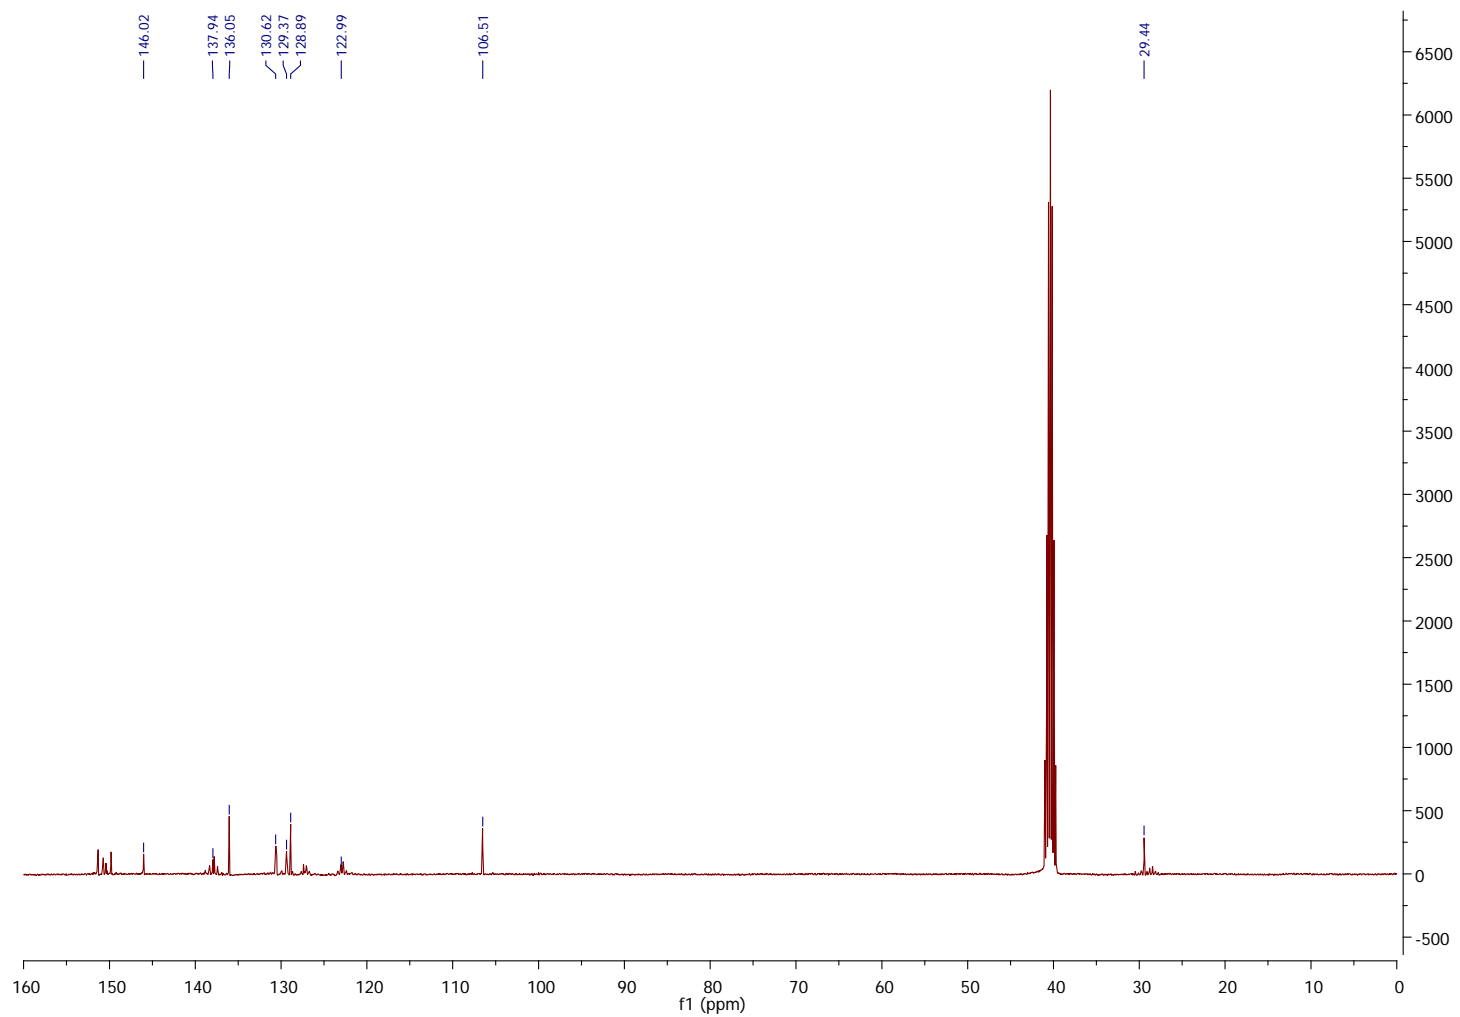

**Figure S50.**  $^{13}\text{C}$ -NMR spectrum for compound **25**.

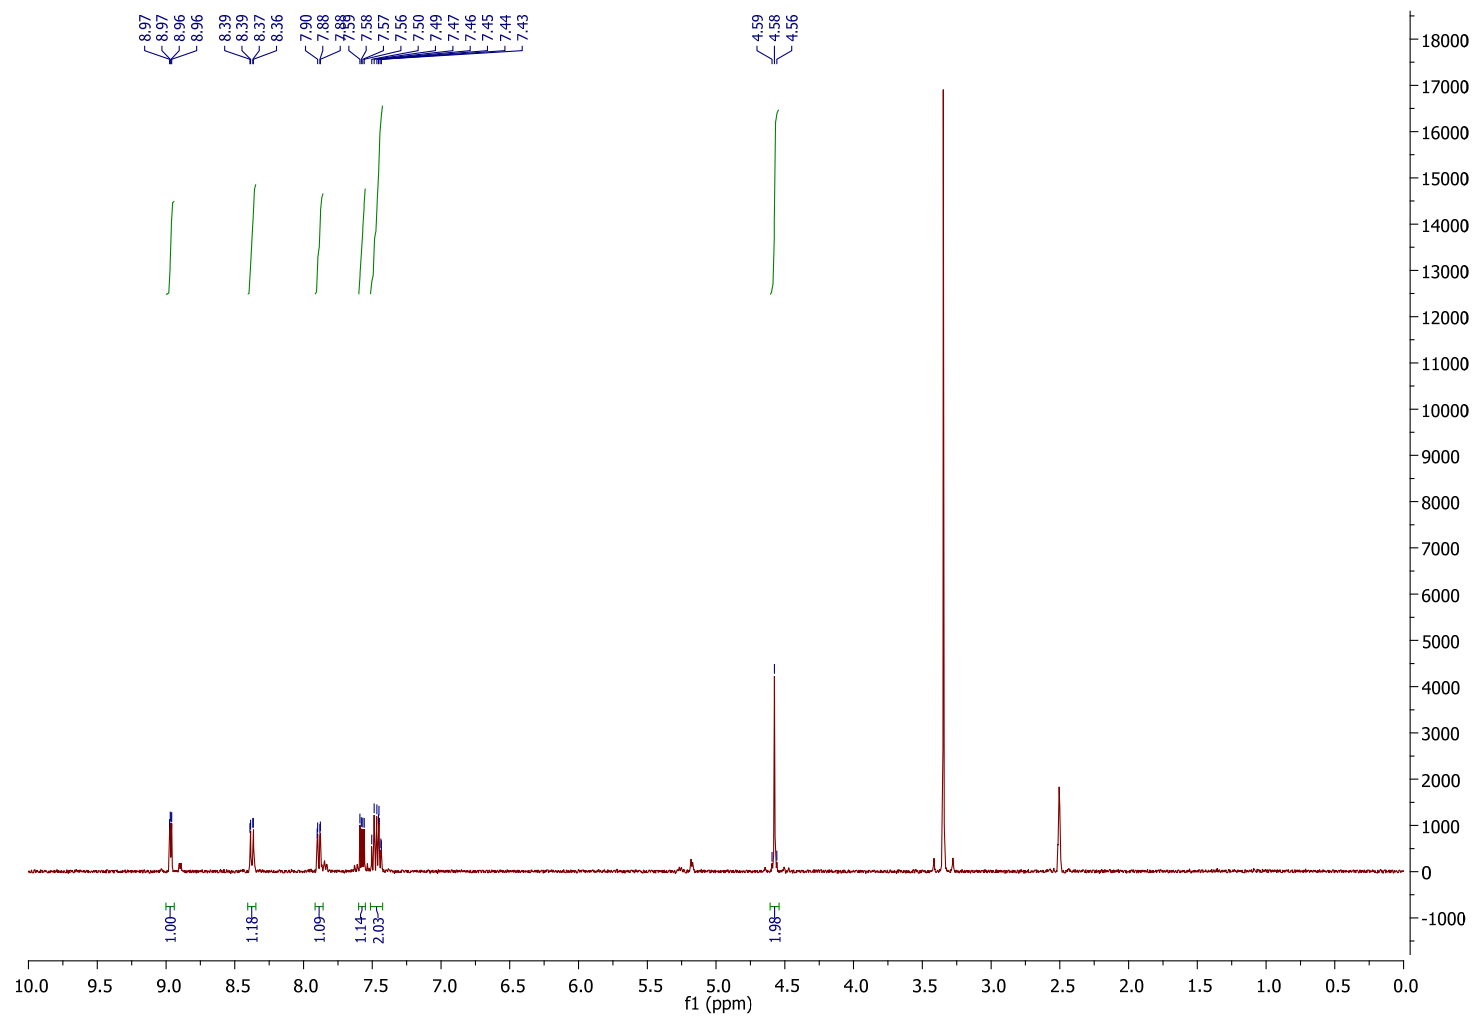

**Figure S51.** <sup>1</sup>H-NMR spectrum for compound **26**.

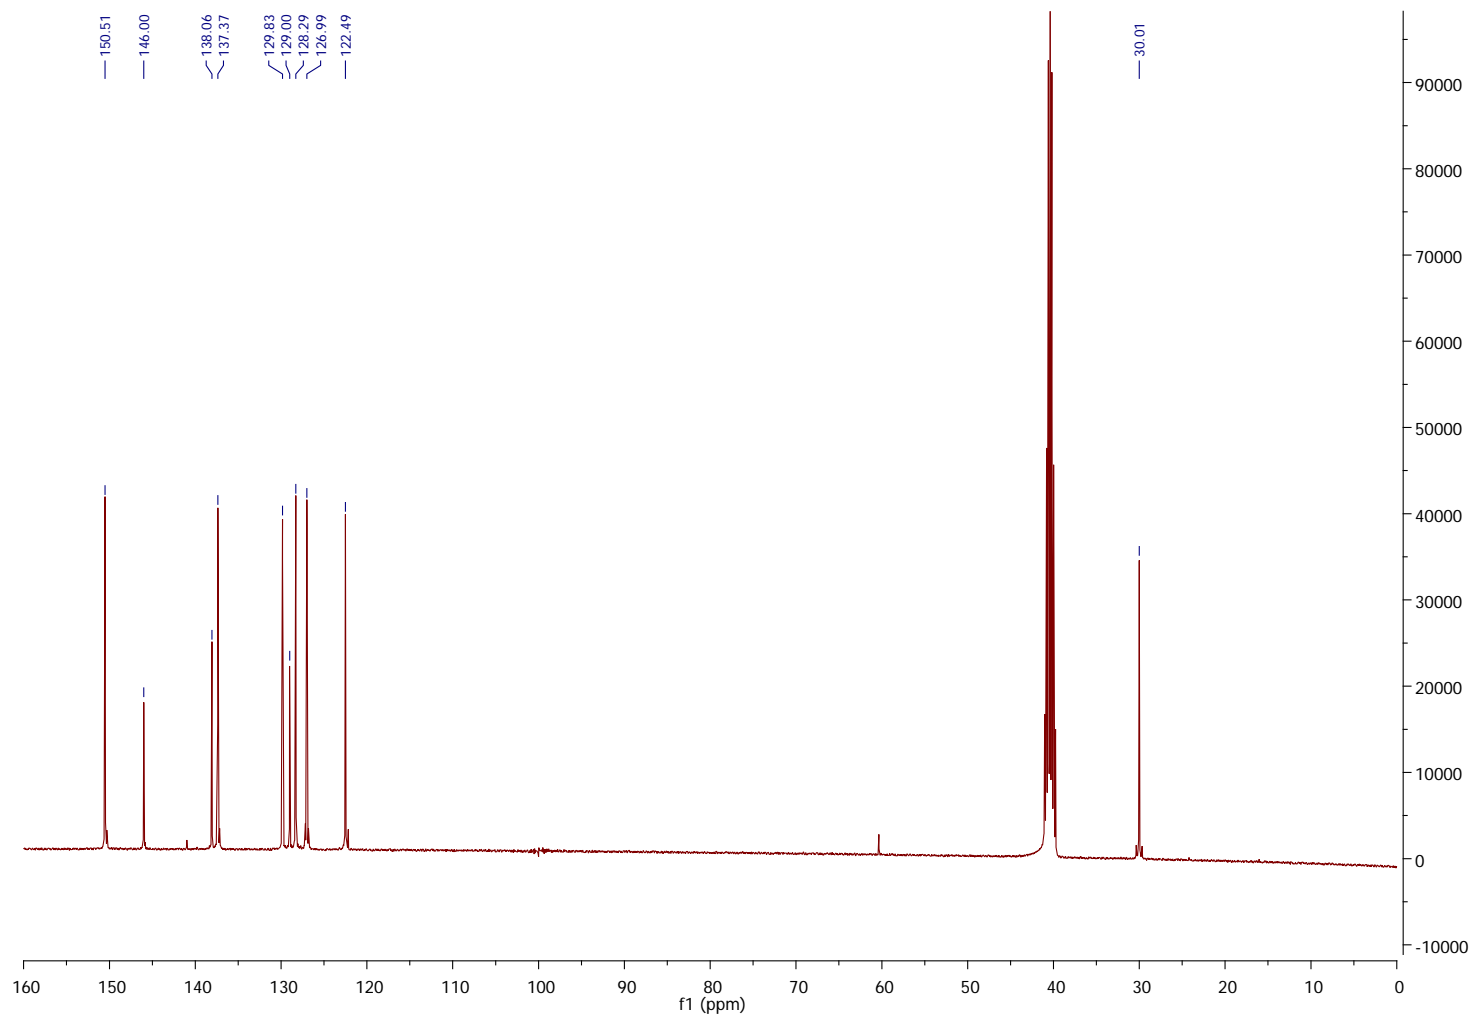

**Figure S52.**  $^{13}\text{C}$ -NMR spectrum for compound **26**.

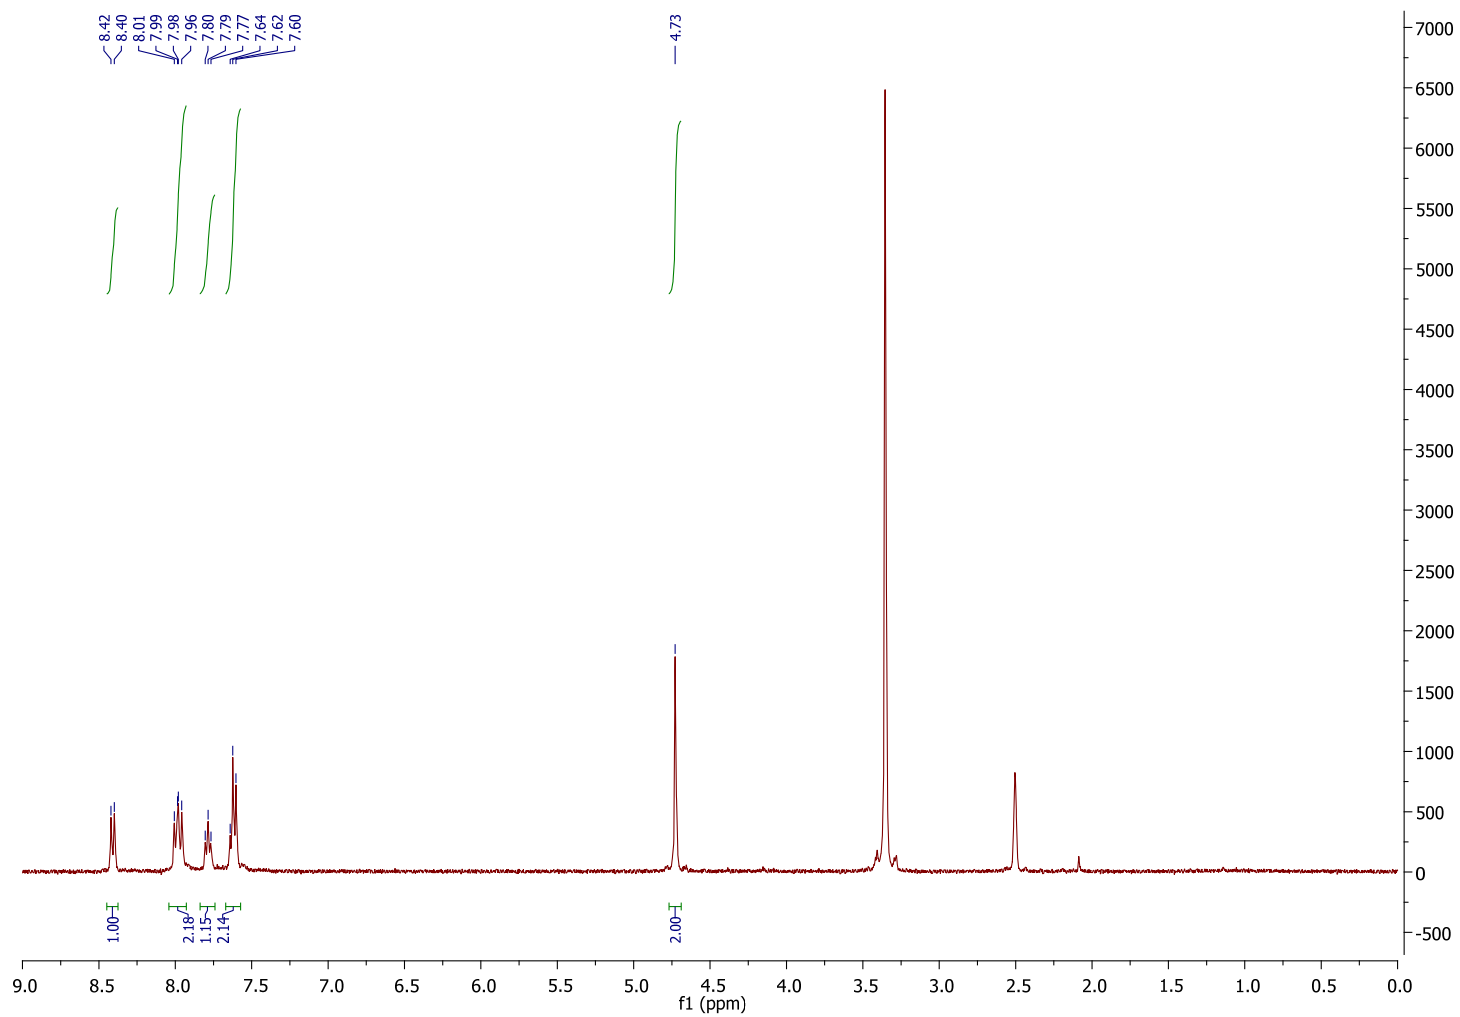

Figure S53.  $^1\text{H}$ -NMR spectrum for compound **27**.

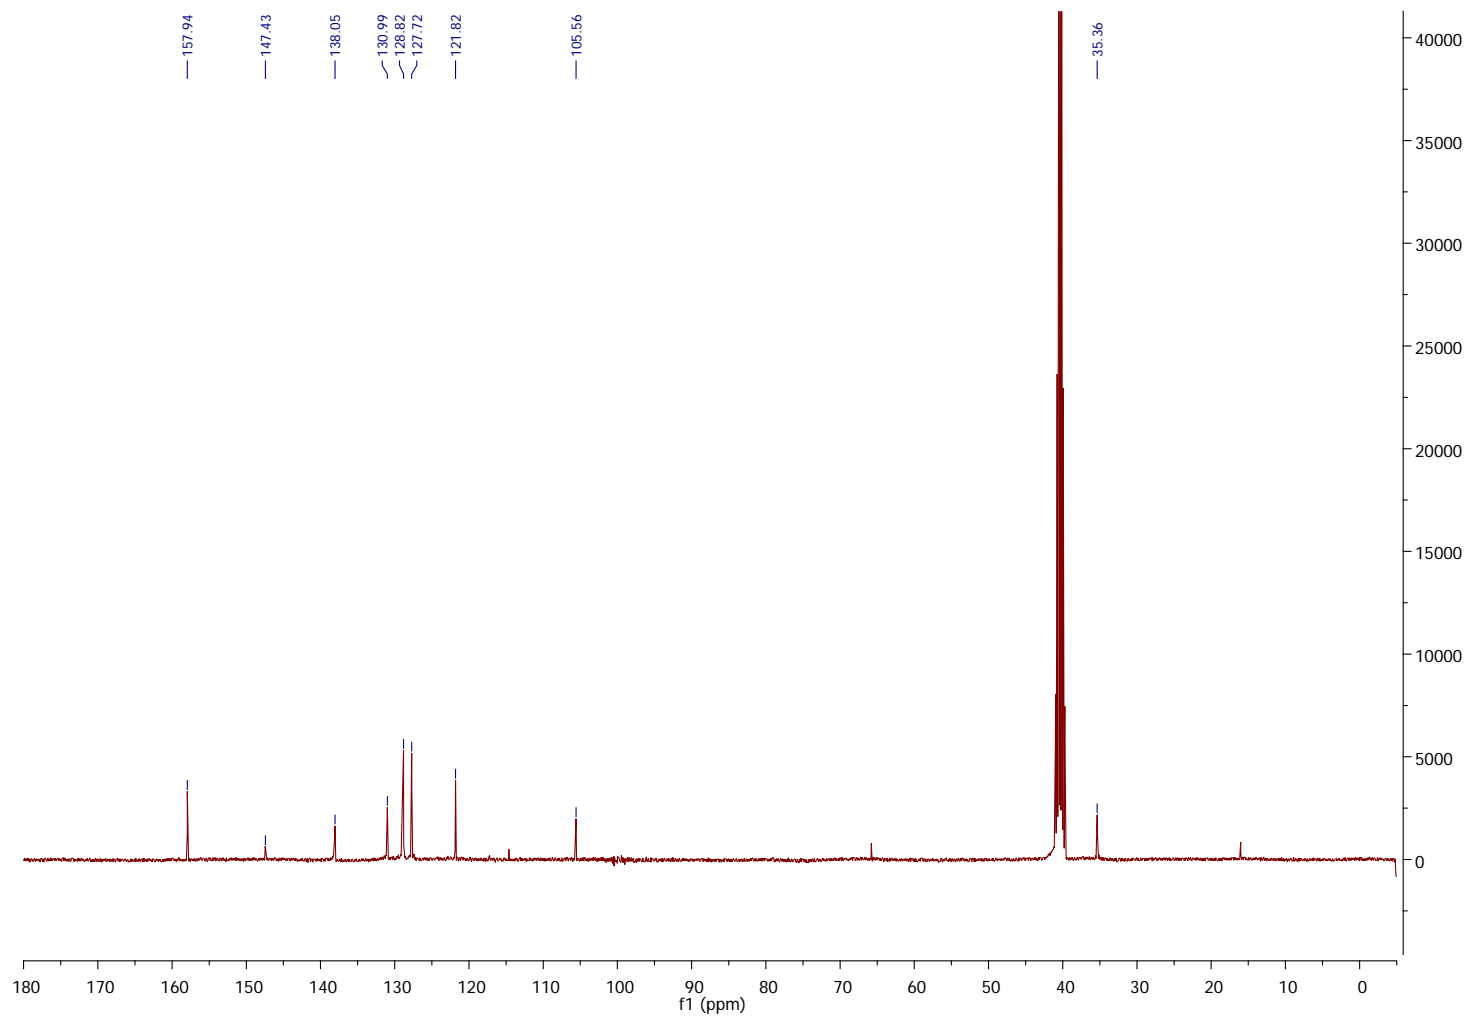

**Figure S54.**  $^{13}\text{C}$ -NMR spectrum for compound 27.

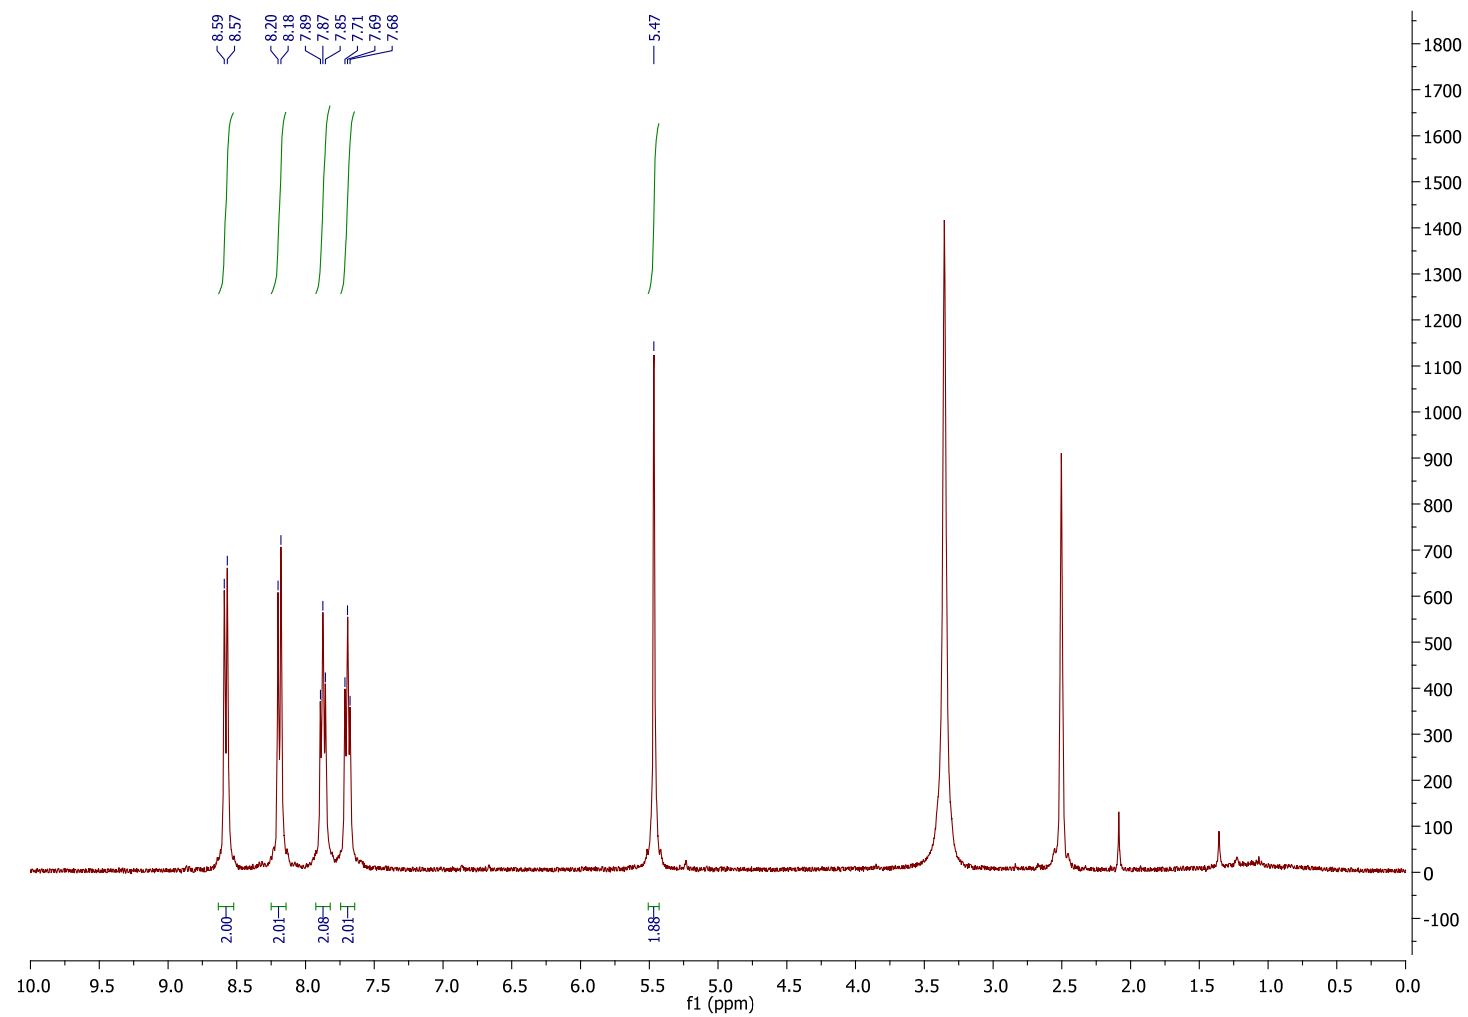

**Figure S55.**  $^1\text{H}$ -NMR spectrum for compound **28**.

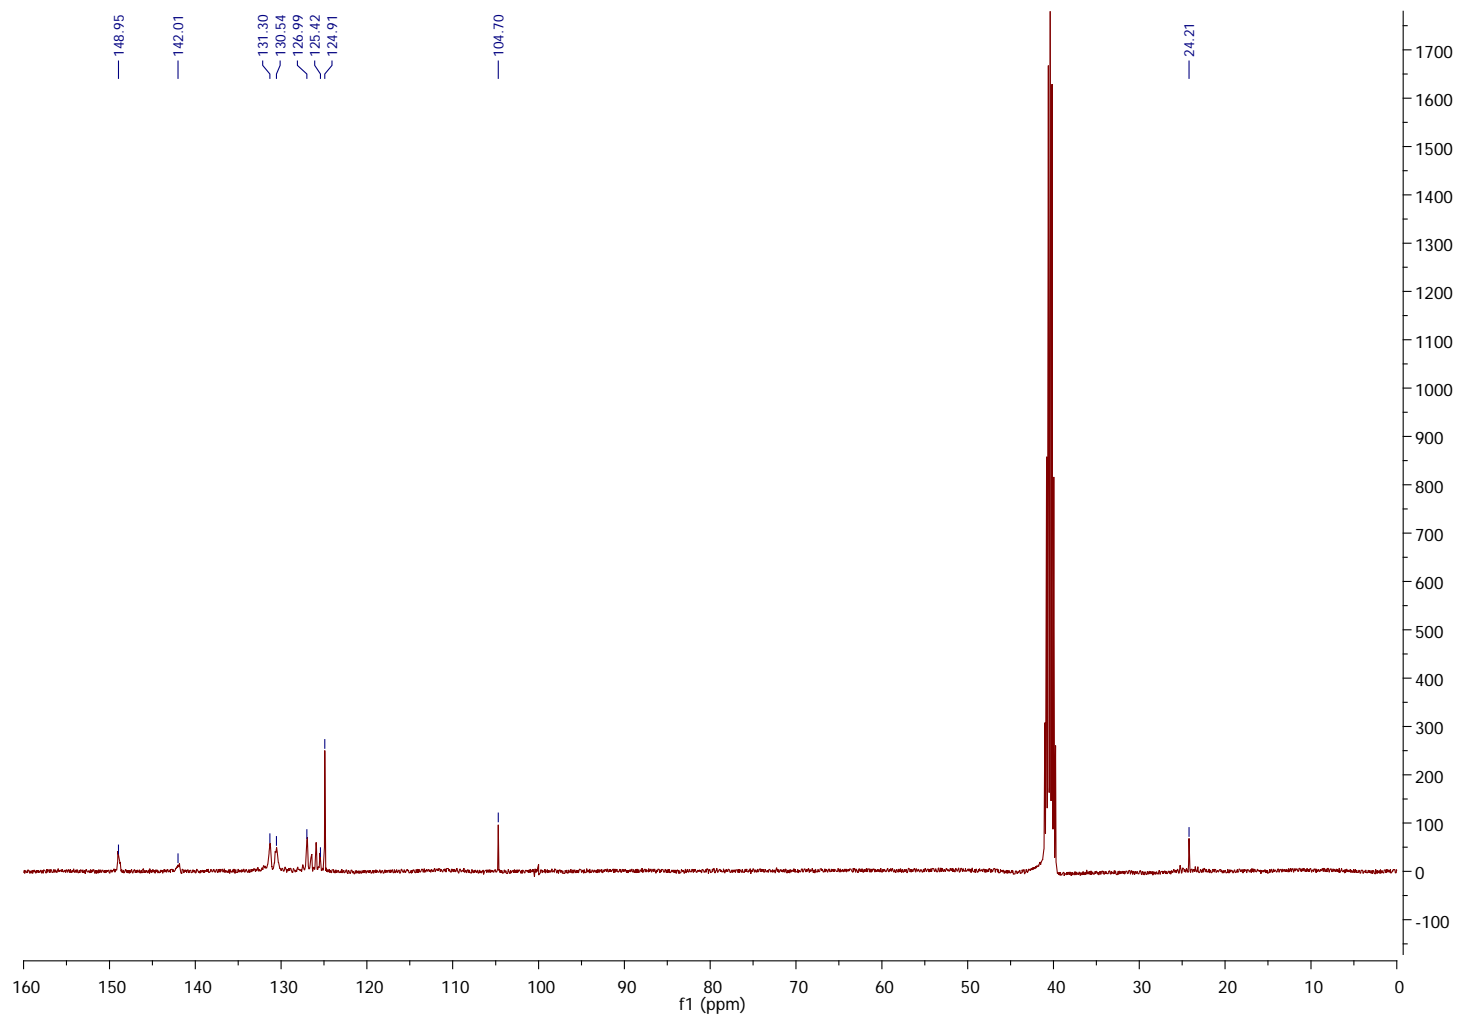

**Figure S56.**  $^{13}\text{C}$ -NMR spectrum for compound **28**.

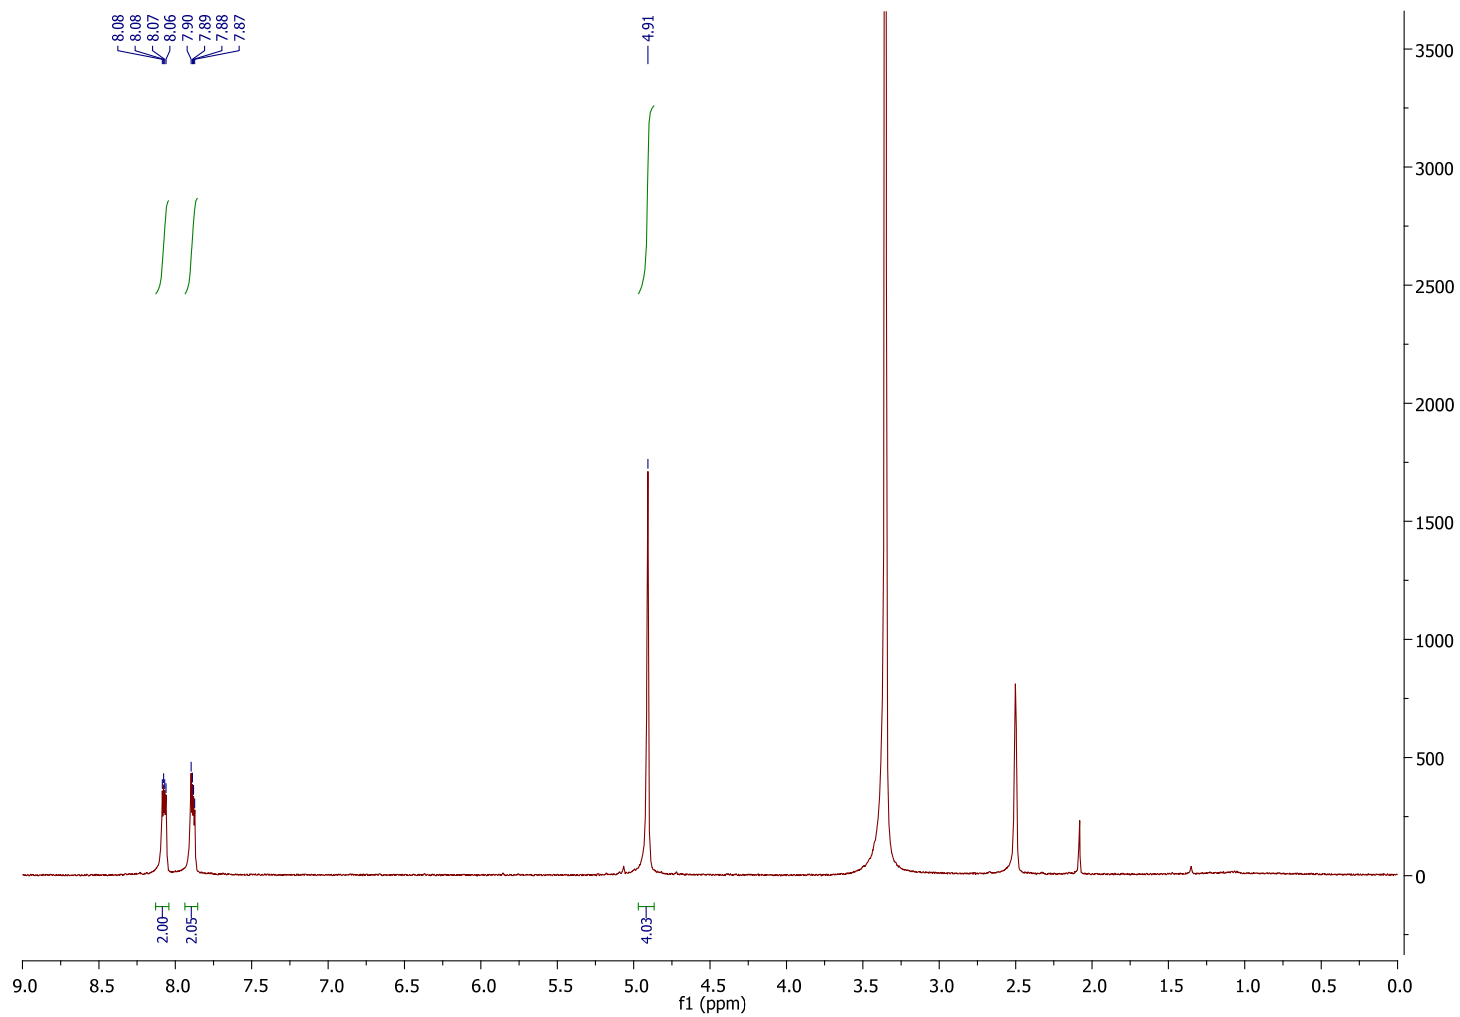

**Figure S57.**  $^1\text{H}$ -NMR spectrum for compound **29**.



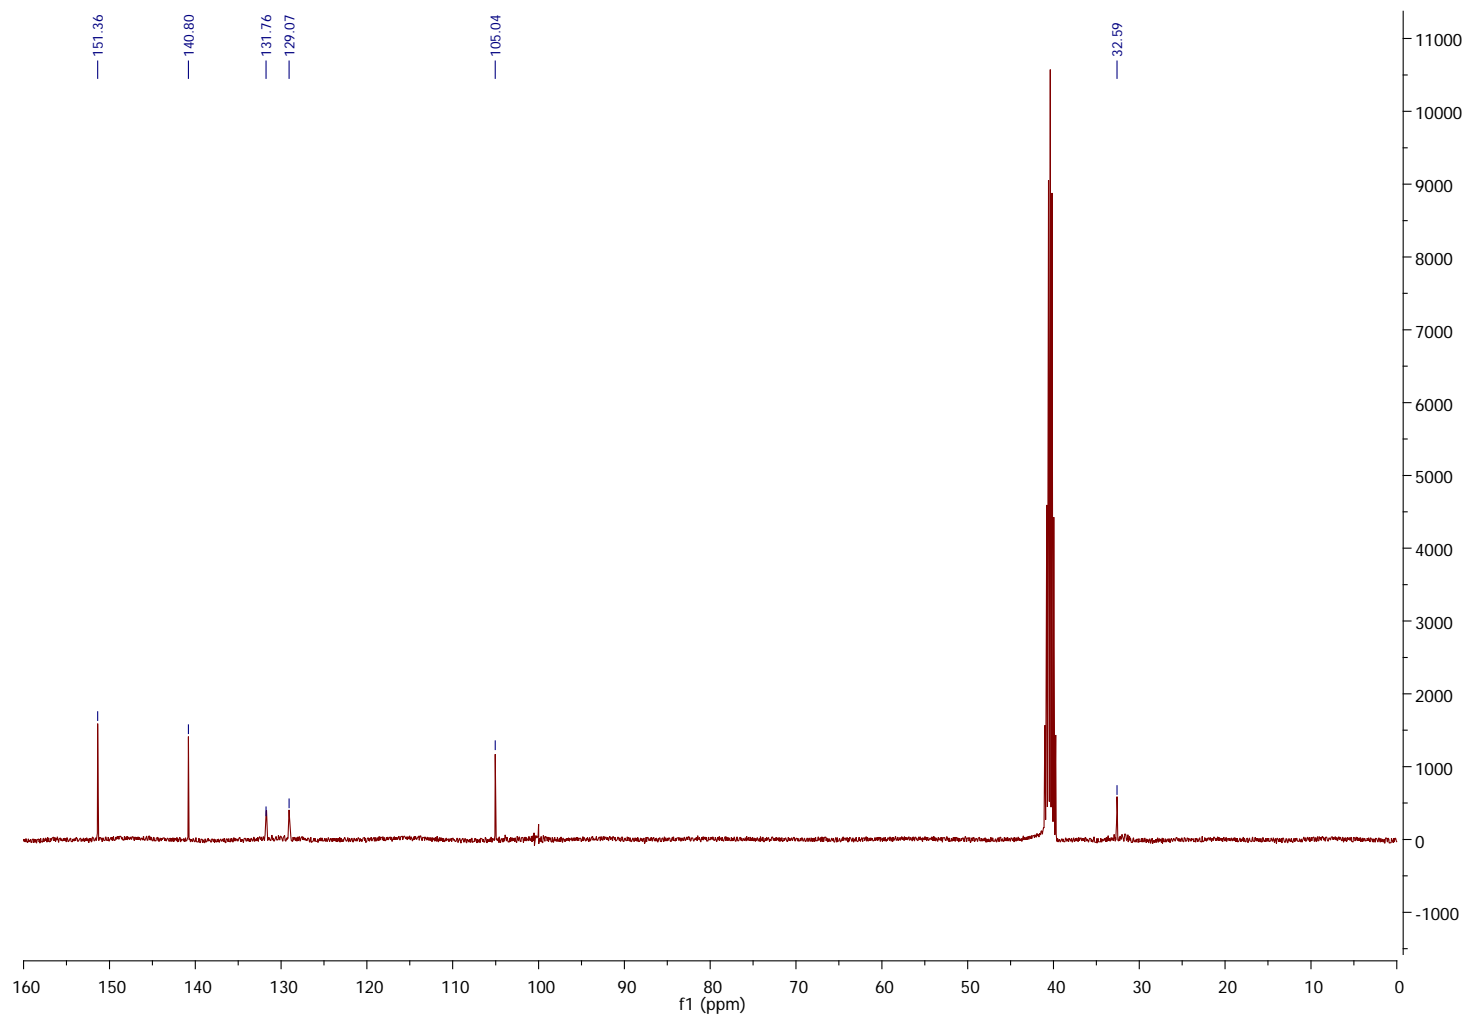

**Figure S58.**  $^{13}\text{C}$ -NMR spectrum for compound **29**.

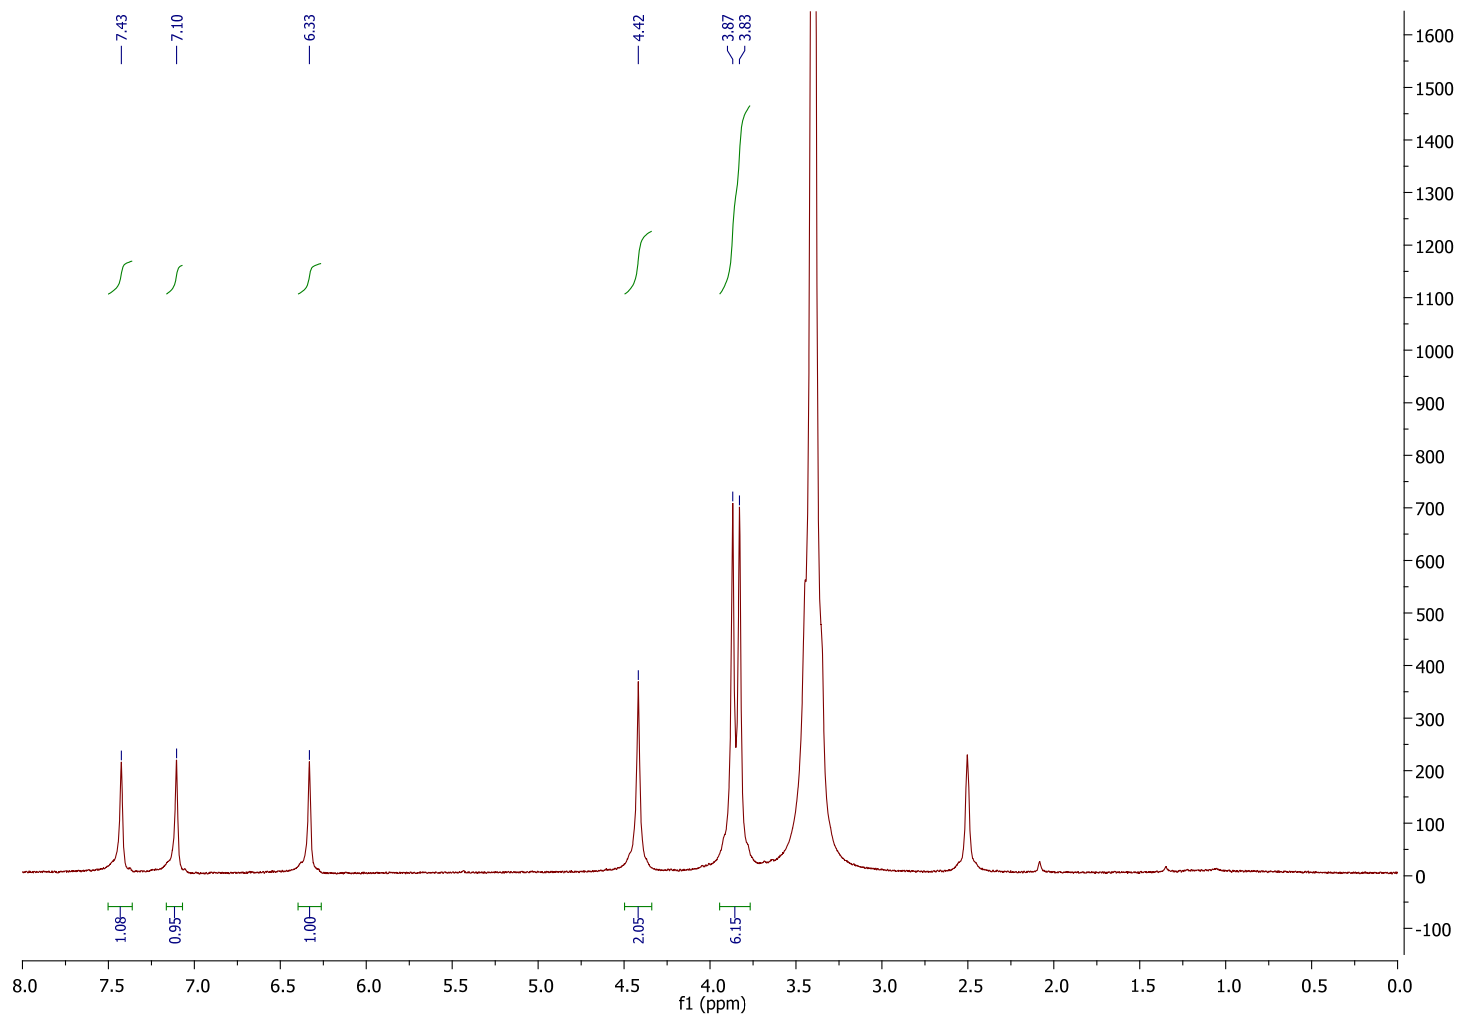

**Figure S59.** <sup>1</sup>H-NMR spectrum for compound **30**.

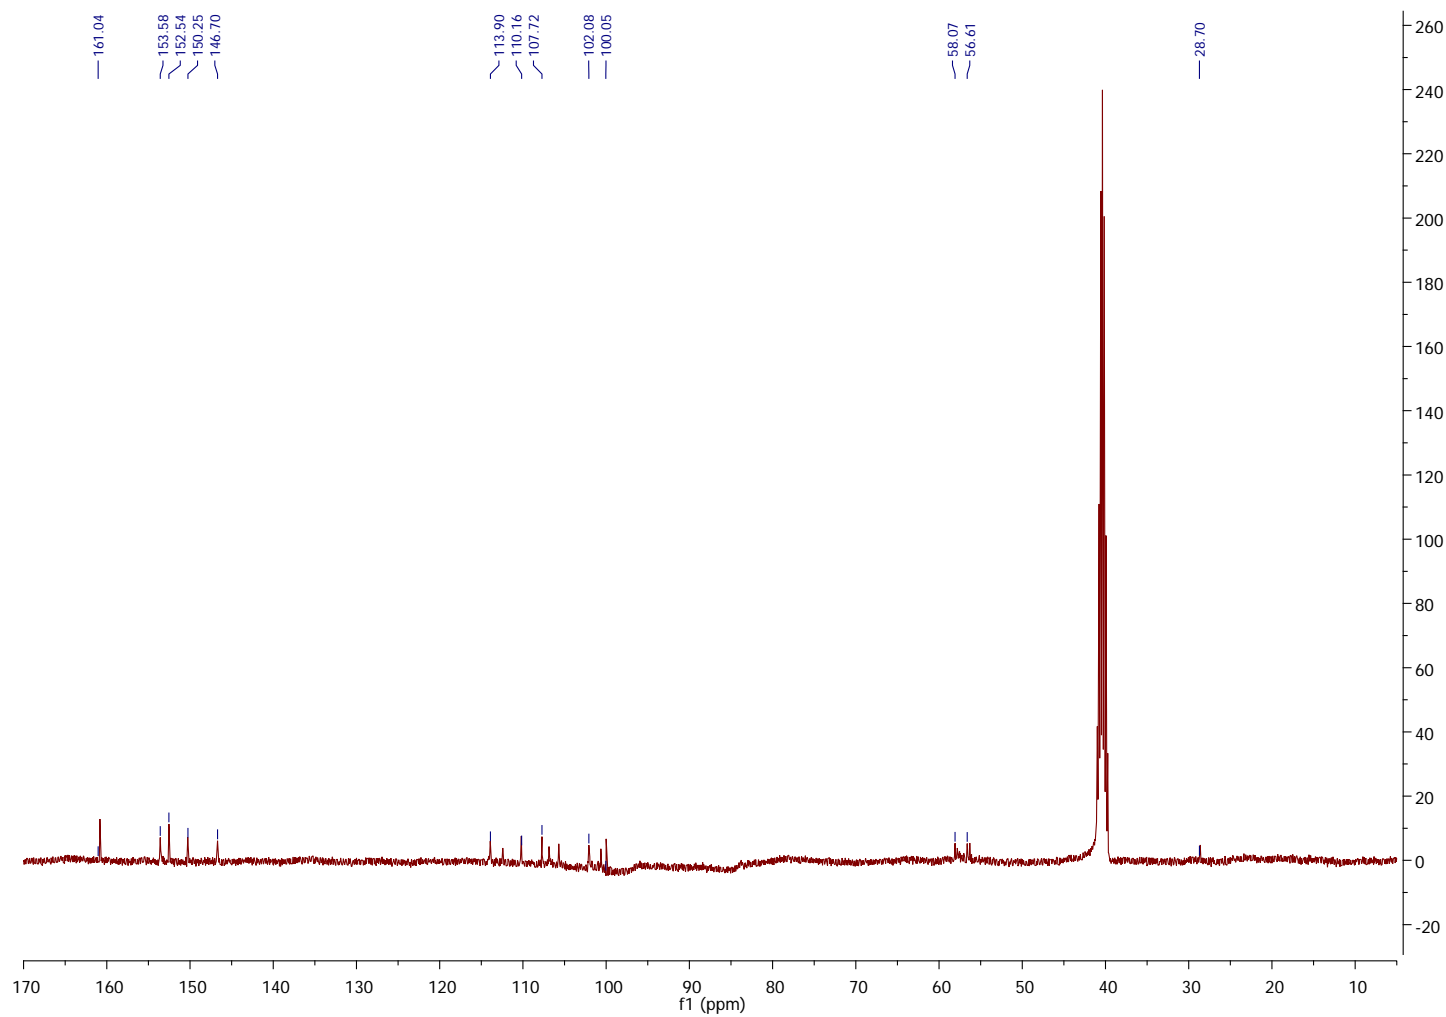

**Figure S60.**  $^{13}\text{C}$ -NMR spectrum for compound **30**.

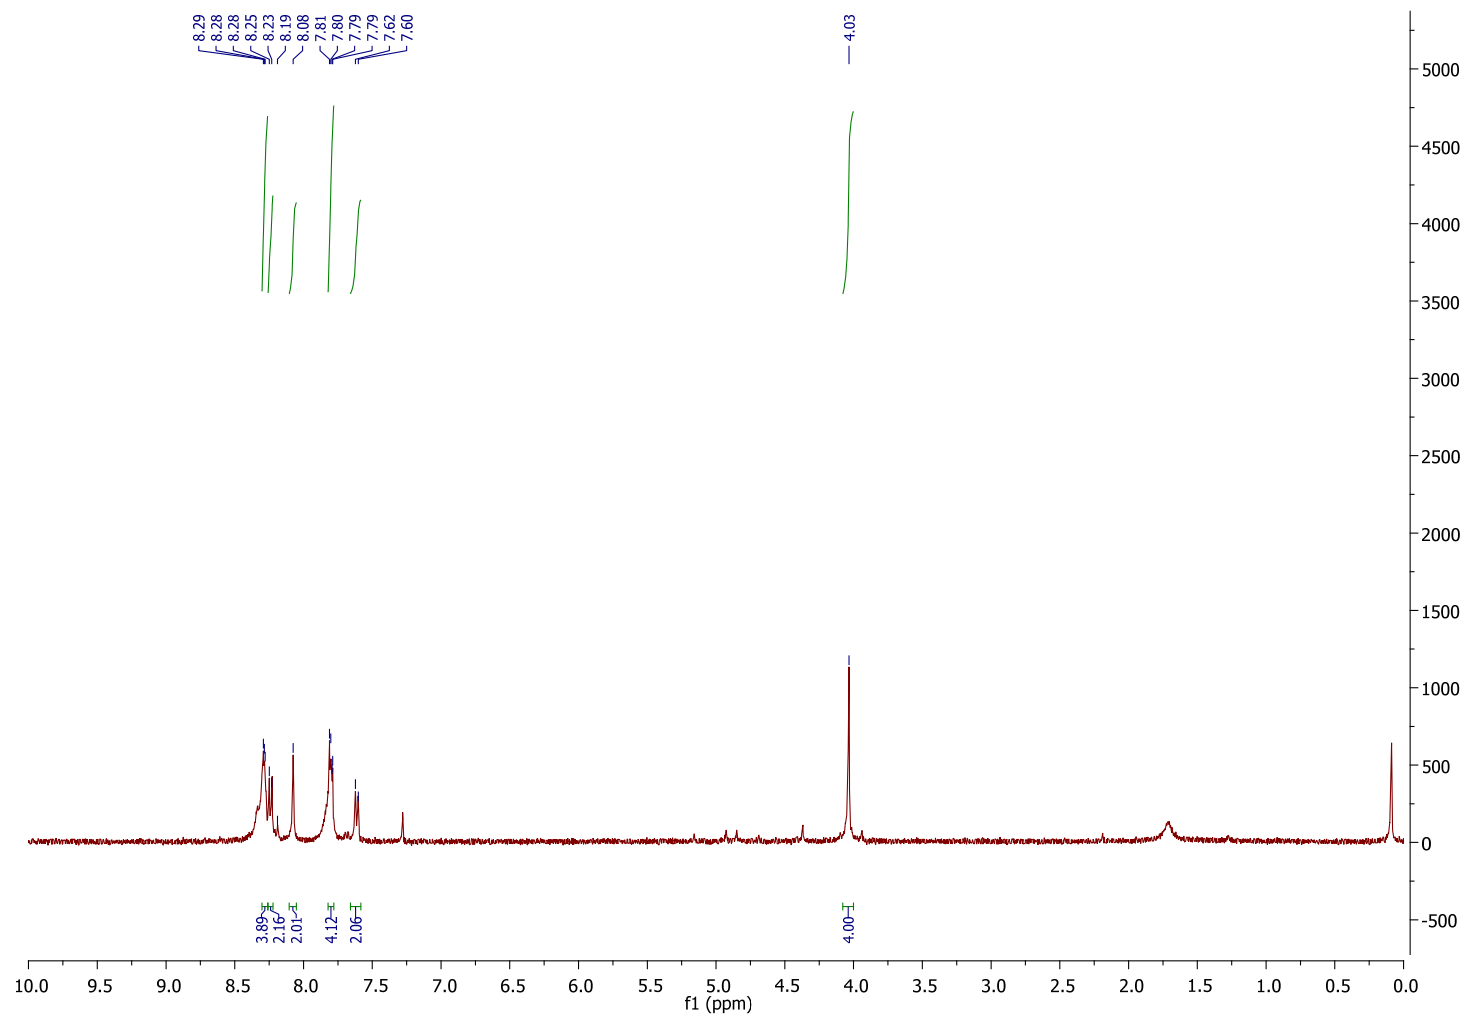

Figure S61.  $^1\text{H-NMR}$  spectrum for compound 31.

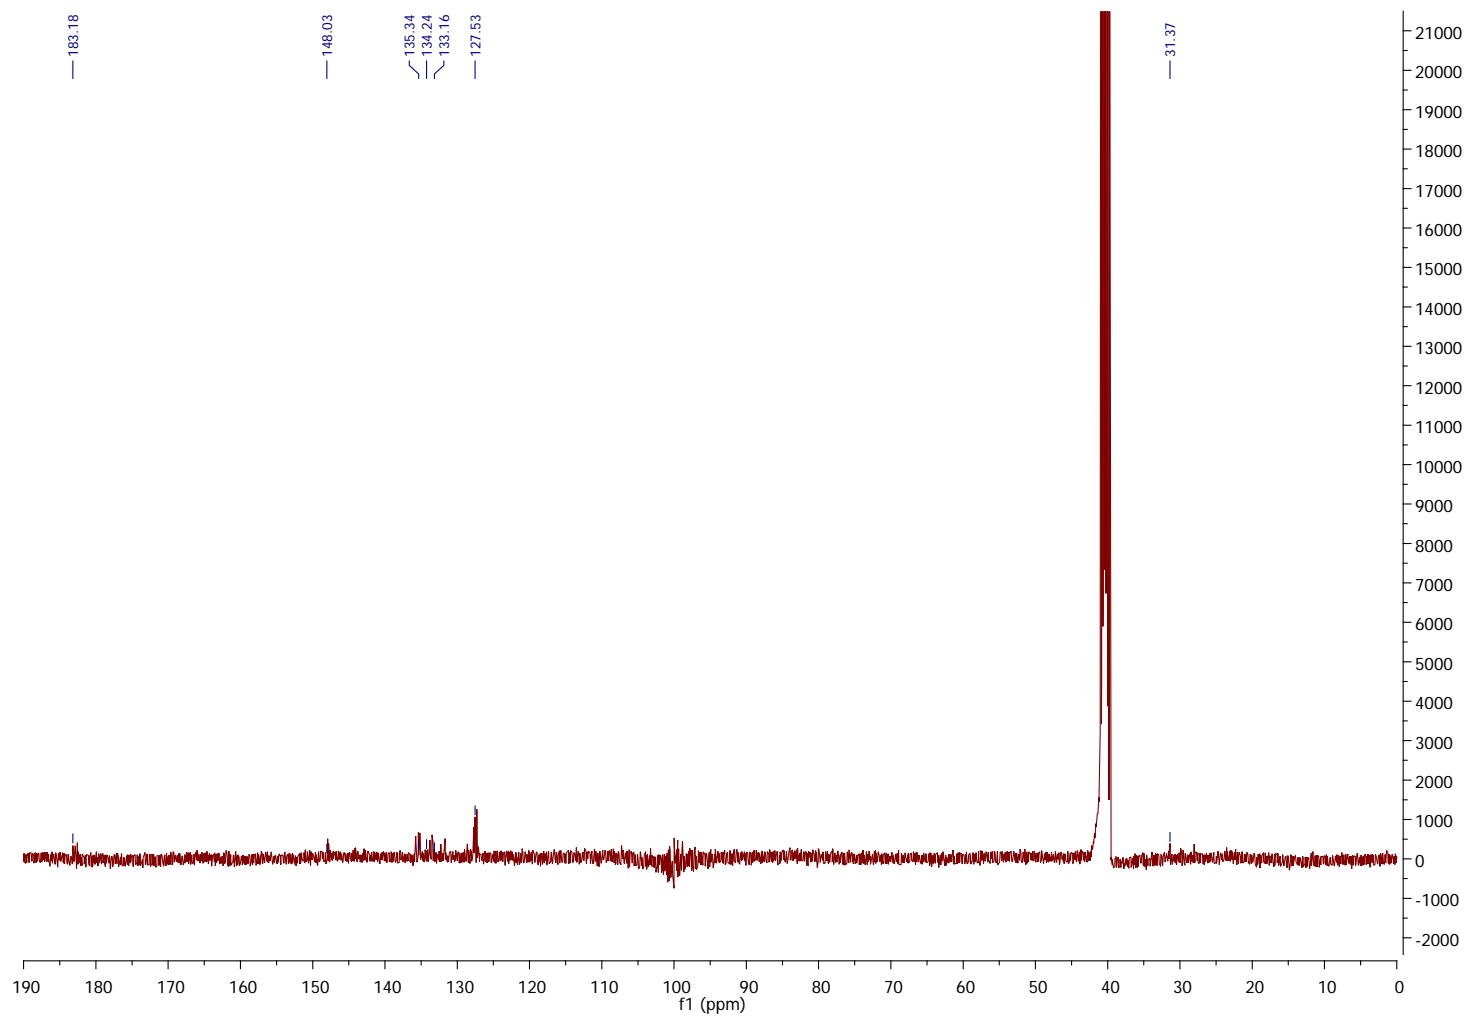

**Figure S62.**  $^{13}\text{C}$ -NMR spectrum for compound **31**.

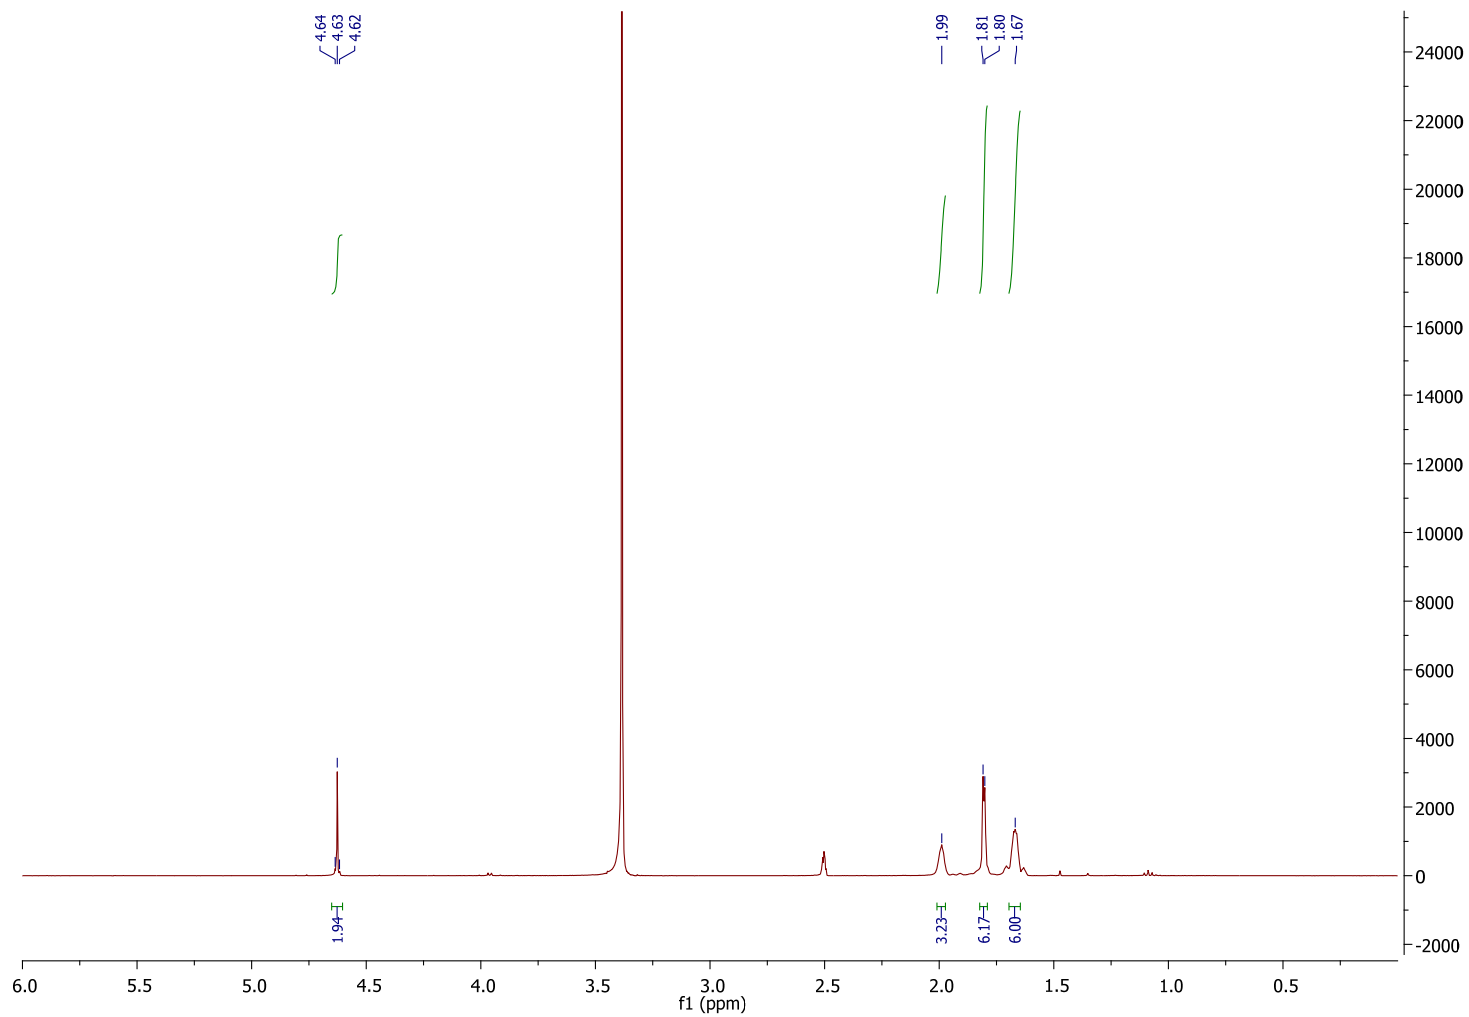

Figure S63. <sup>1</sup>H-NMR spectrum for compound 32.

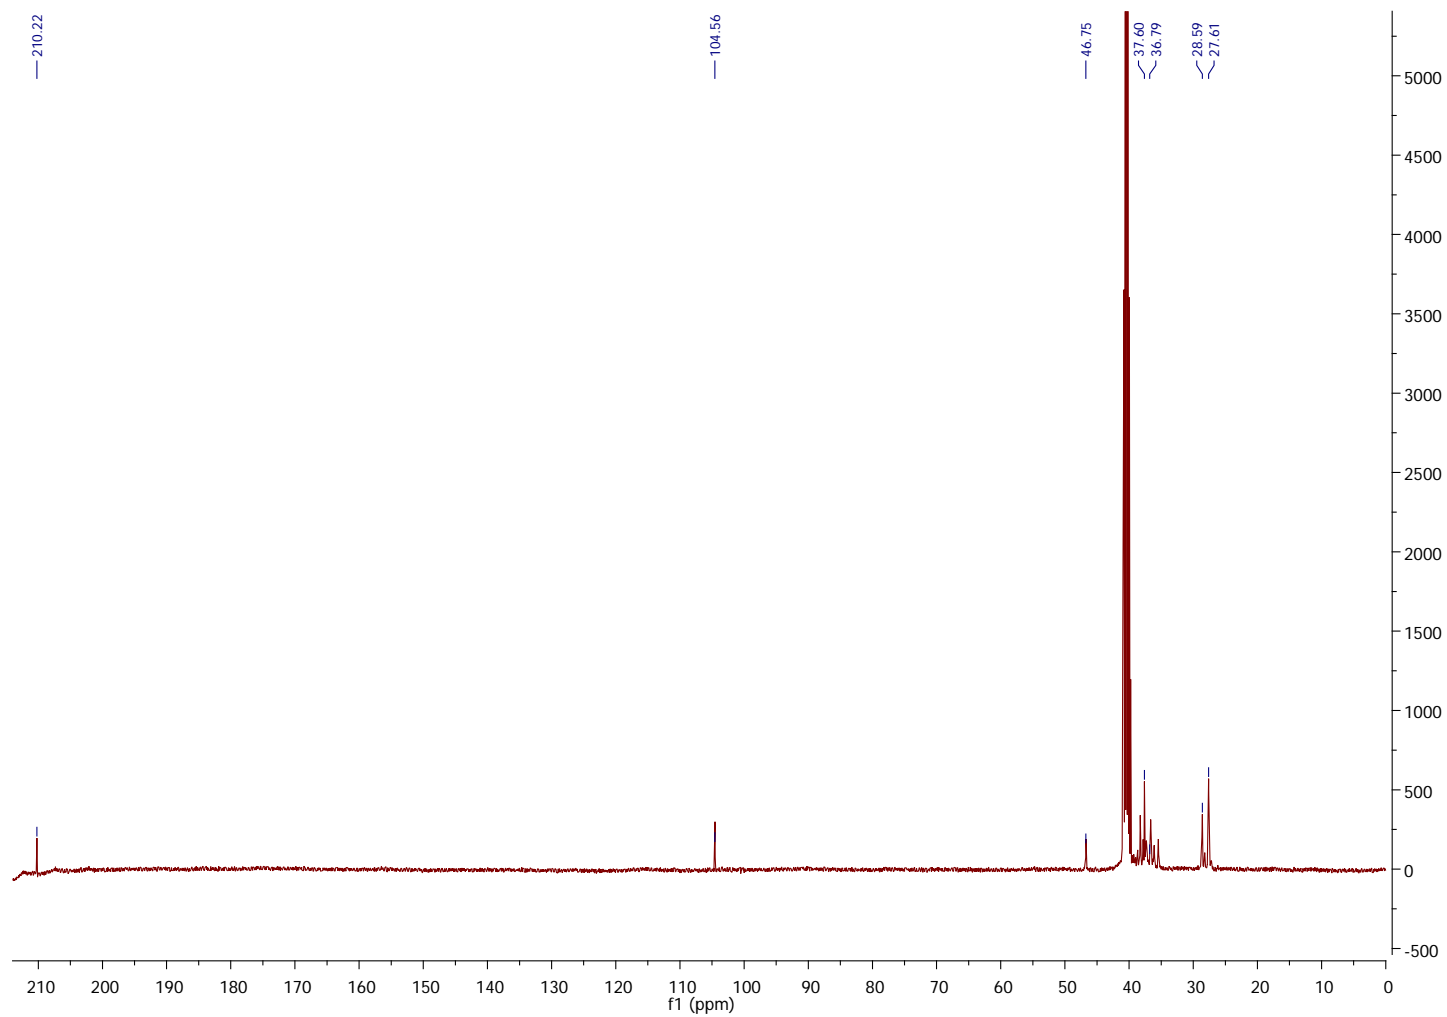

**Figure S64.**  $^{13}\text{C}$ -NMR spectrum for compound **32**.

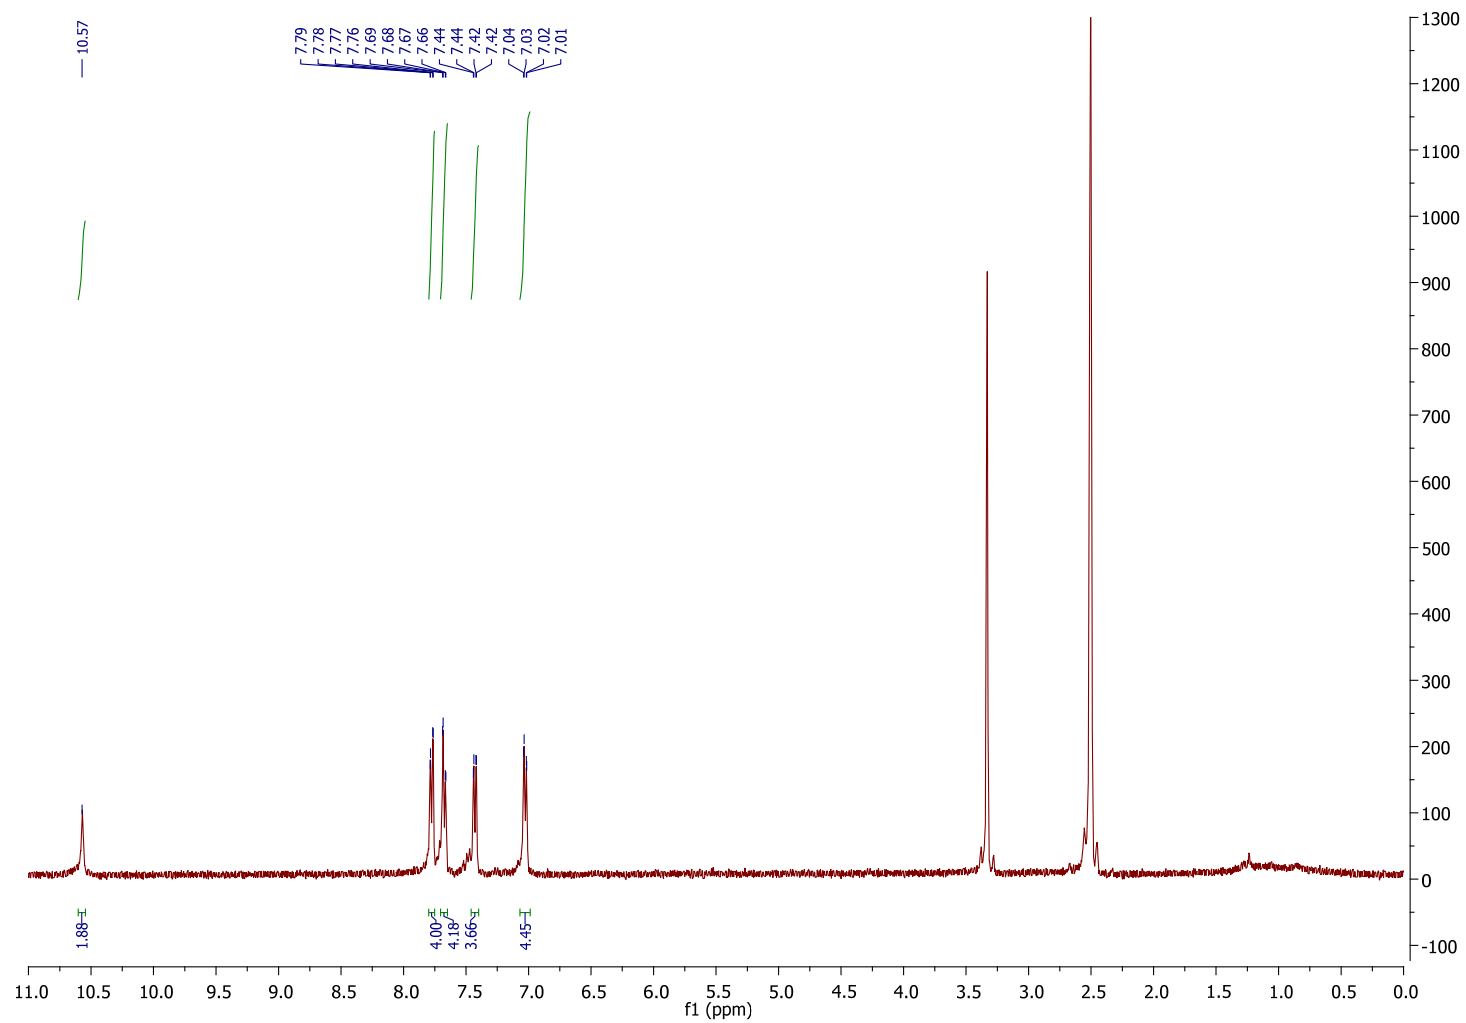

Figure S65.  $^1\text{H-NMR}$  spectrum for compound 33.



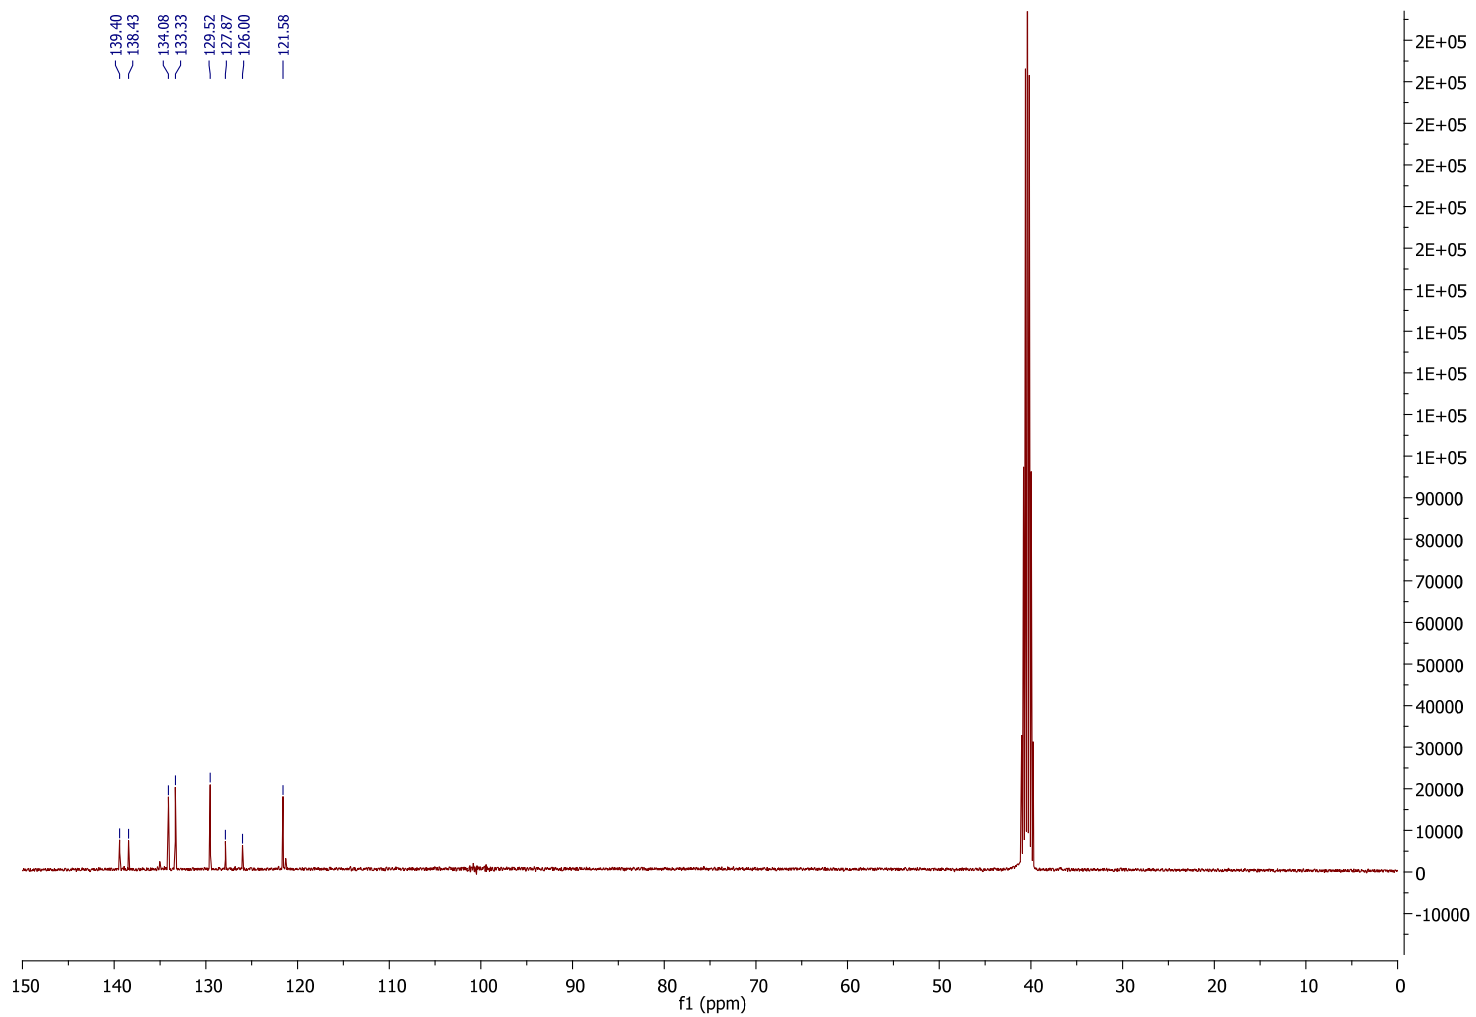

**Figure S66.**  $^{13}\text{C}$ -NMR spectrum for compound **33**.

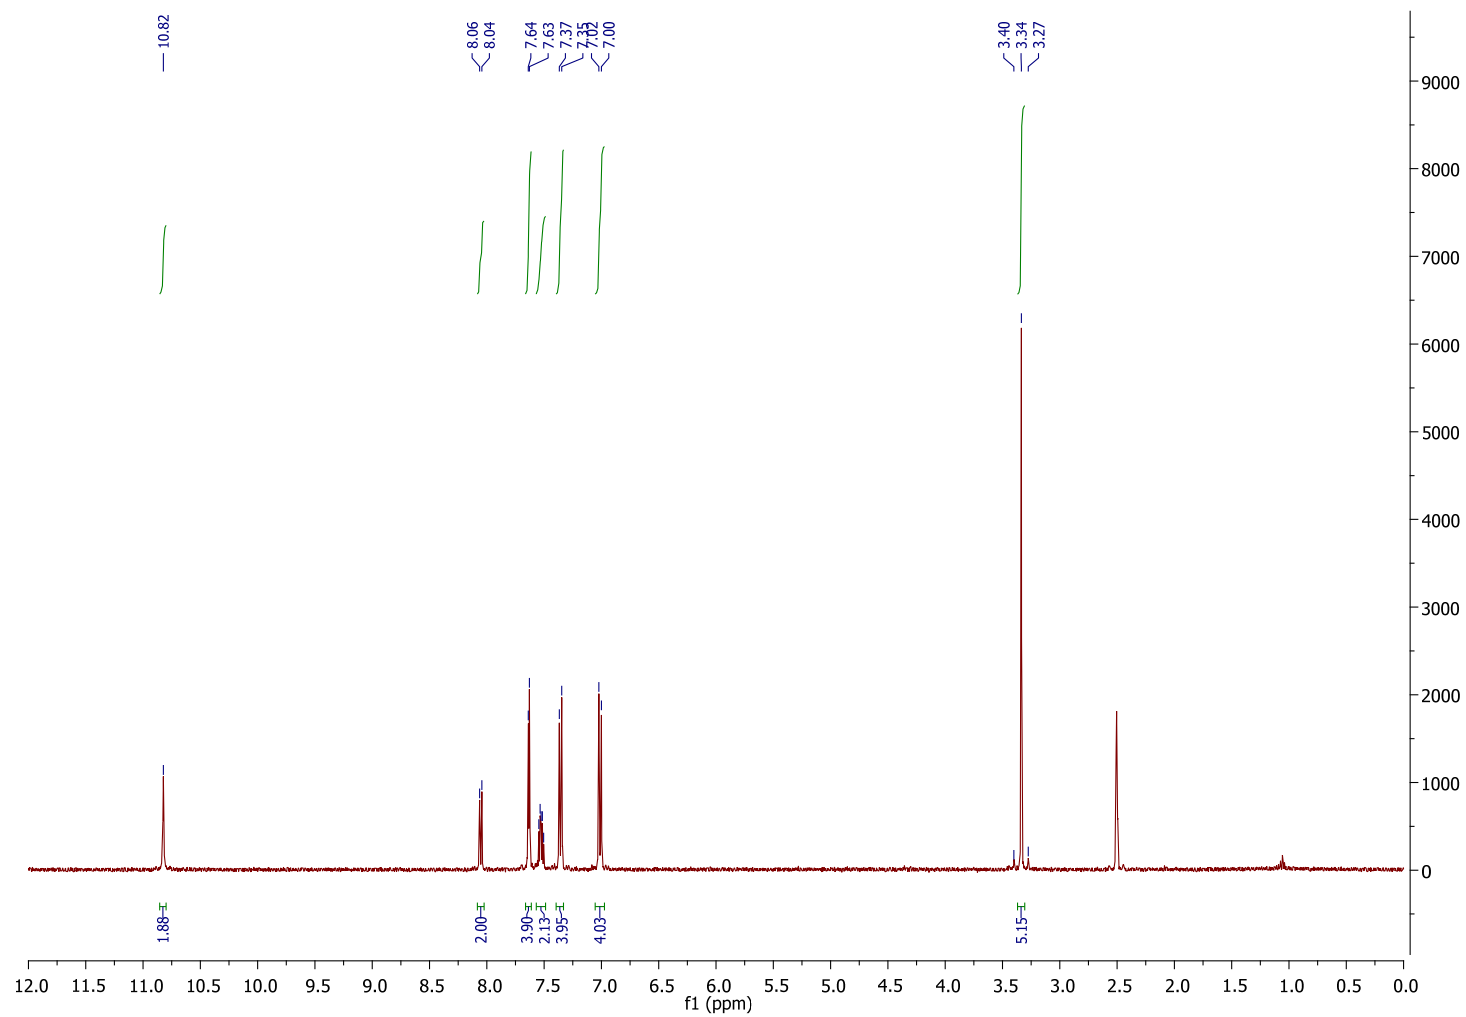

Figure S67. <sup>1</sup>H-NMR spectrum for compound 34.

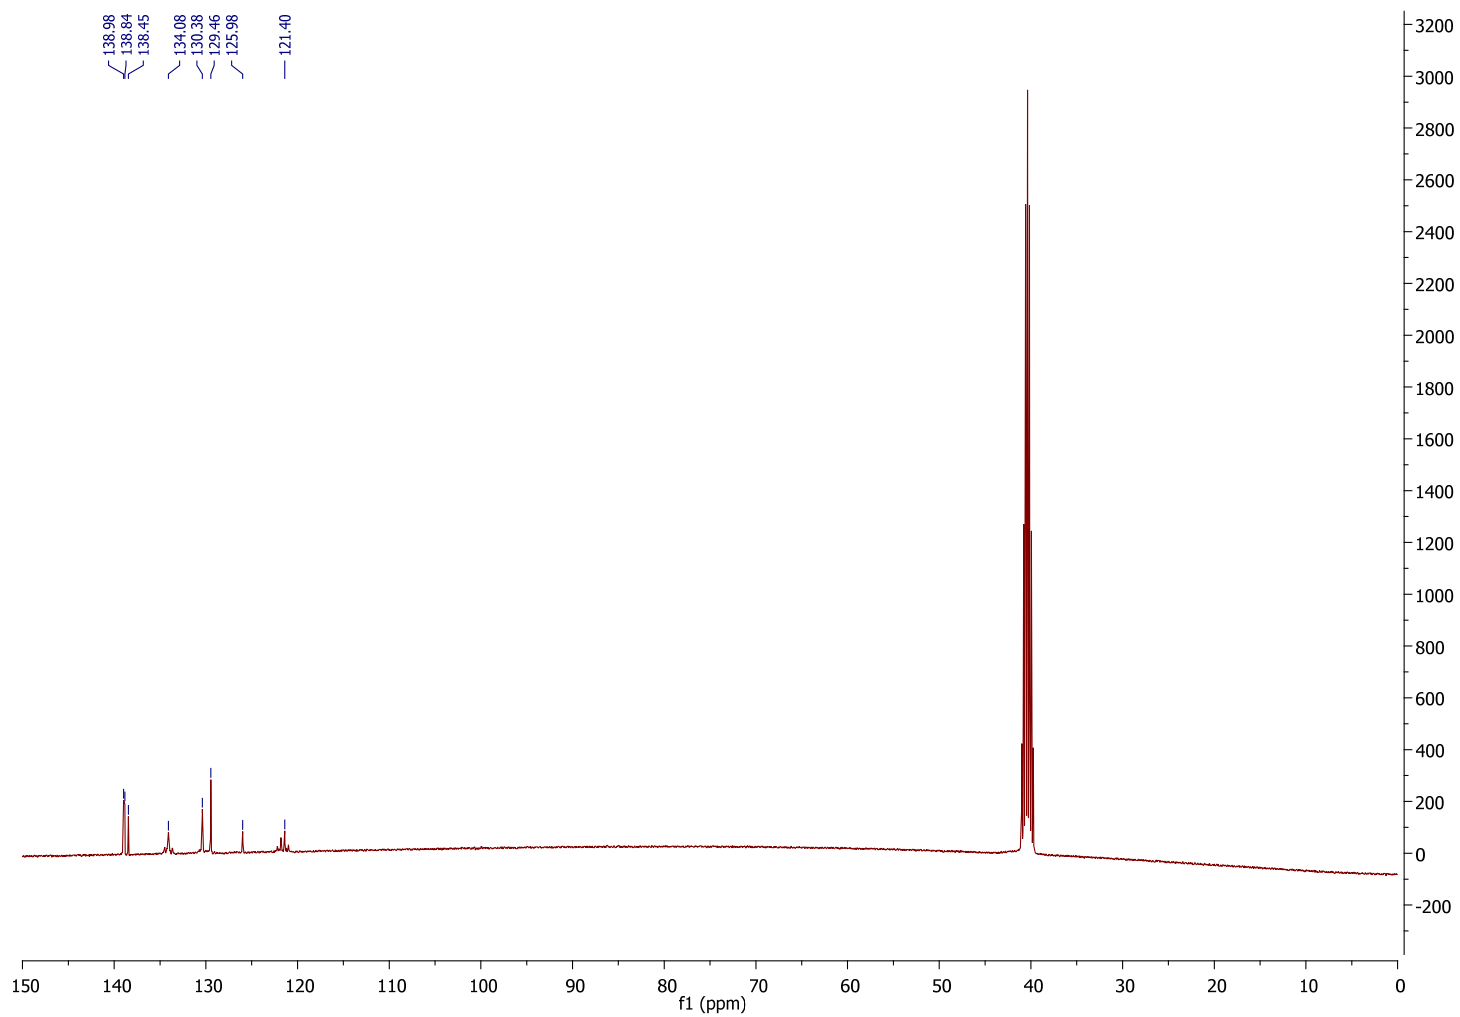

**Figure S68.**  $^{13}\text{C}$ -NMR spectrum for compound **34**.

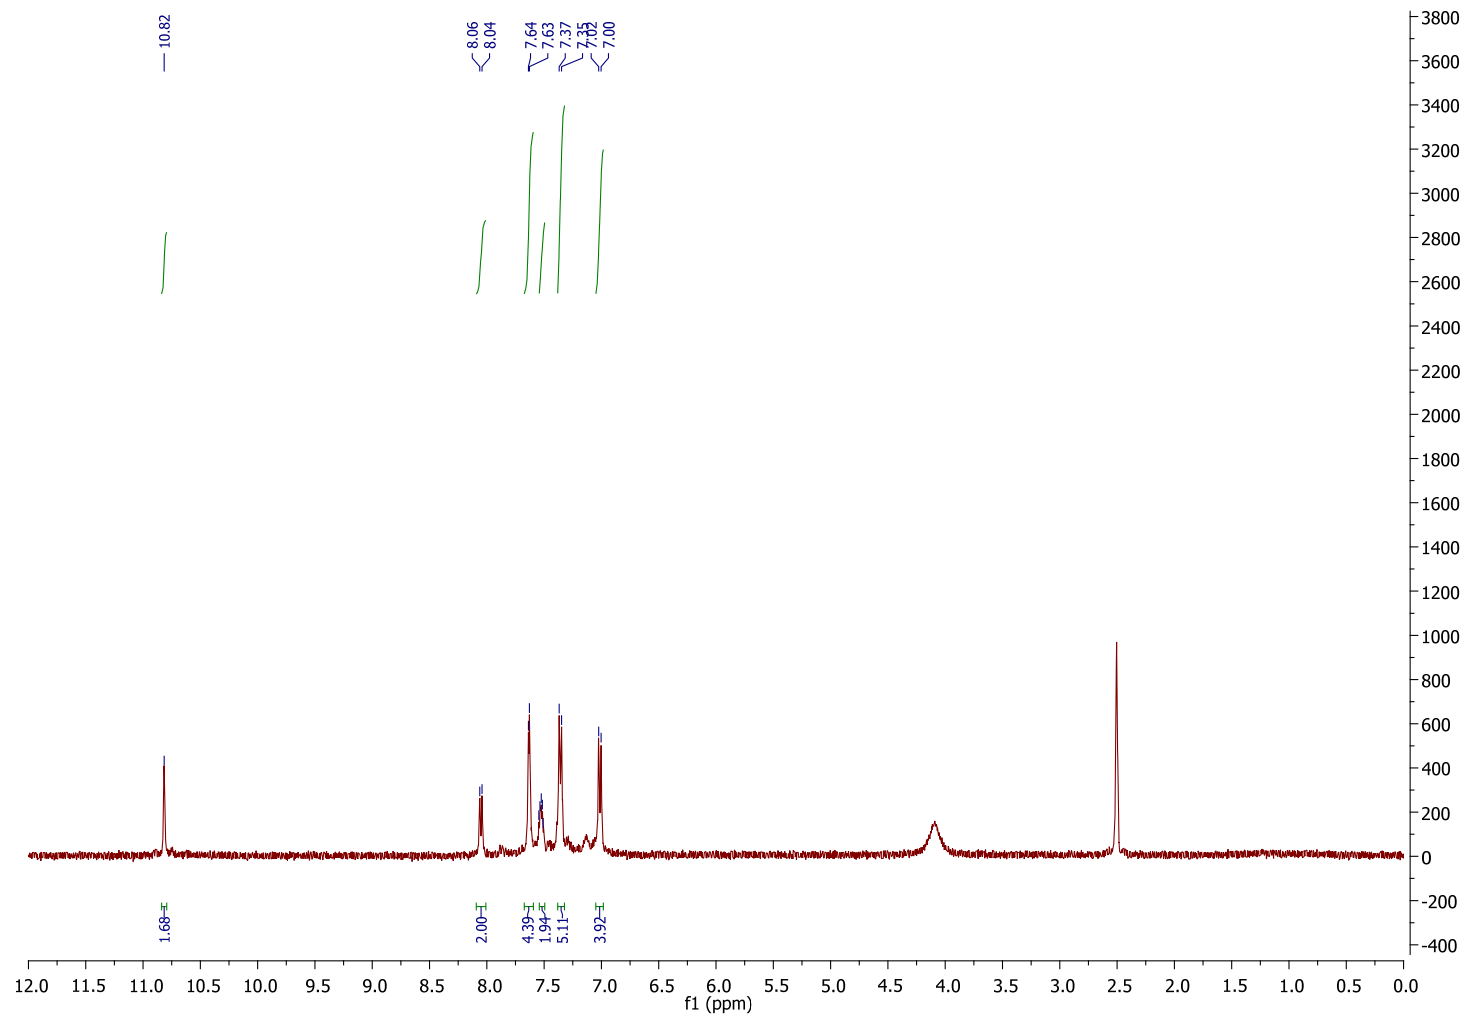

Figure S69. <sup>1</sup>H-NMR spectrum for compound 35.

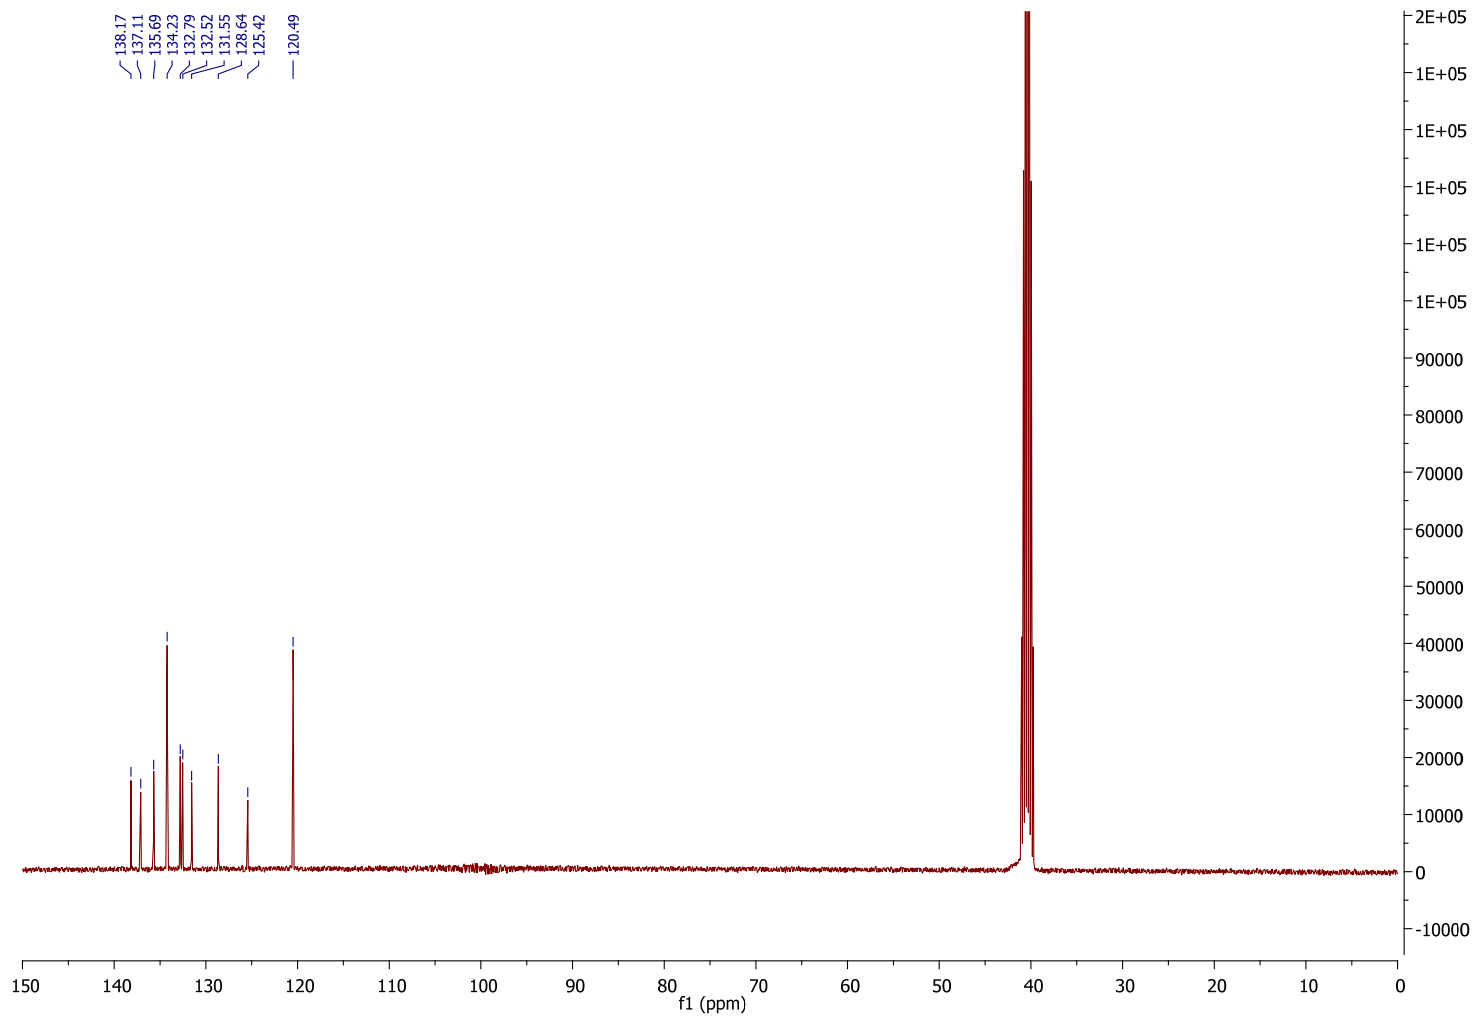

Figure S70.  $^{13}\text{C}$ -NMR spectrum for compound 35.

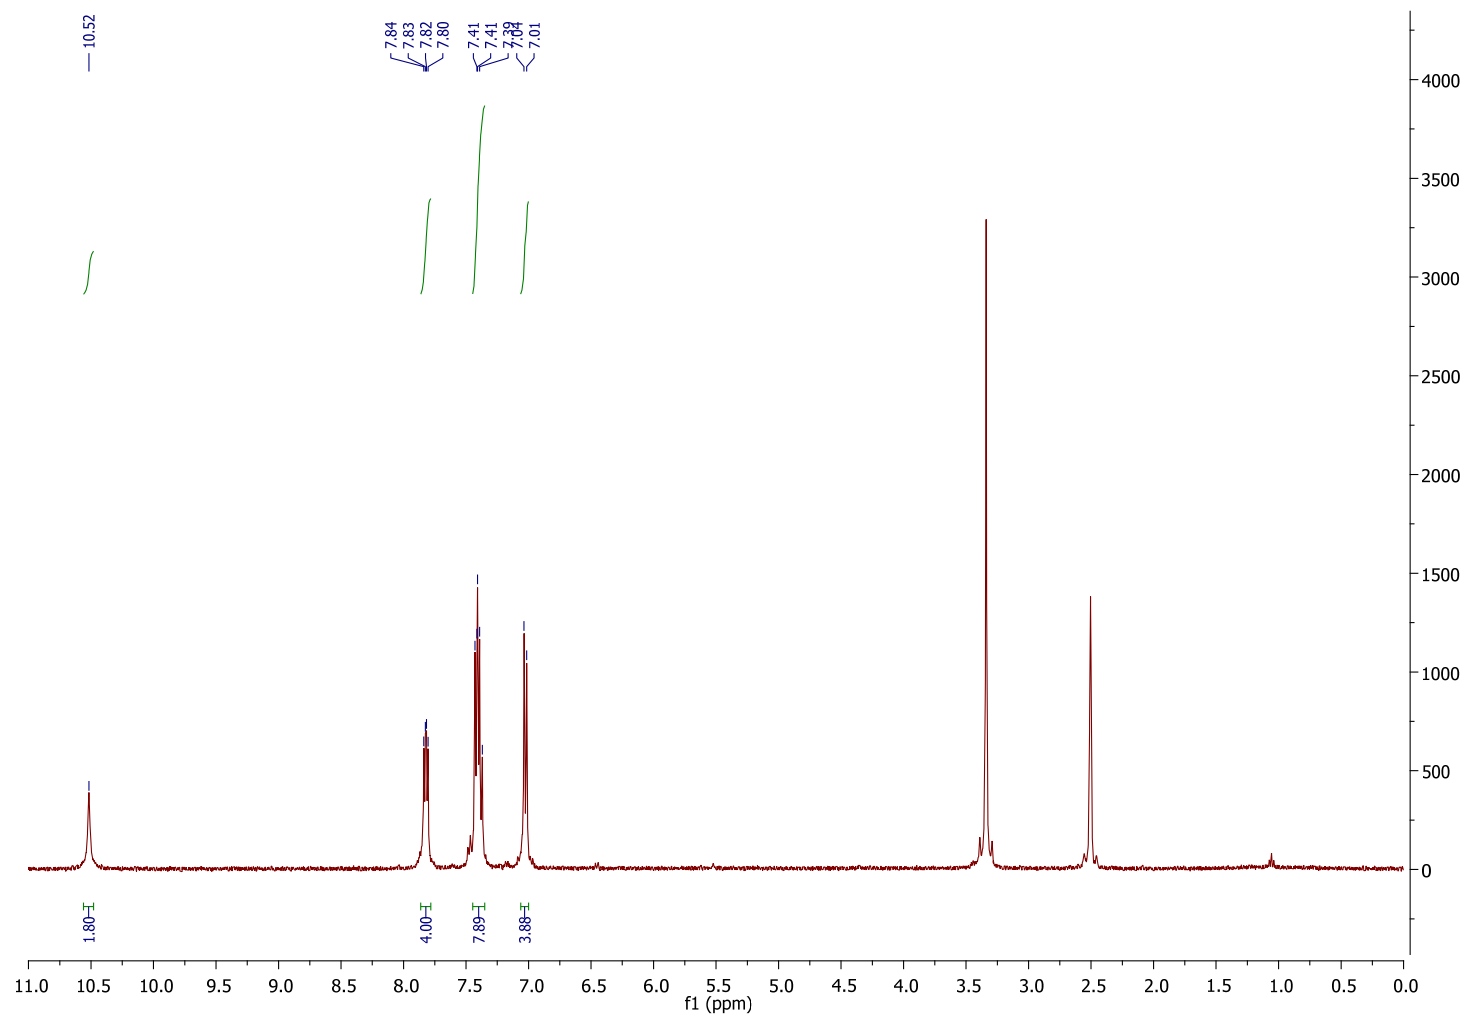

Figure S71. <sup>1</sup>H-NMR spectrum for compound 36.

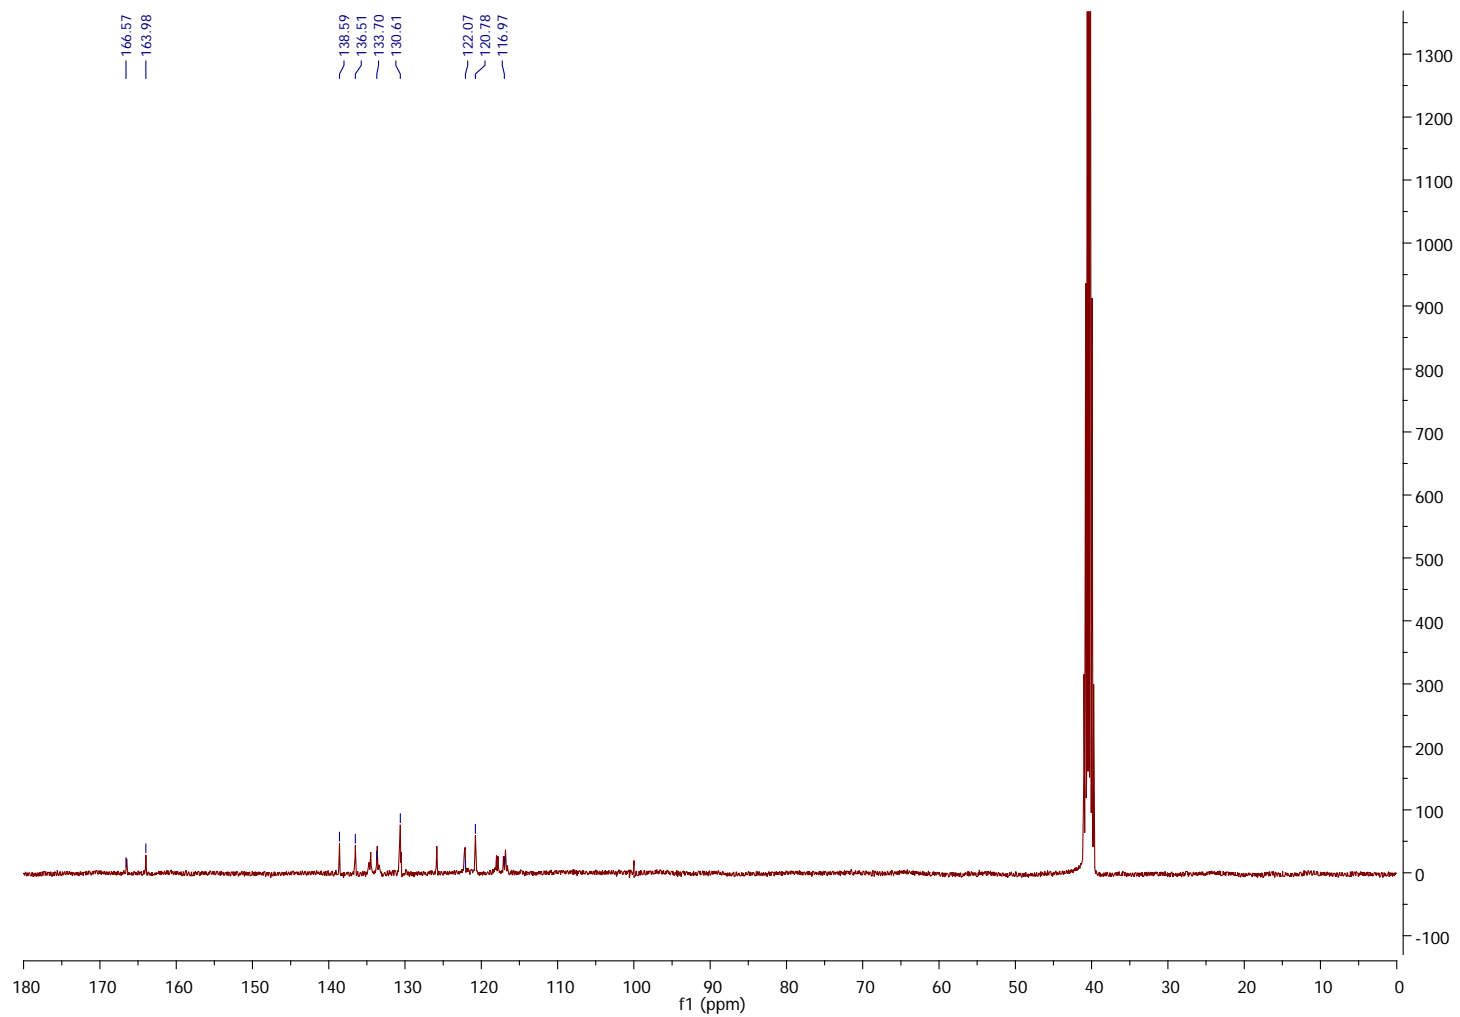

**Figure S72.**  $^{13}\text{C}$ -NMR spectrum for compound **36**.

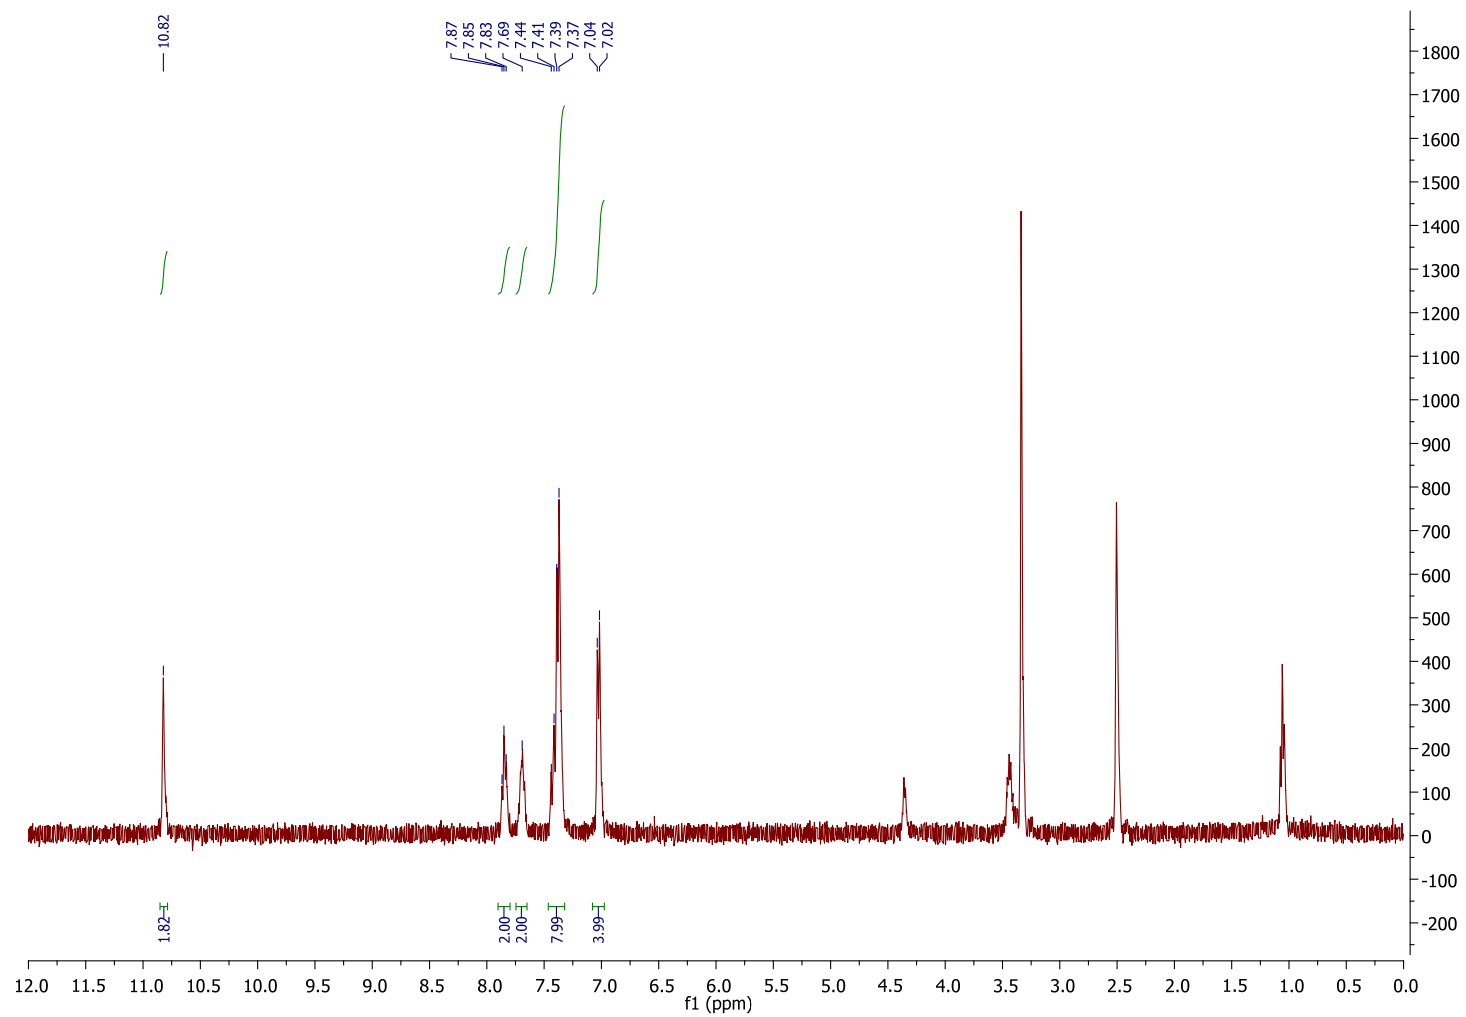

Figure S73. <sup>1</sup>H-NMR spectrum for compound 37.



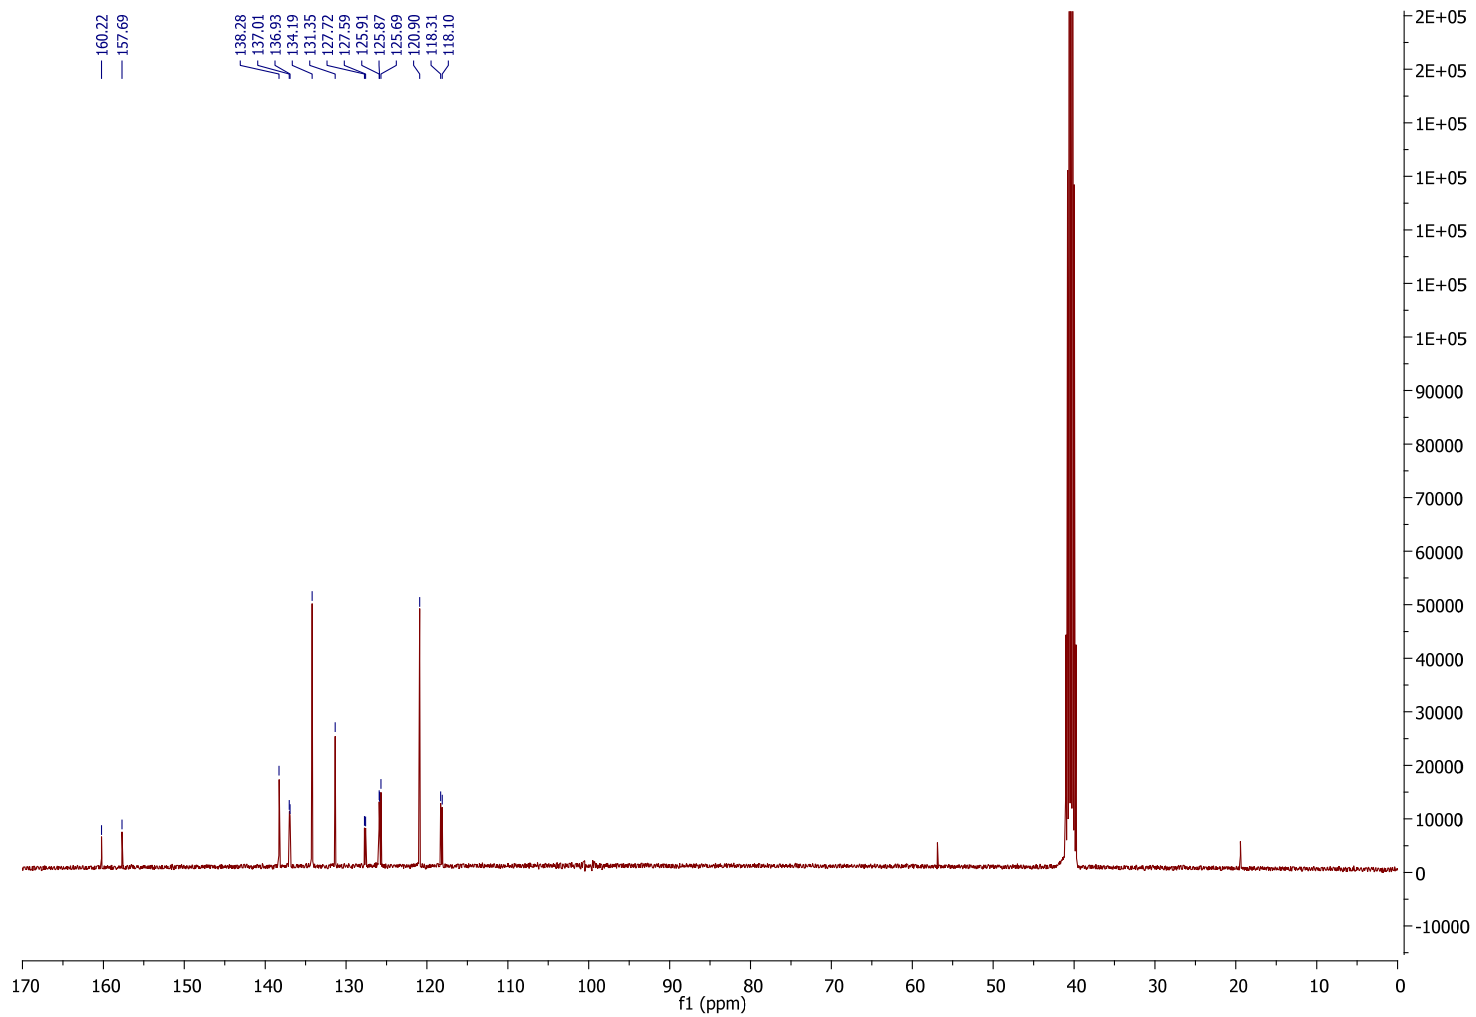

Figure S74.  $^{13}\text{C}$ -NMR spectrum for compound 37.

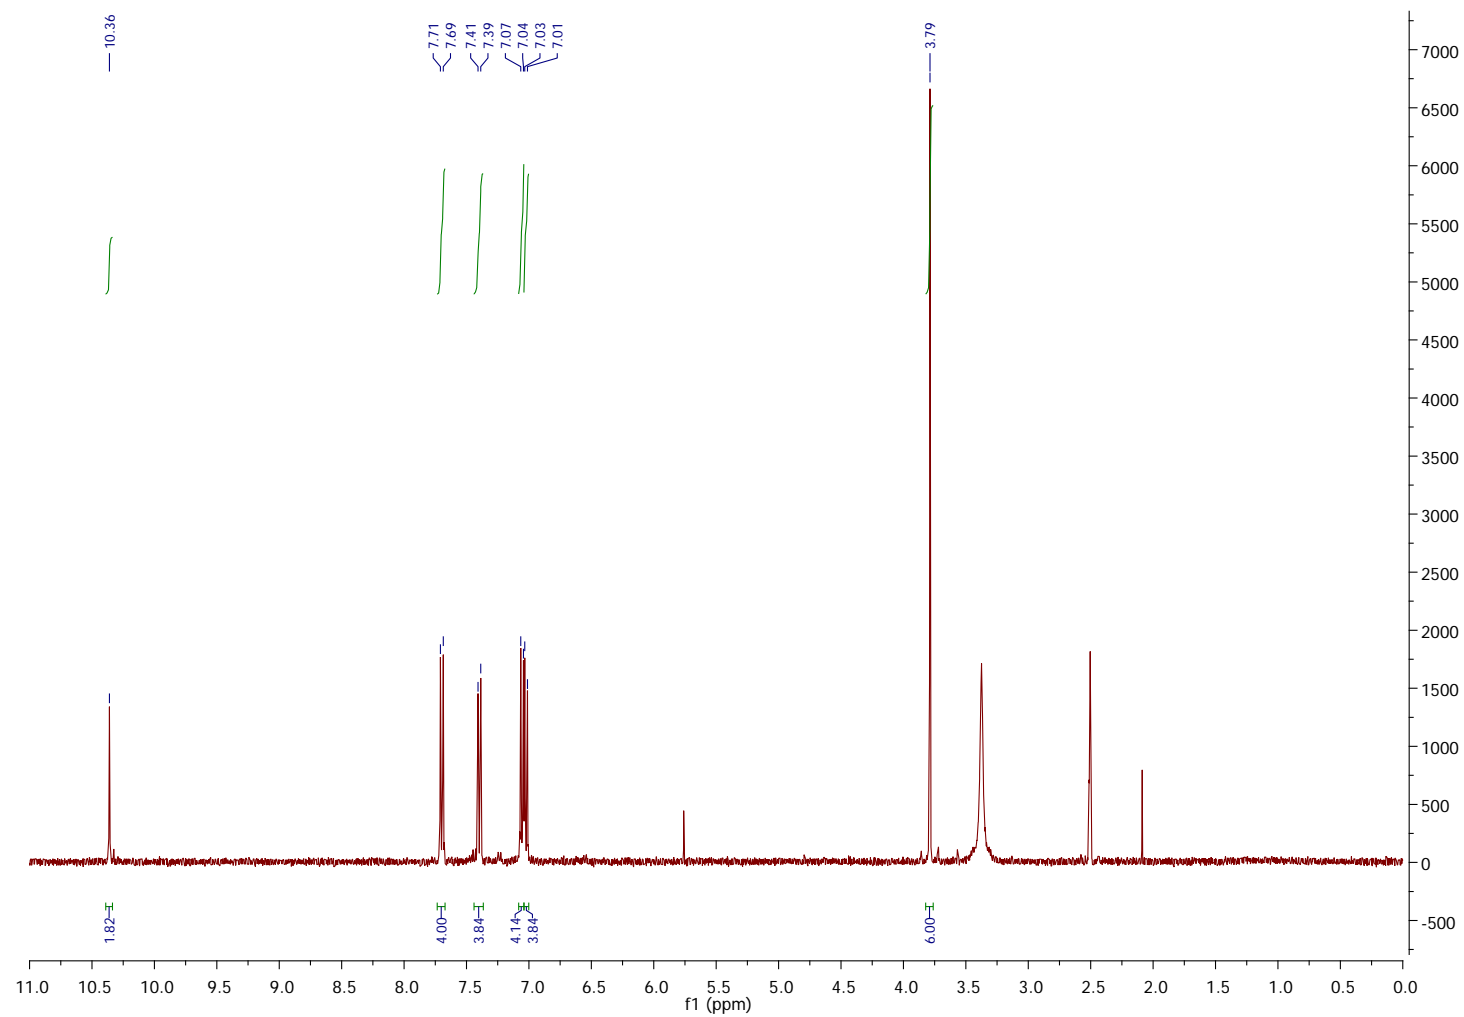

Figure S75. <sup>1</sup>H-NMR spectrum for compound 38.

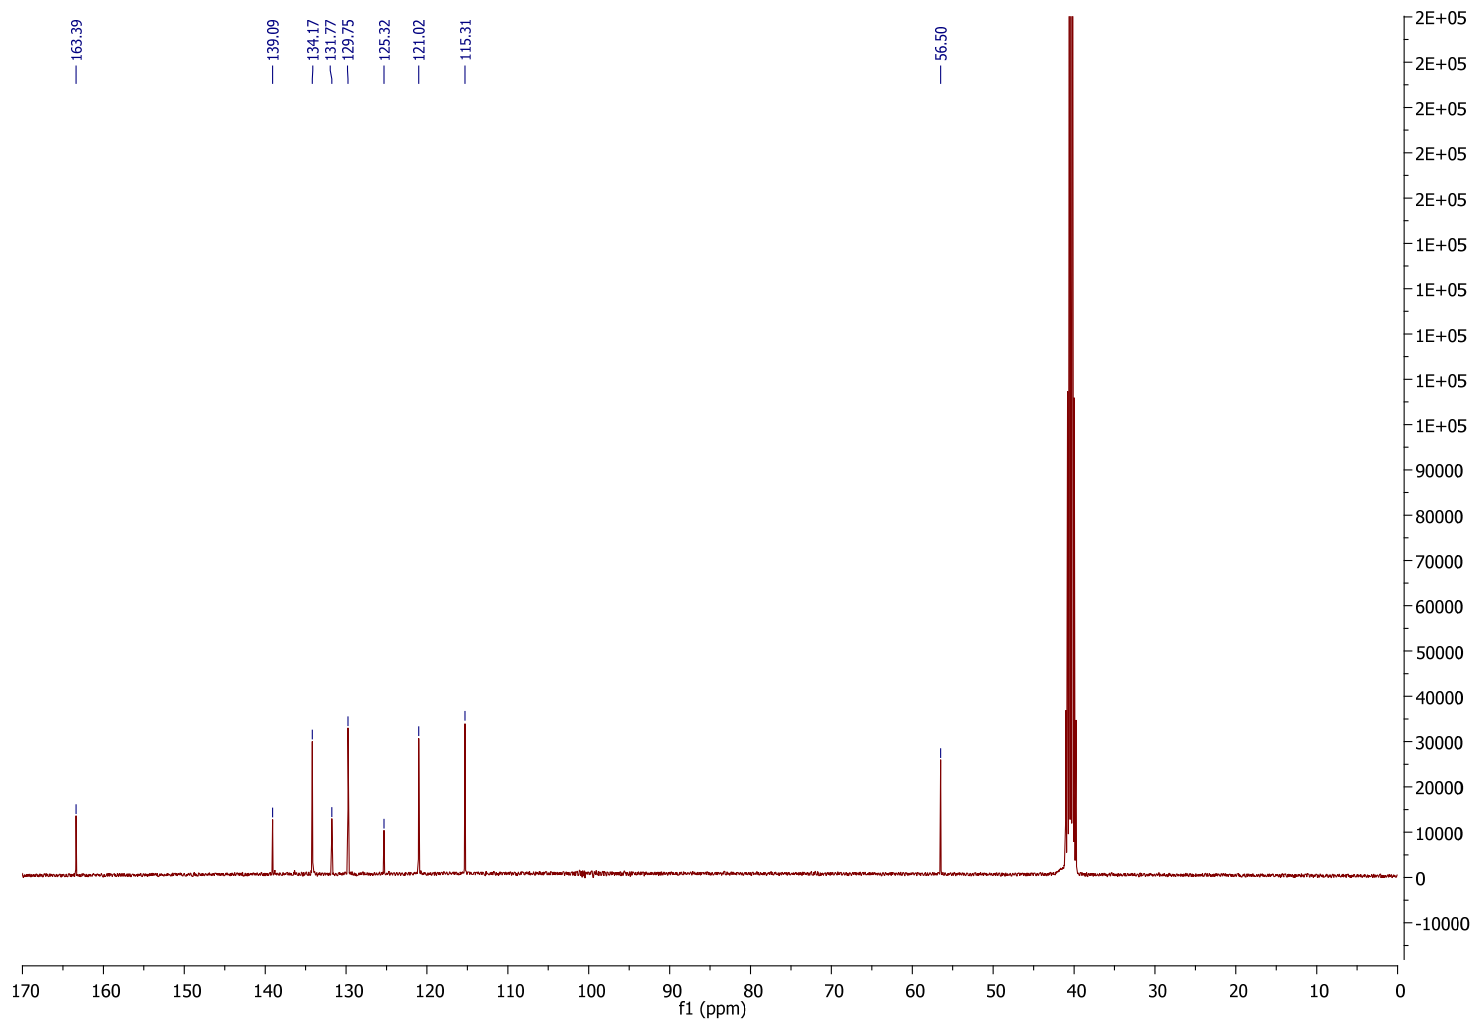

**Figure S76.**  $^{13}\text{C}$ -NMR spectrum for compound **38**.

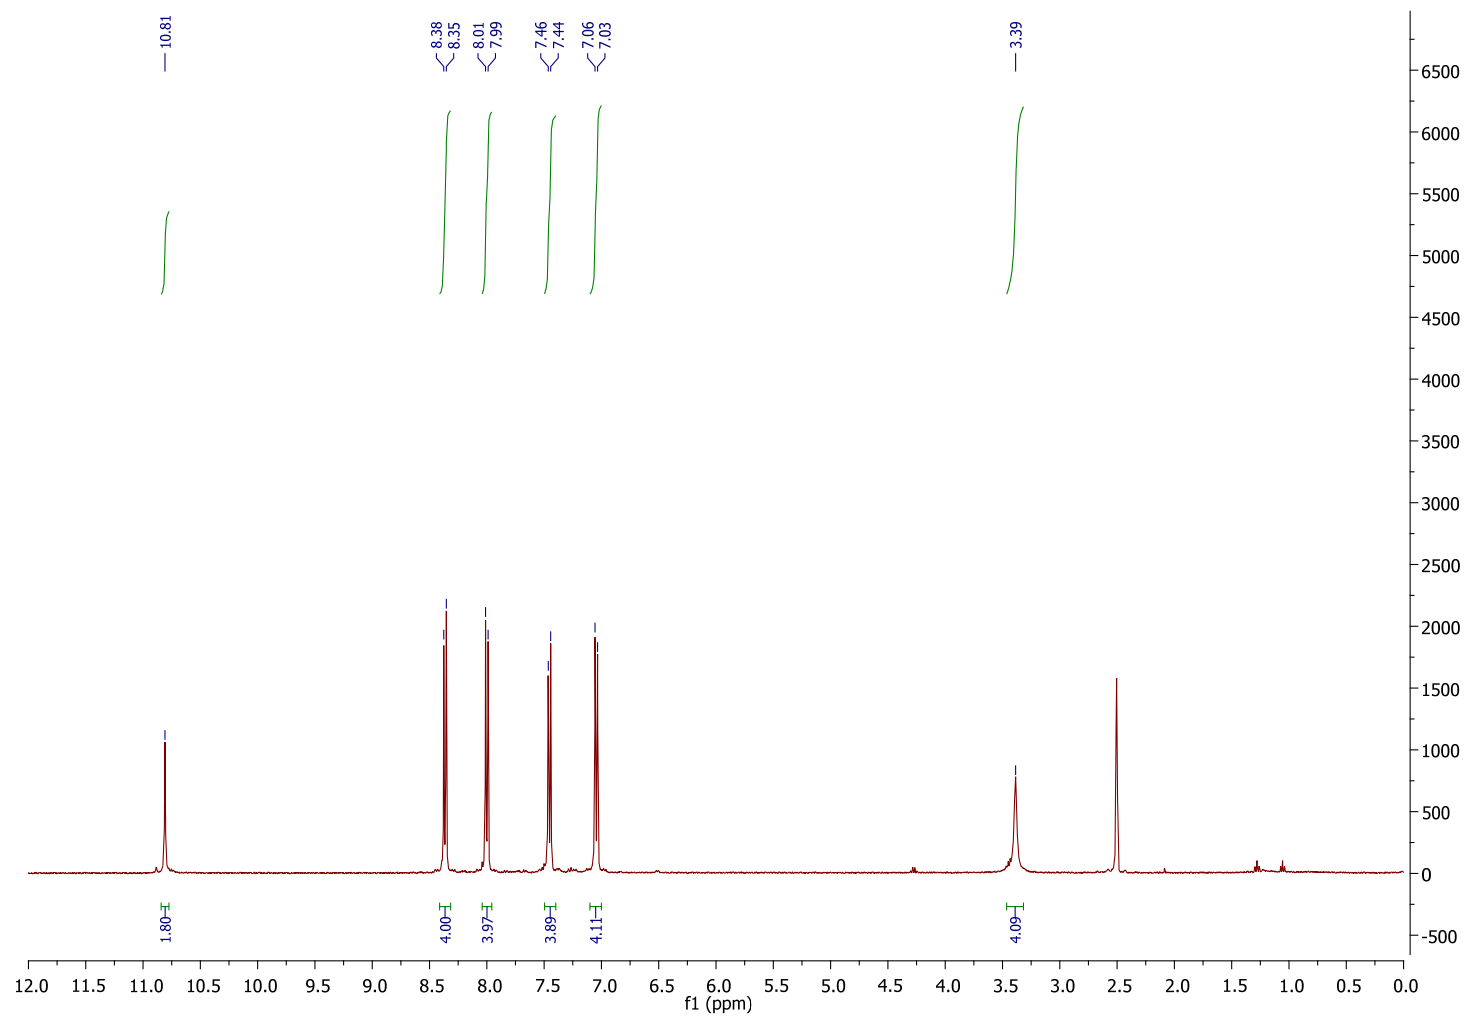

Figure S77. <sup>1</sup>H-NMR spectrum for compound 39.

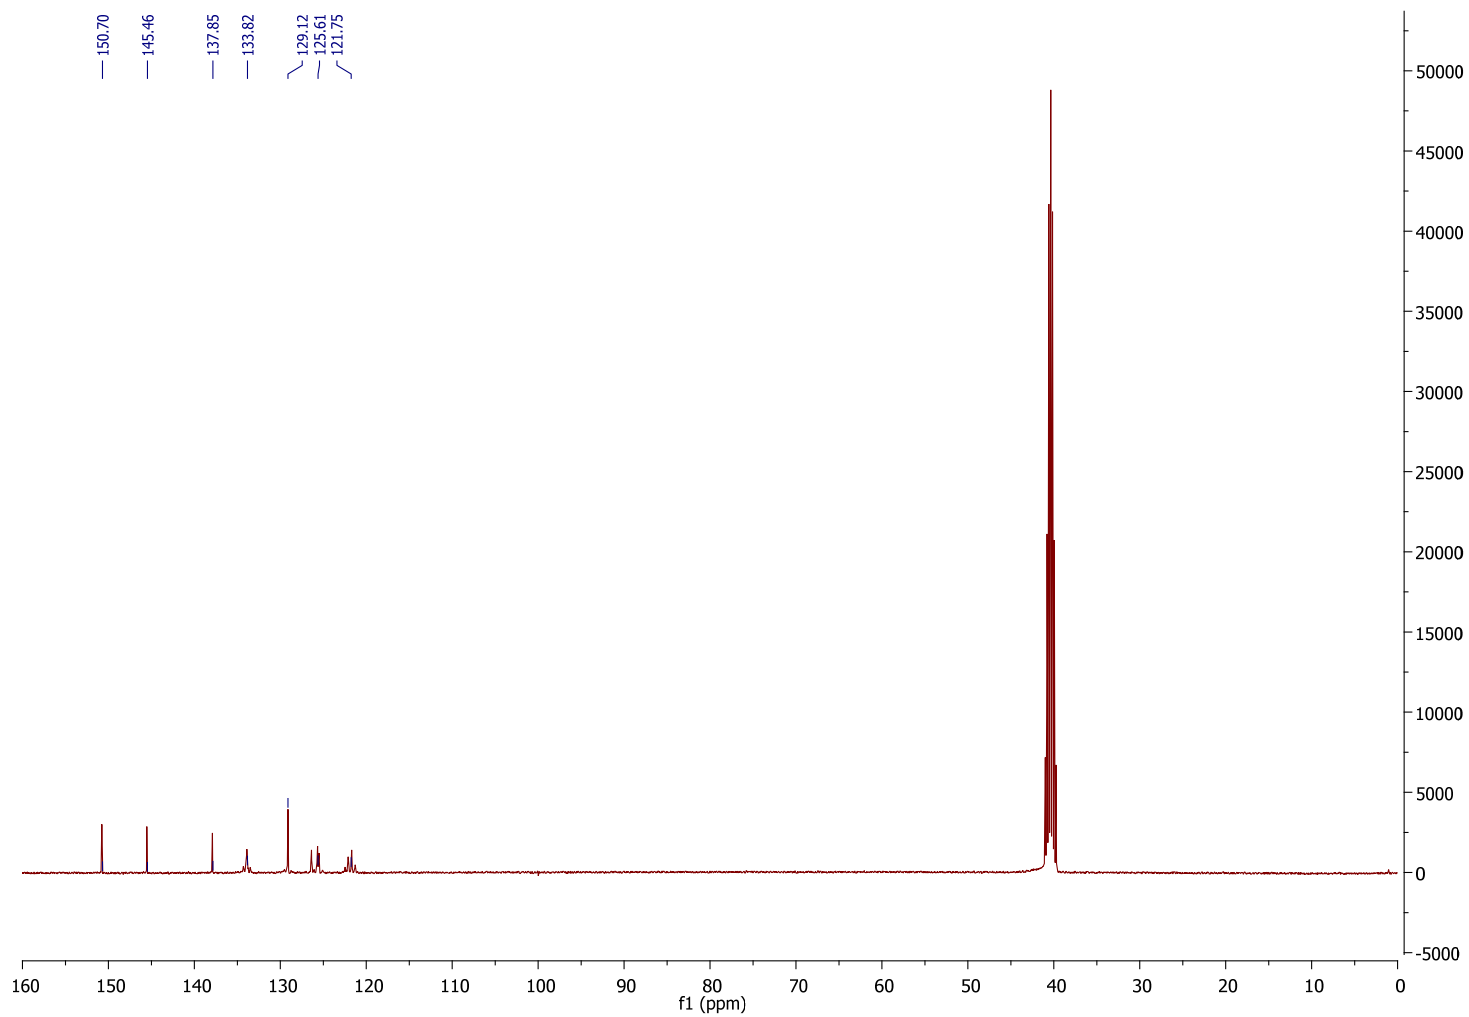

**Figure S78.**  $^{13}\text{C}$ -NMR spectrum for compound **39**.

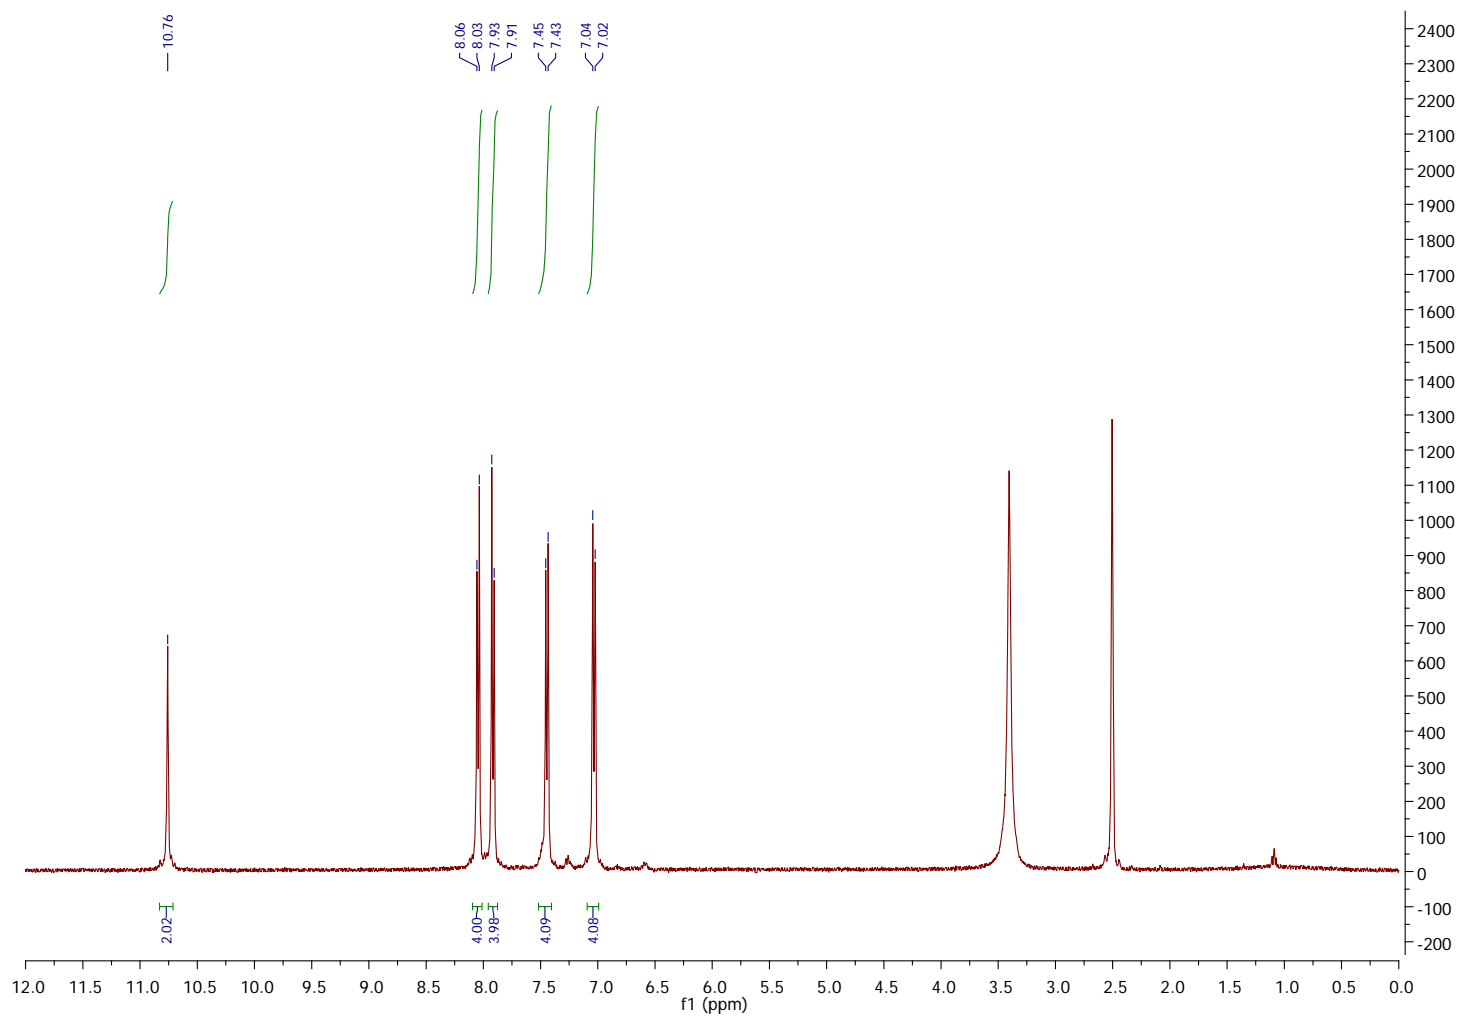

Figure S79. <sup>1</sup>H-NMR spectrum for compound 40.

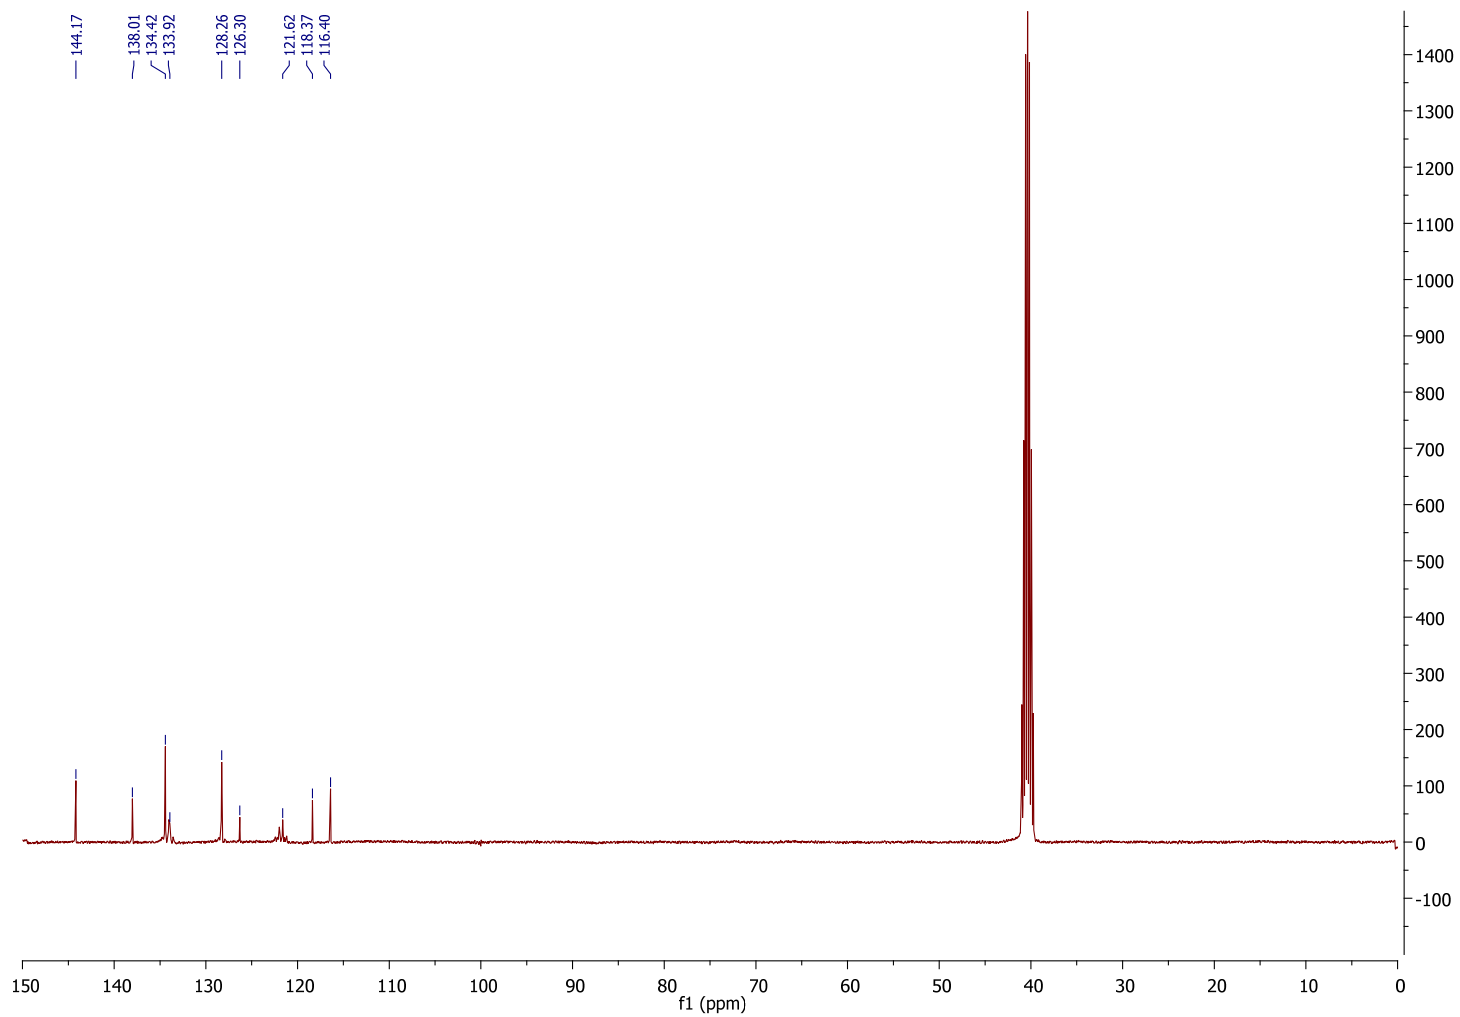

**Figure S80.**  $^{13}\text{C}$ -NMR spectrum for compound **40**.

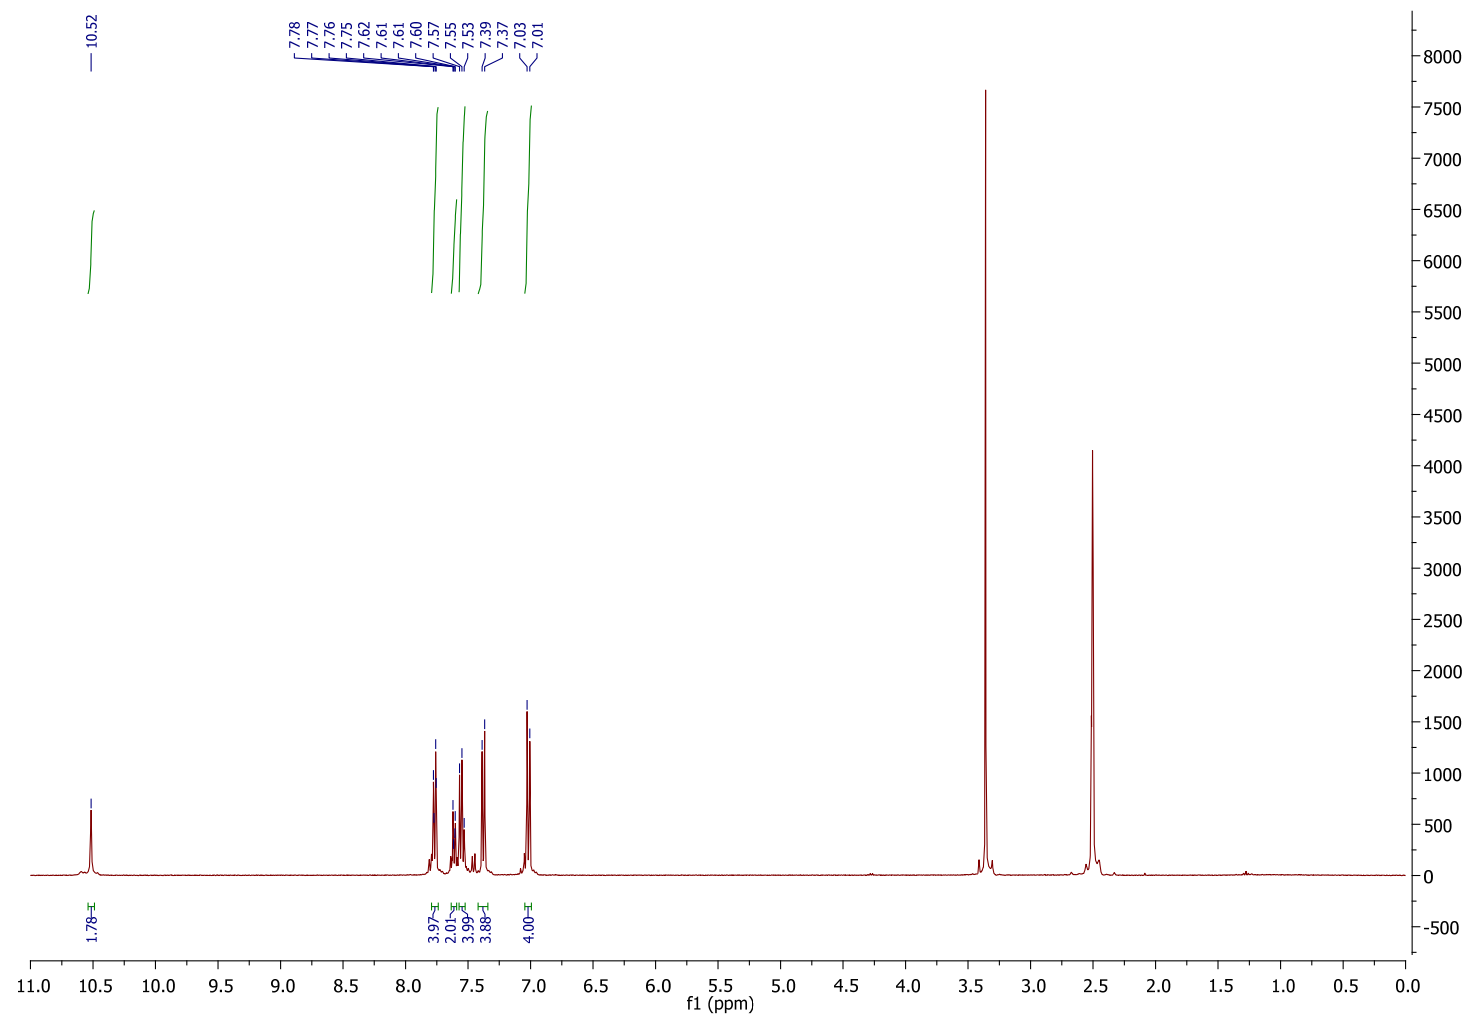

**Figure S81.** <sup>1</sup>H-NMR spectrum for compound **41**.



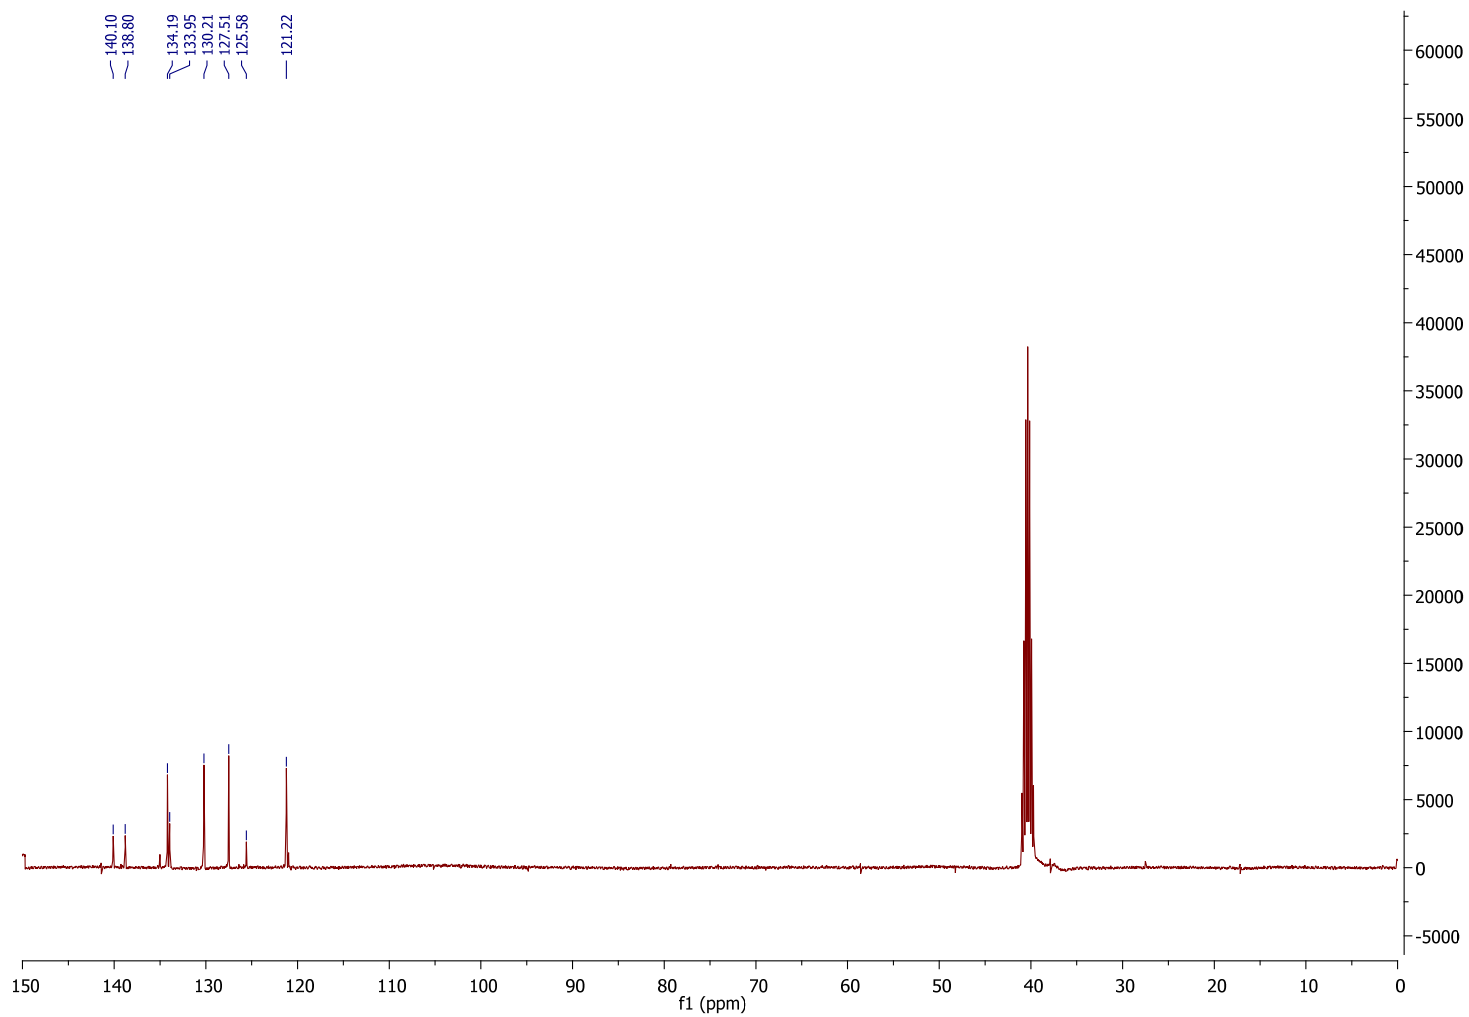

**Figure S82.**  $^{13}\text{C}$ -NMR spectrum for compound **41**.

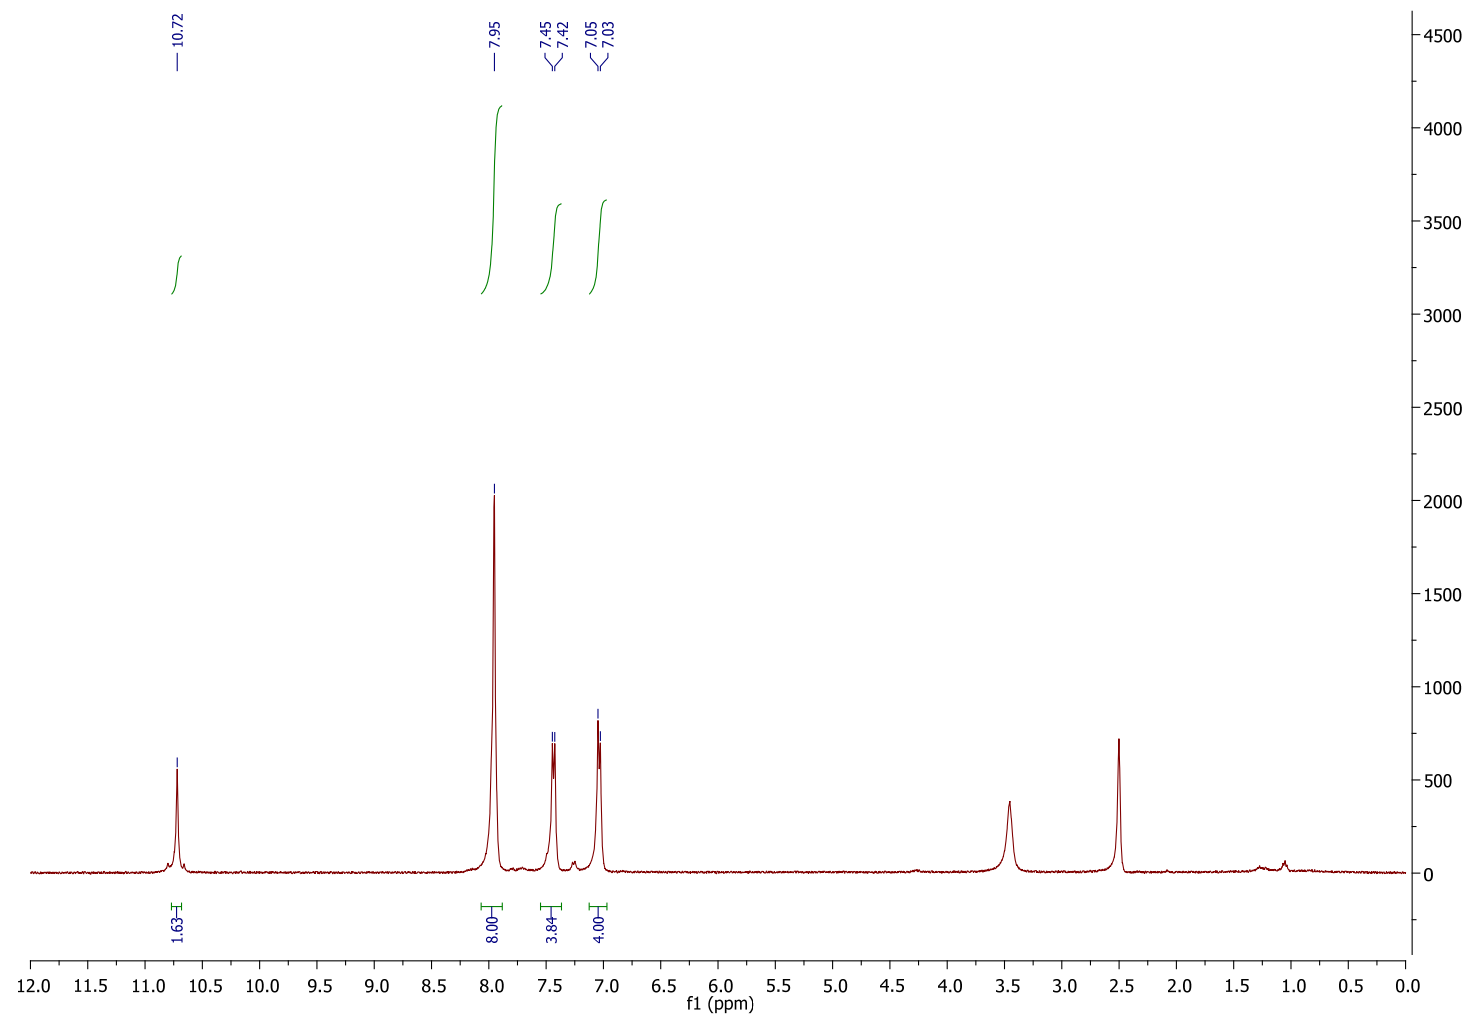

**Figure S83.** <sup>1</sup>H-NMR spectrum for compound **42**.

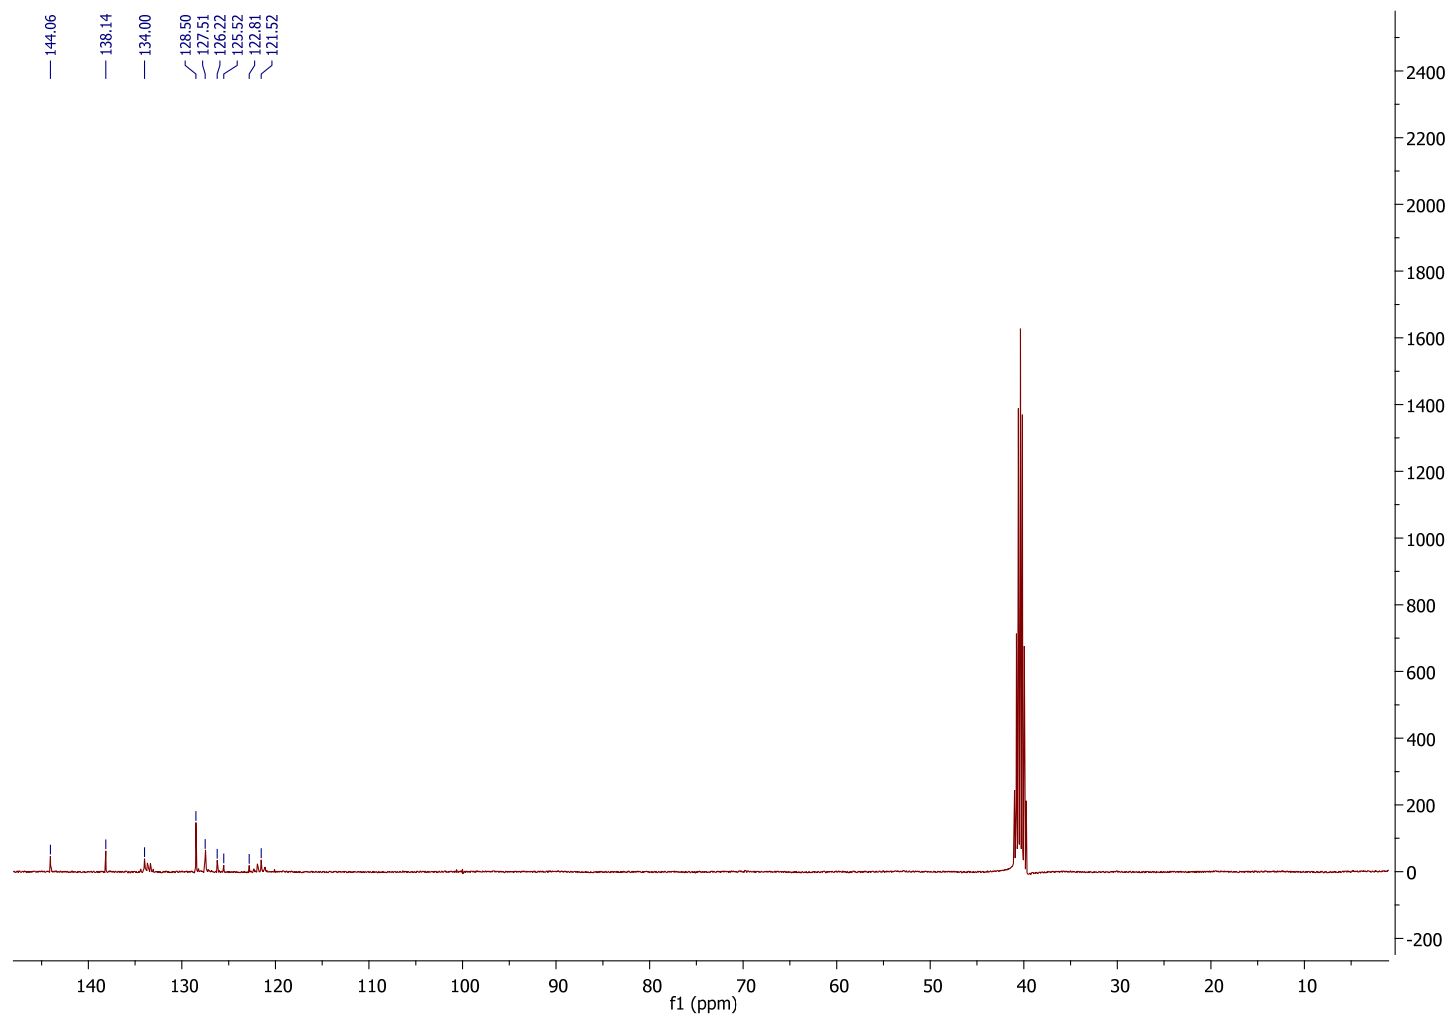

**Figure S84.**  $^{13}\text{C}$ -NMR spectrum for compound **42**.

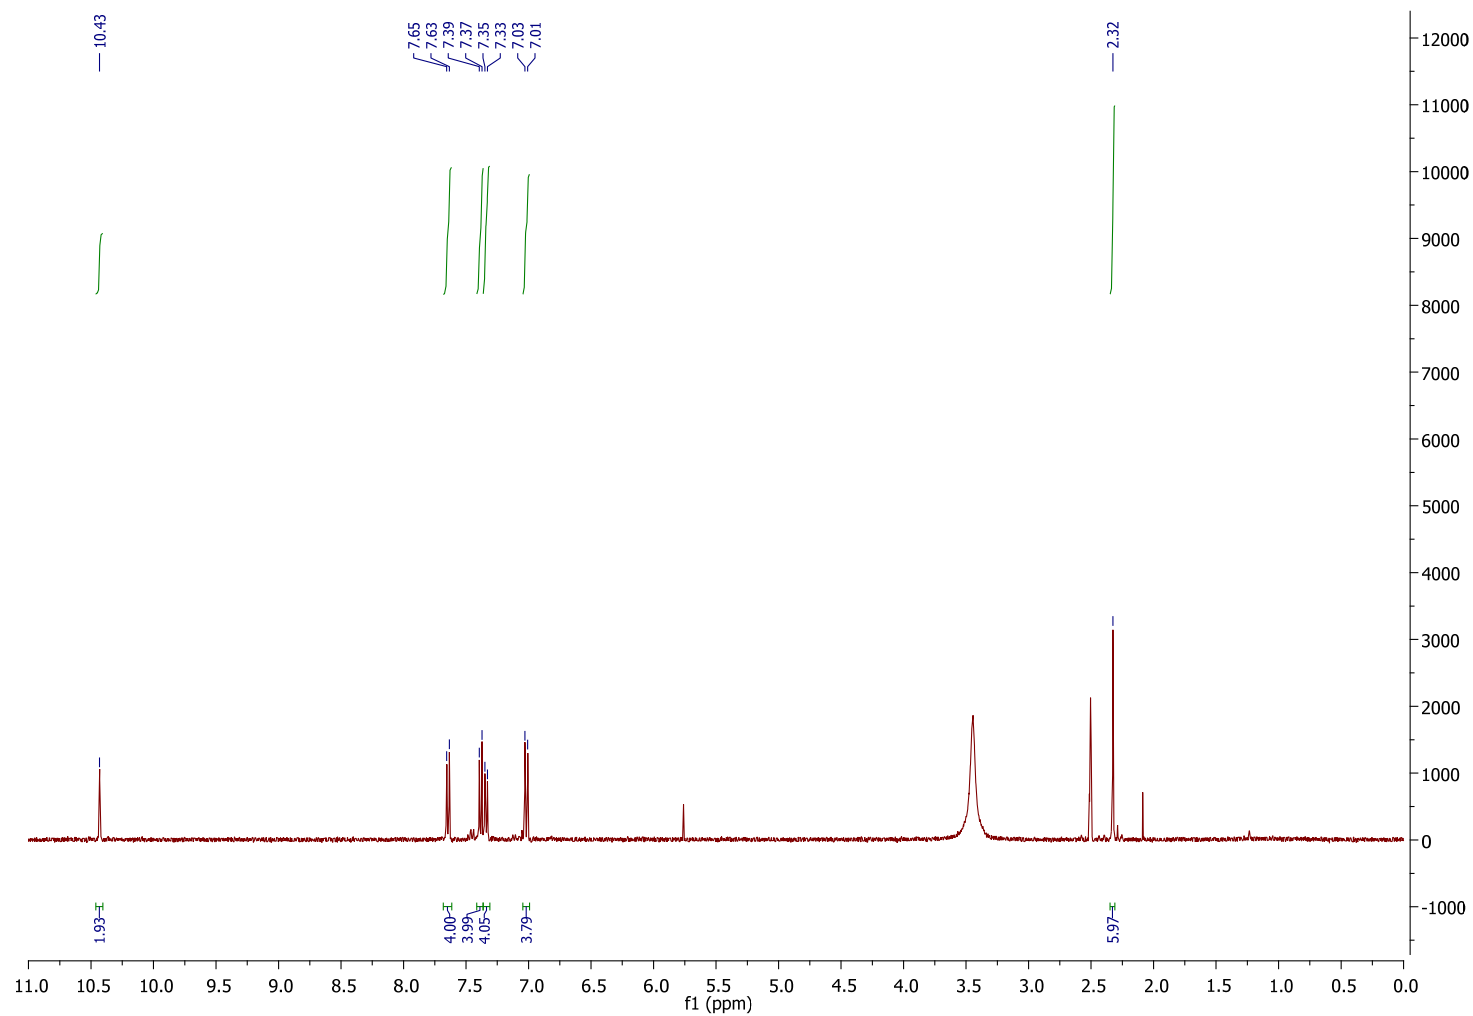

Figure S85. <sup>1</sup>H-NMR spectrum for compound 43.

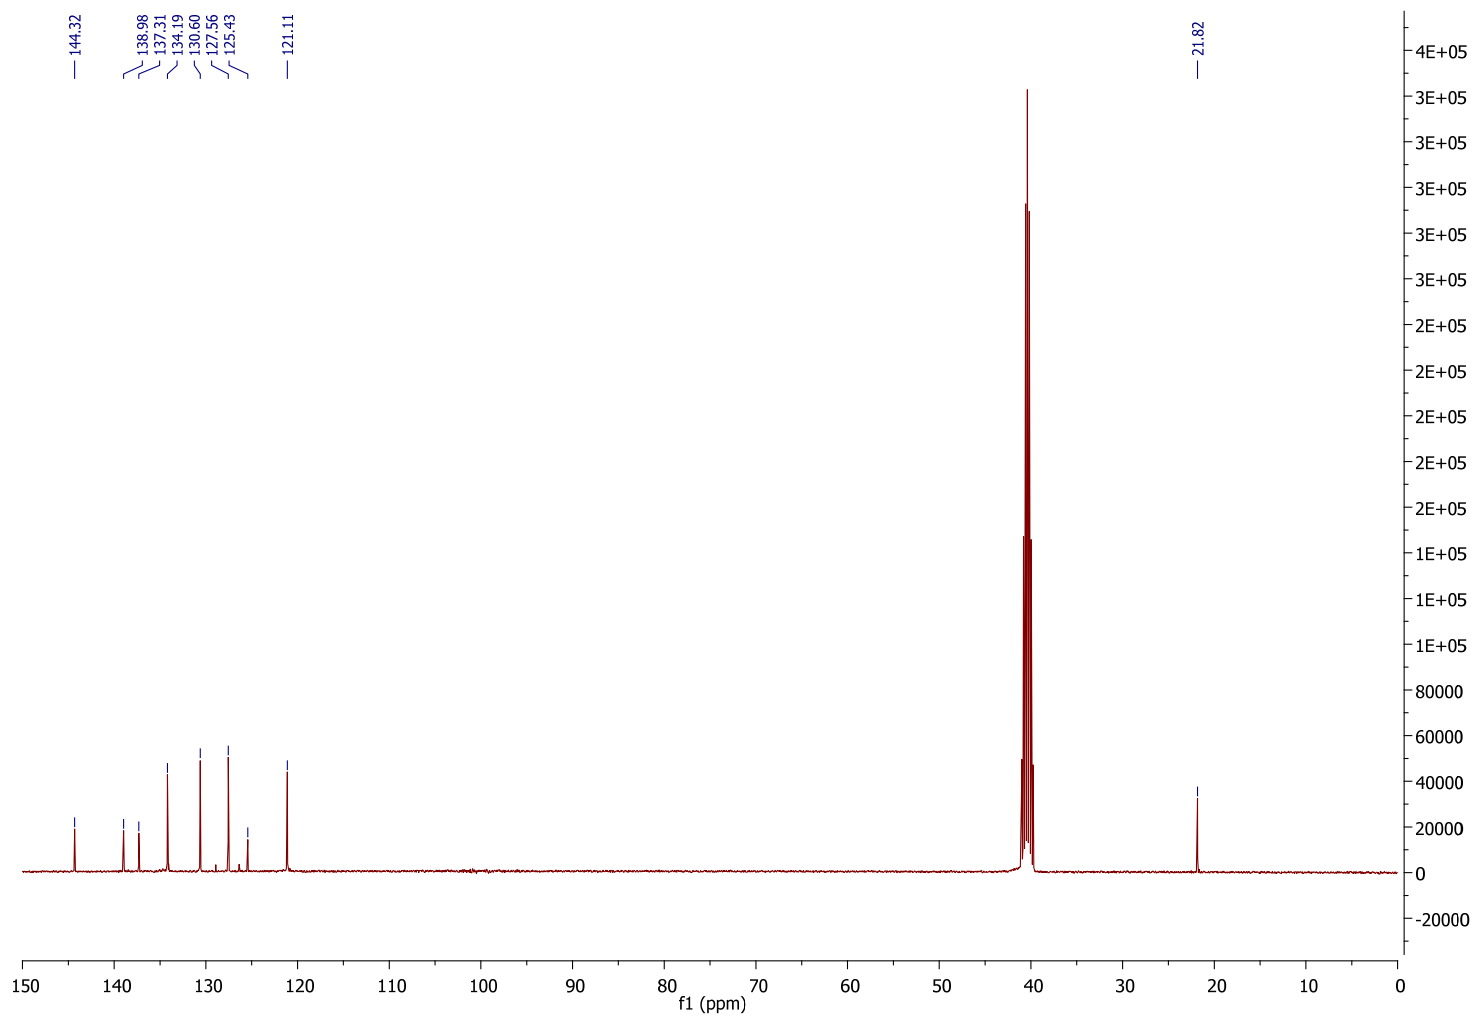

Figure S86. <sup>13</sup>C-NMR spectrum for compound 43.

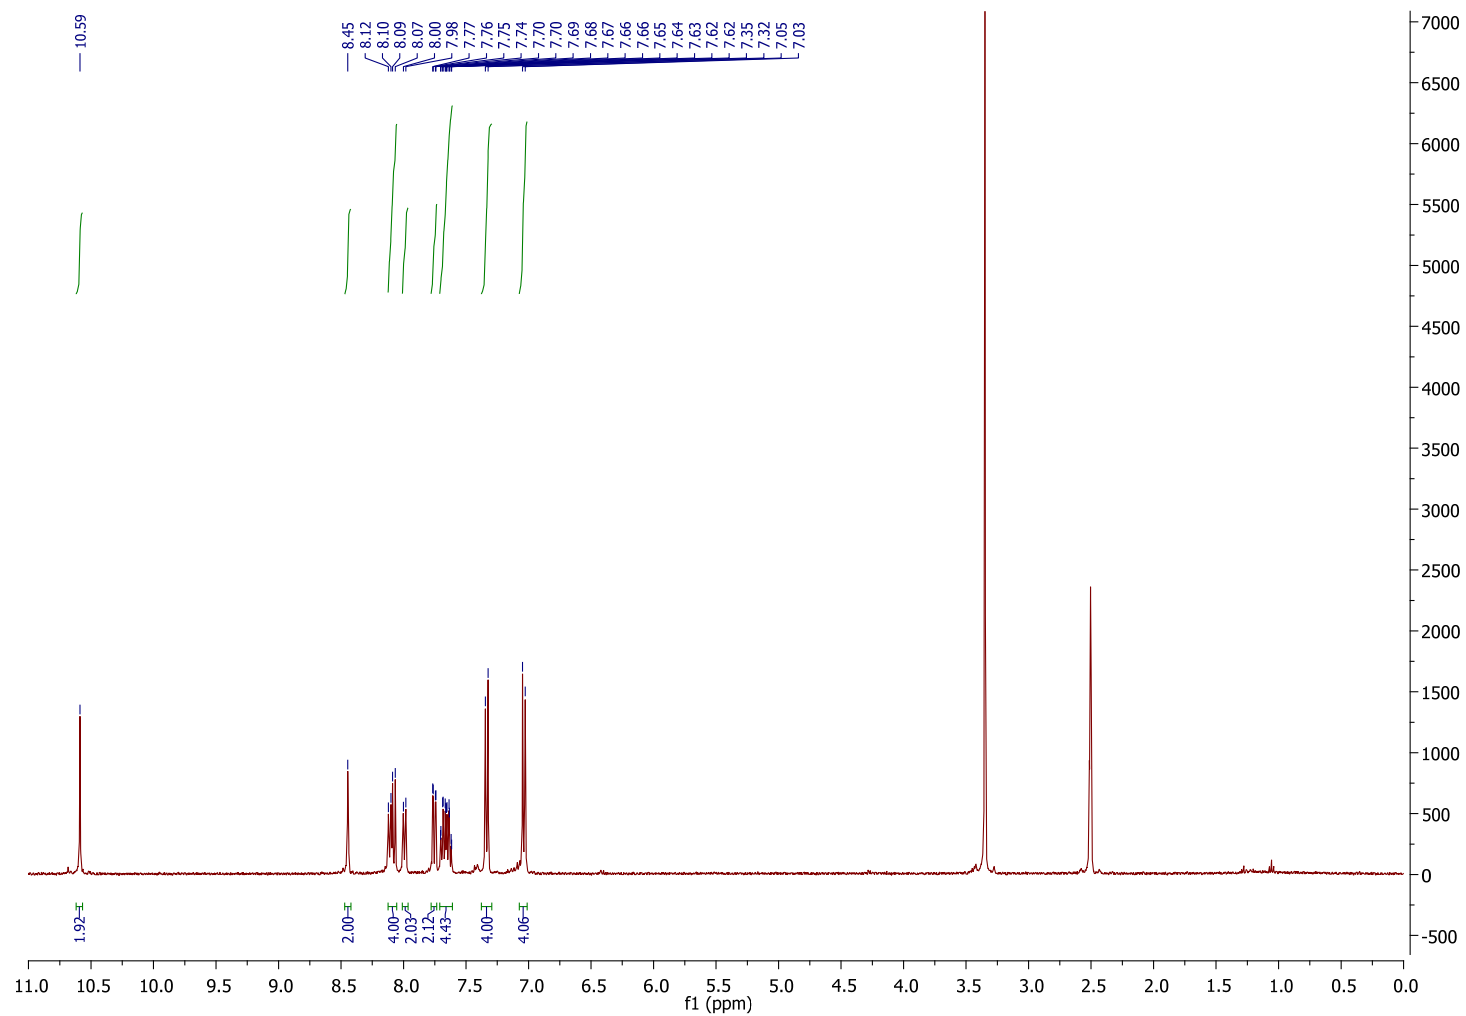

**Figure S87.**  $^1\text{H-NMR}$  spectrum for compound **44**.

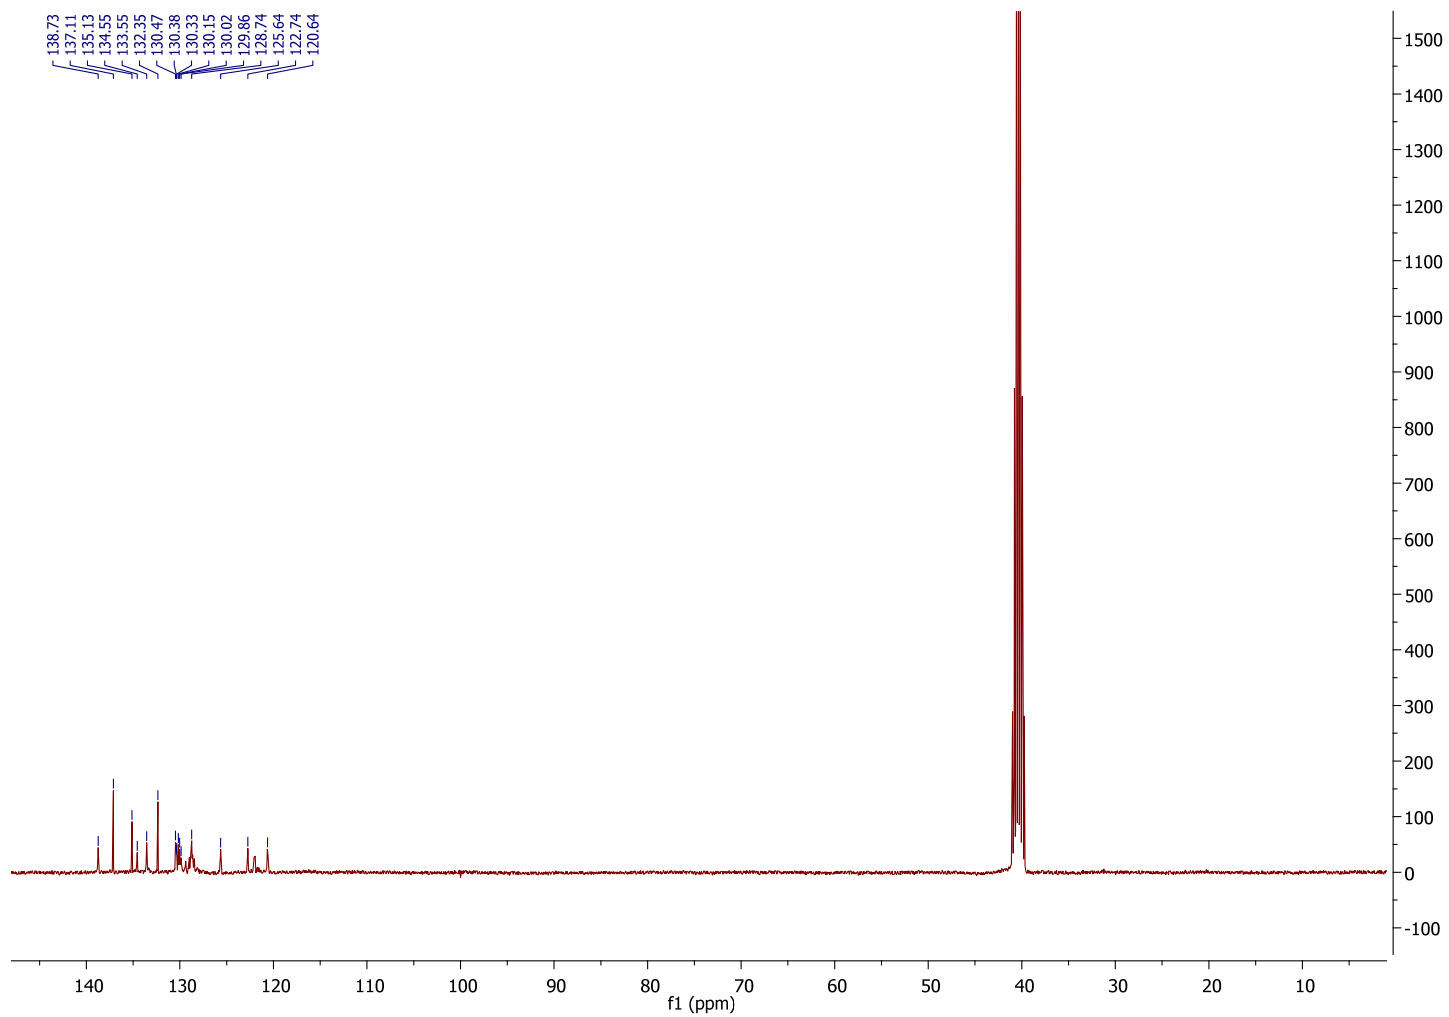

**Figure S88.**  $^{13}\text{C}$ -NMR spectrum for compound **44**.

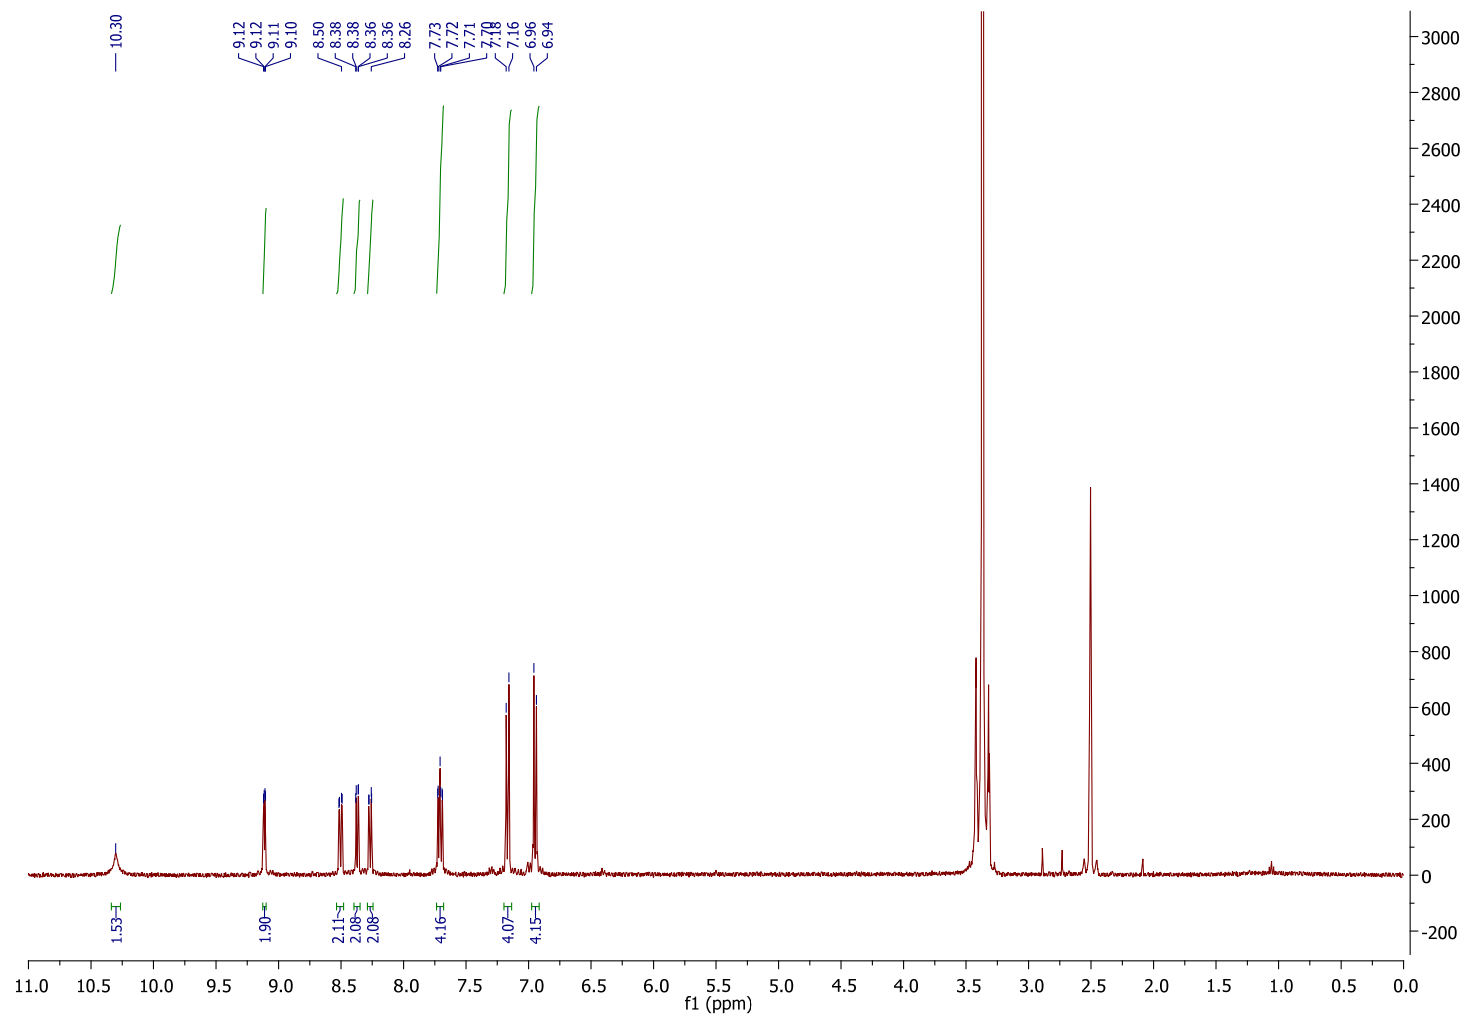

Figure S89. <sup>1</sup>H-NMR spectrum for compound 45.



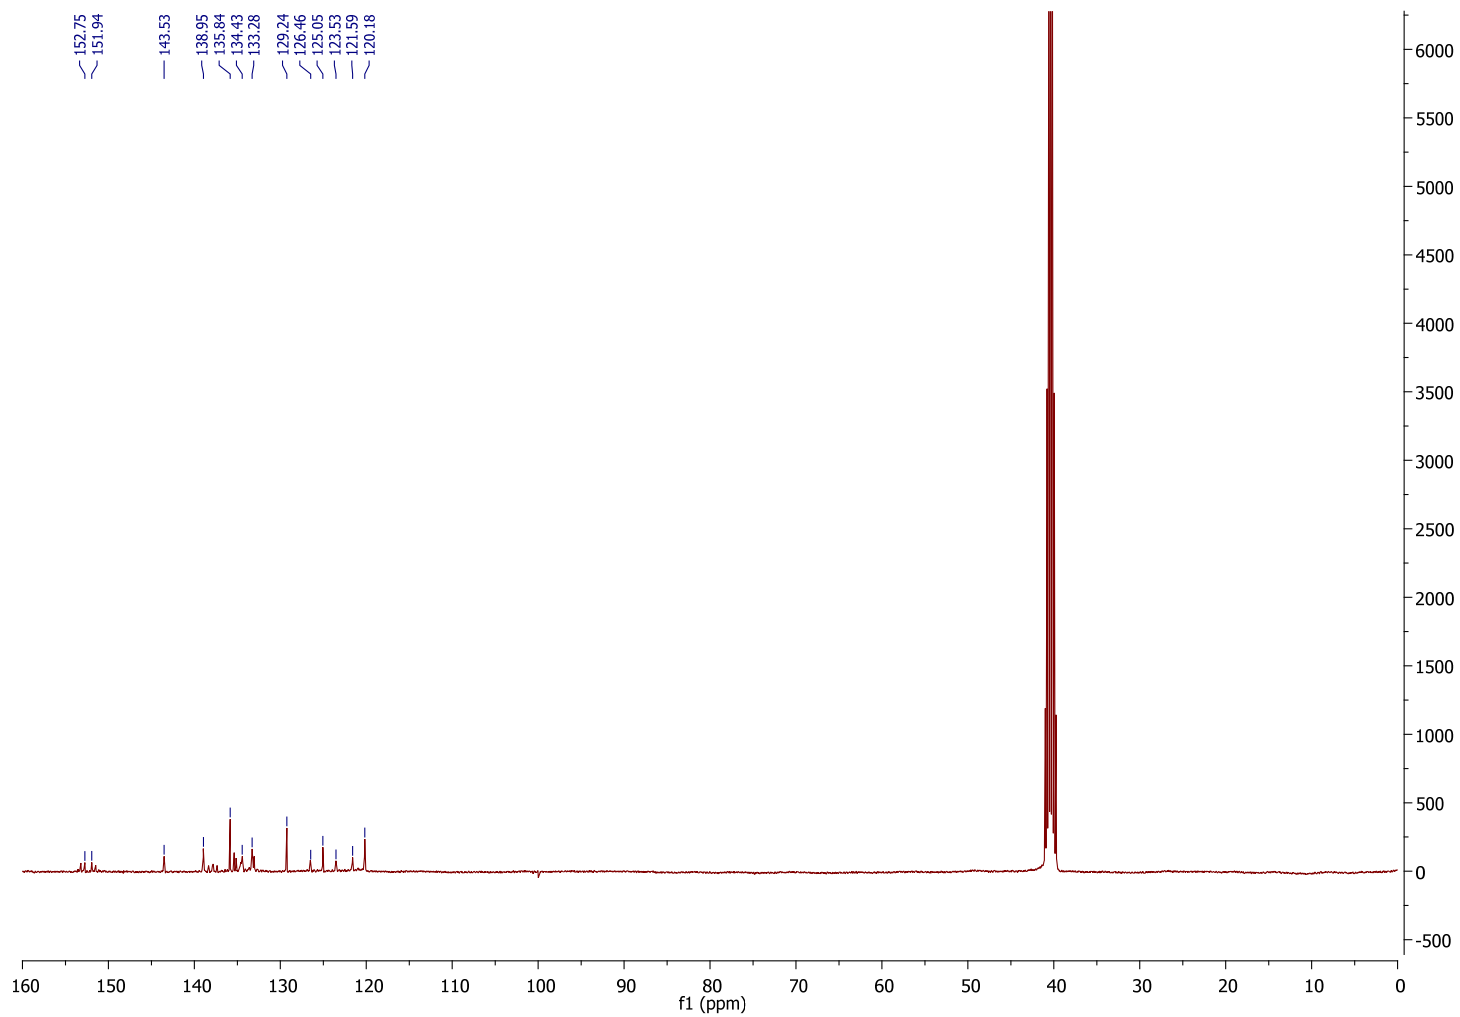

Figure S90.  $^{13}\text{C}$ -NMR spectrum for compound **45**.

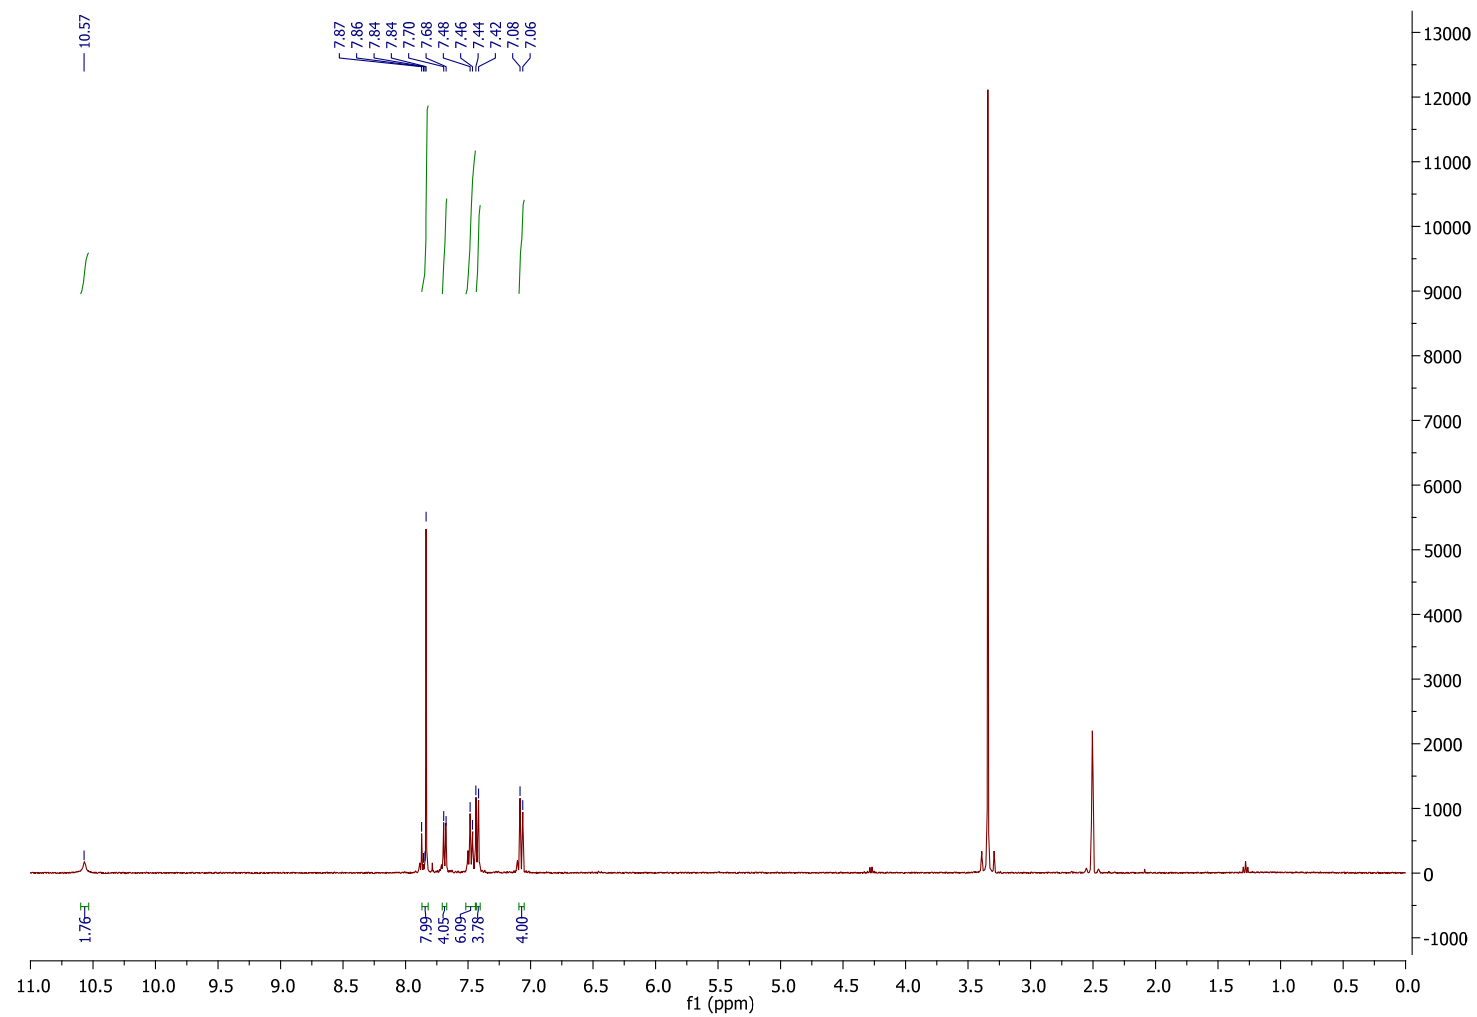

Figure S91. <sup>1</sup>H-NMR spectrum for compound 46.

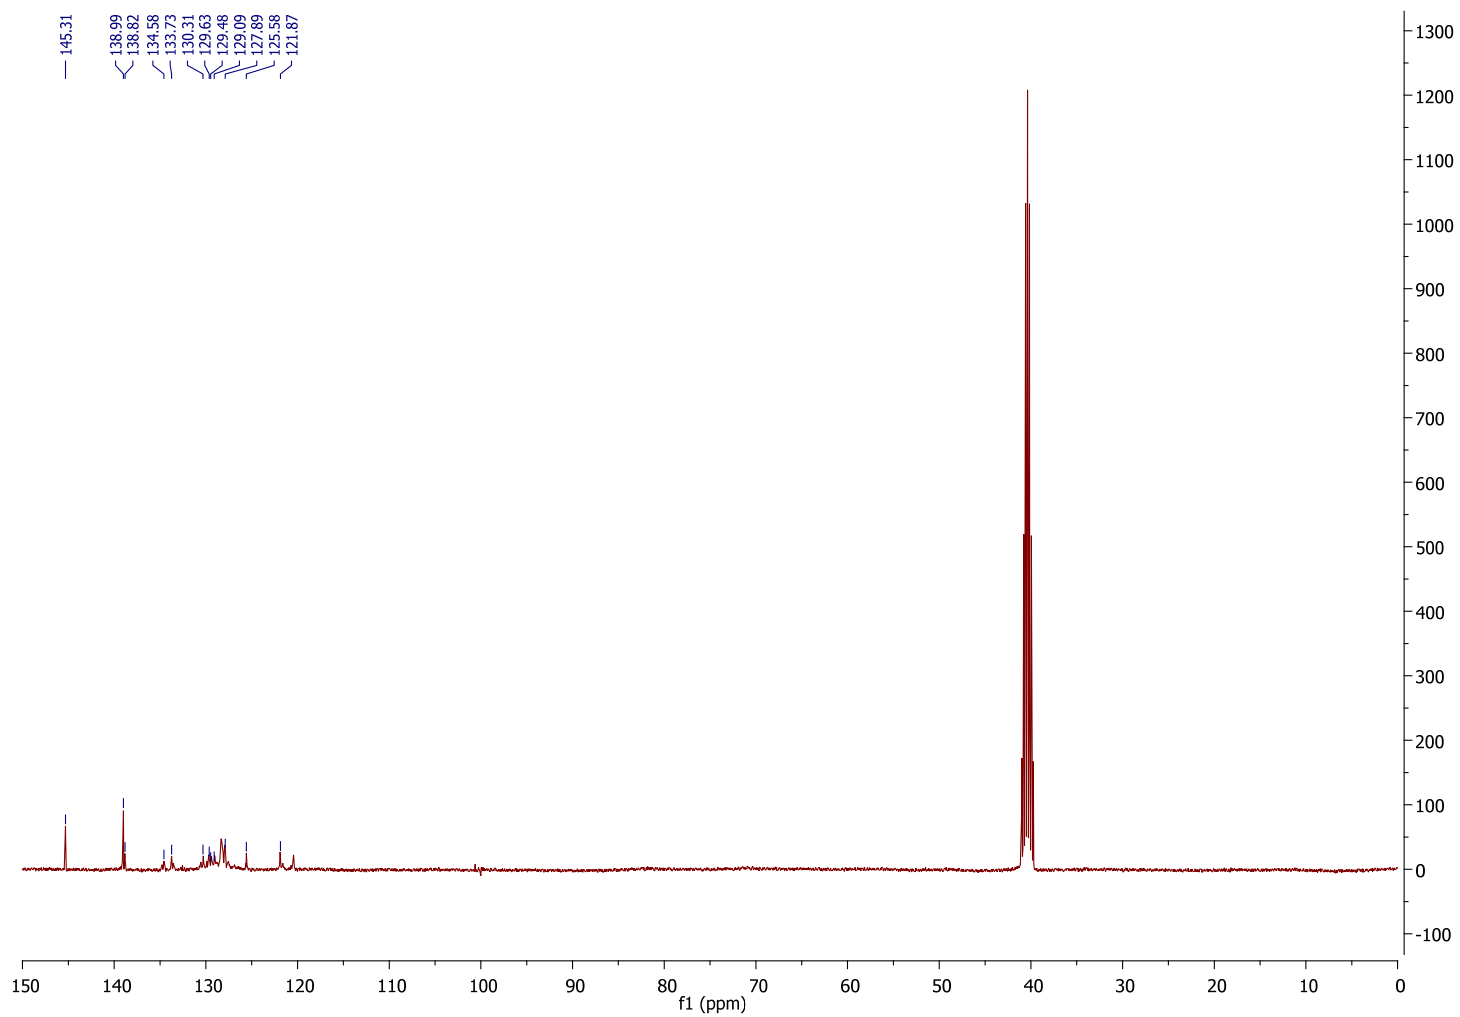

**Figure S92.**  $^{13}\text{C}$ -NMR spectrum for compound **46**.

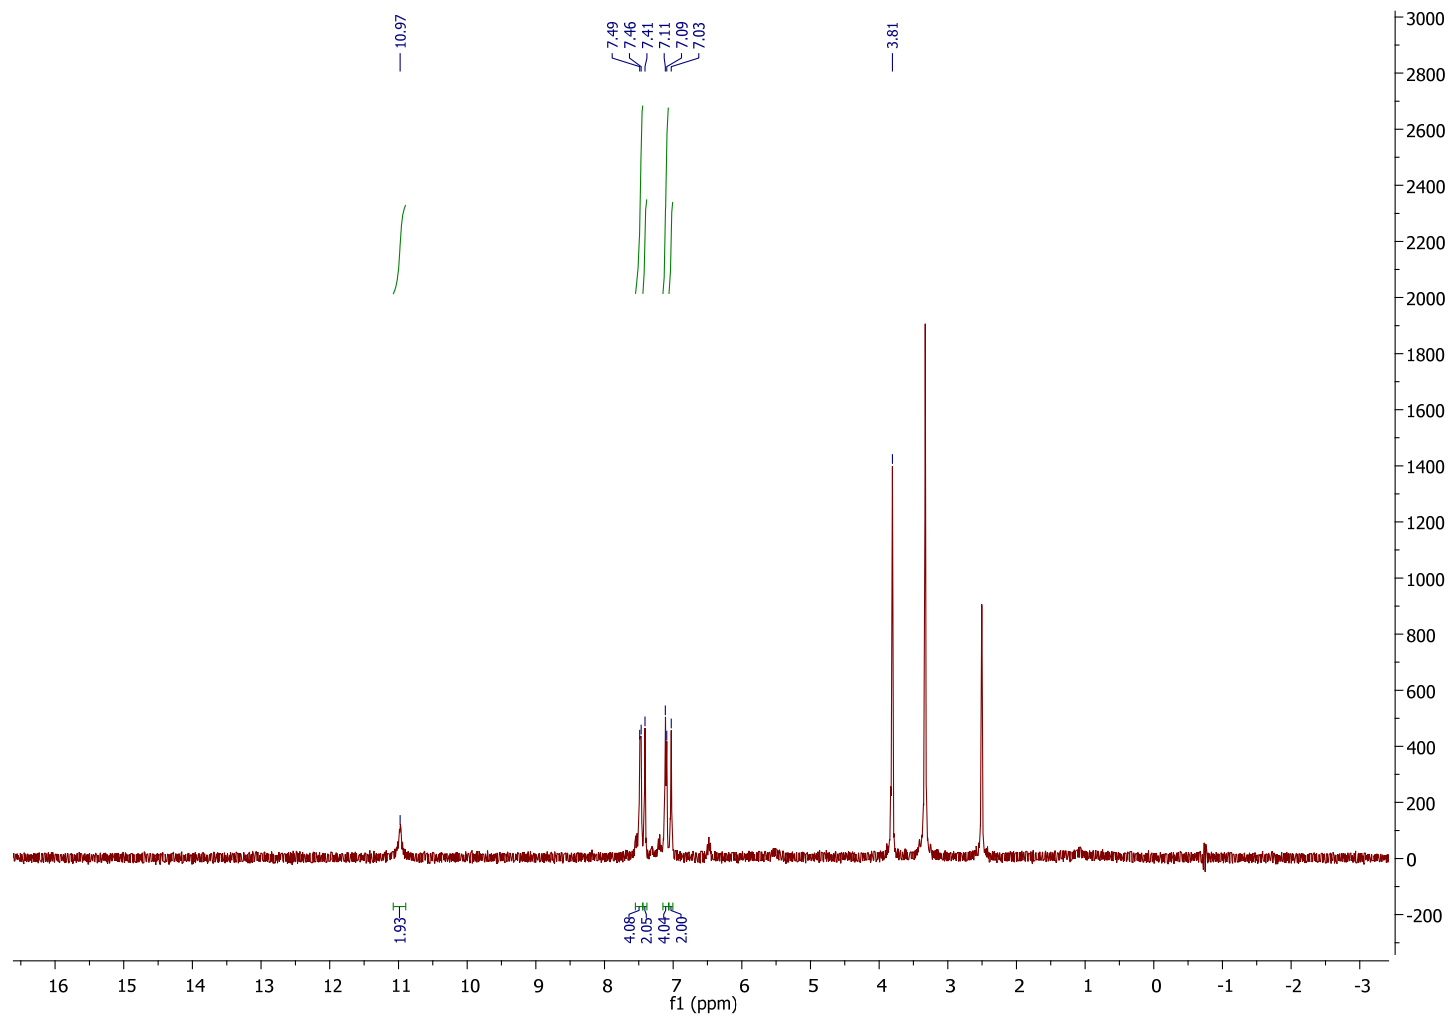

Figure S93. <sup>1</sup>H-NMR spectrum for compound 47.

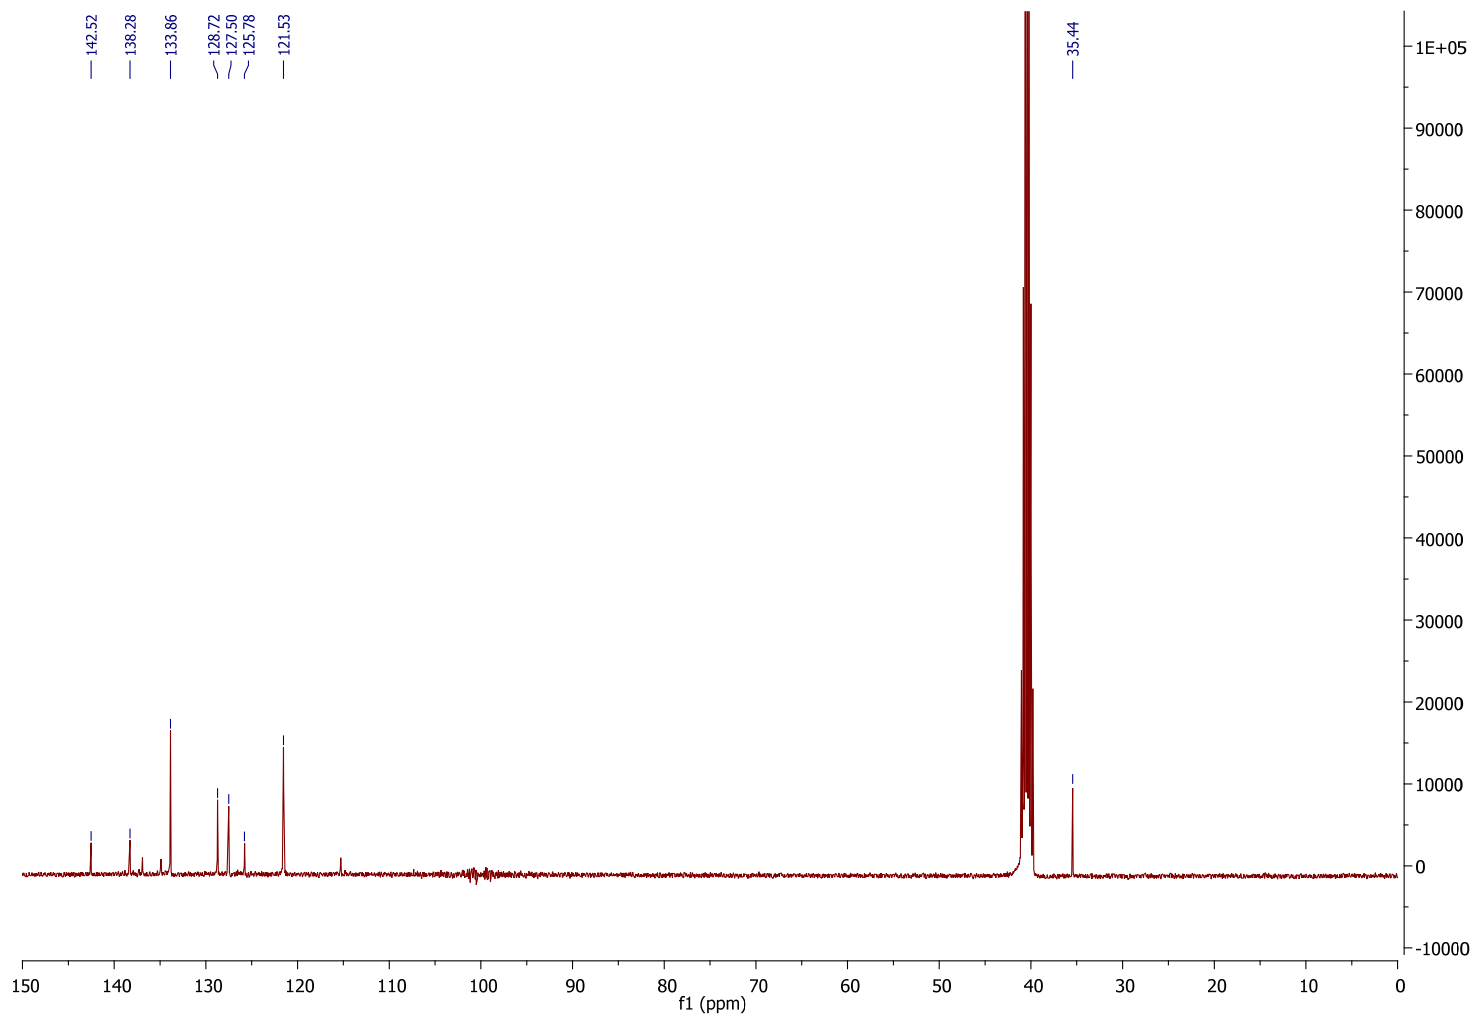

Figure S94. <sup>13</sup>C-NMR spectrum for compound 47.

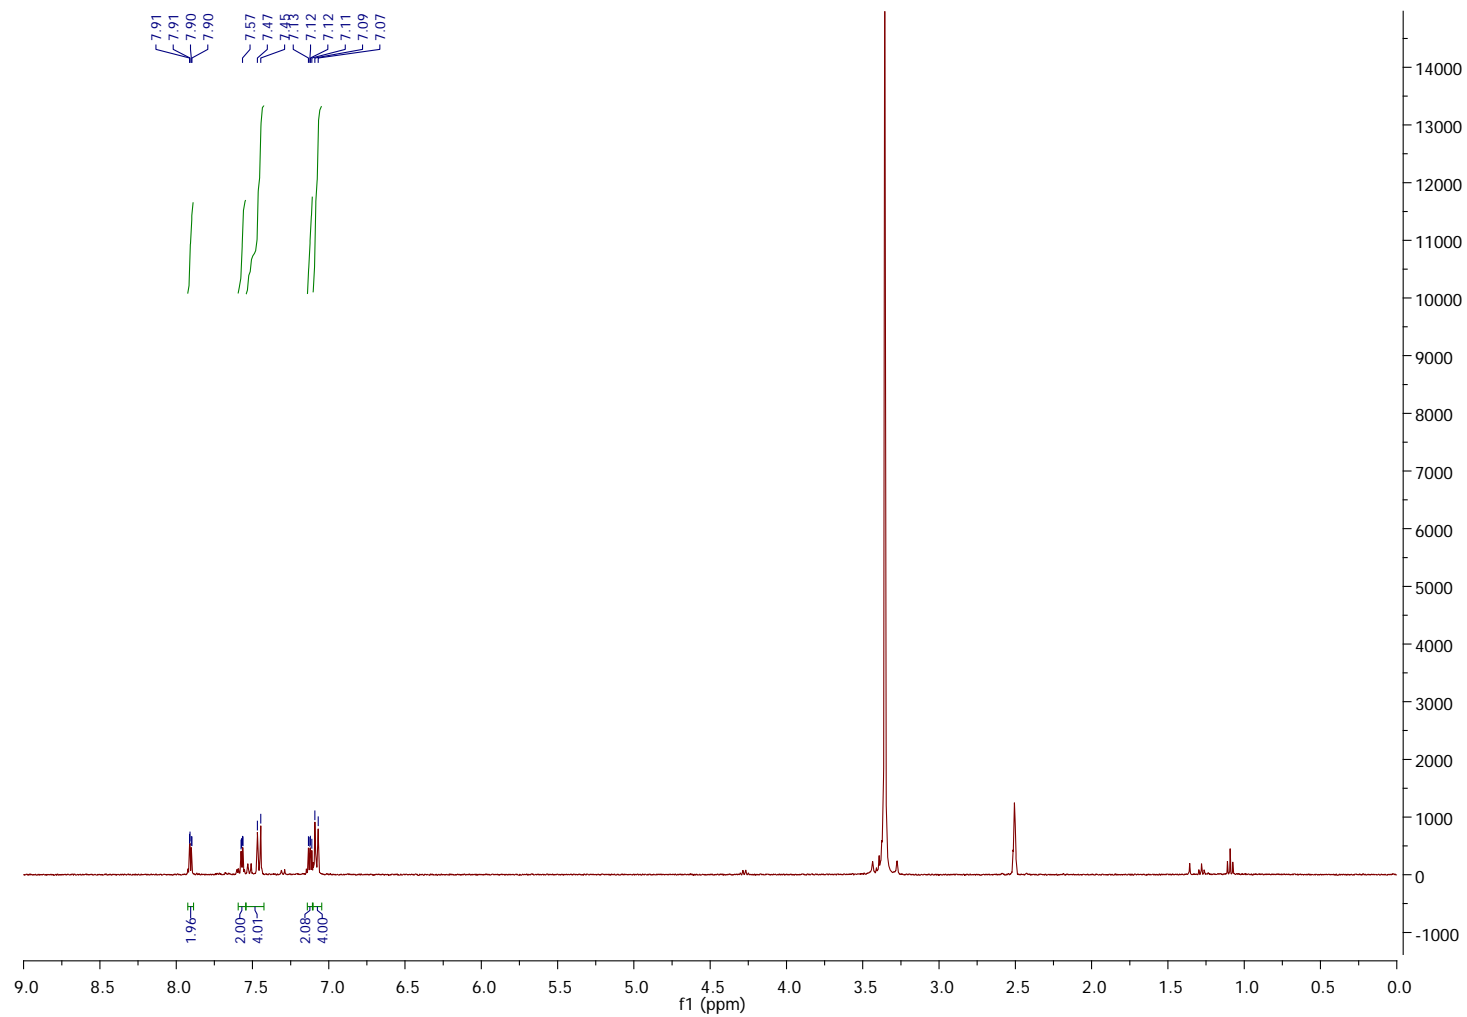

Figure S95. <sup>1</sup>H-NMR spectrum for compound 48.

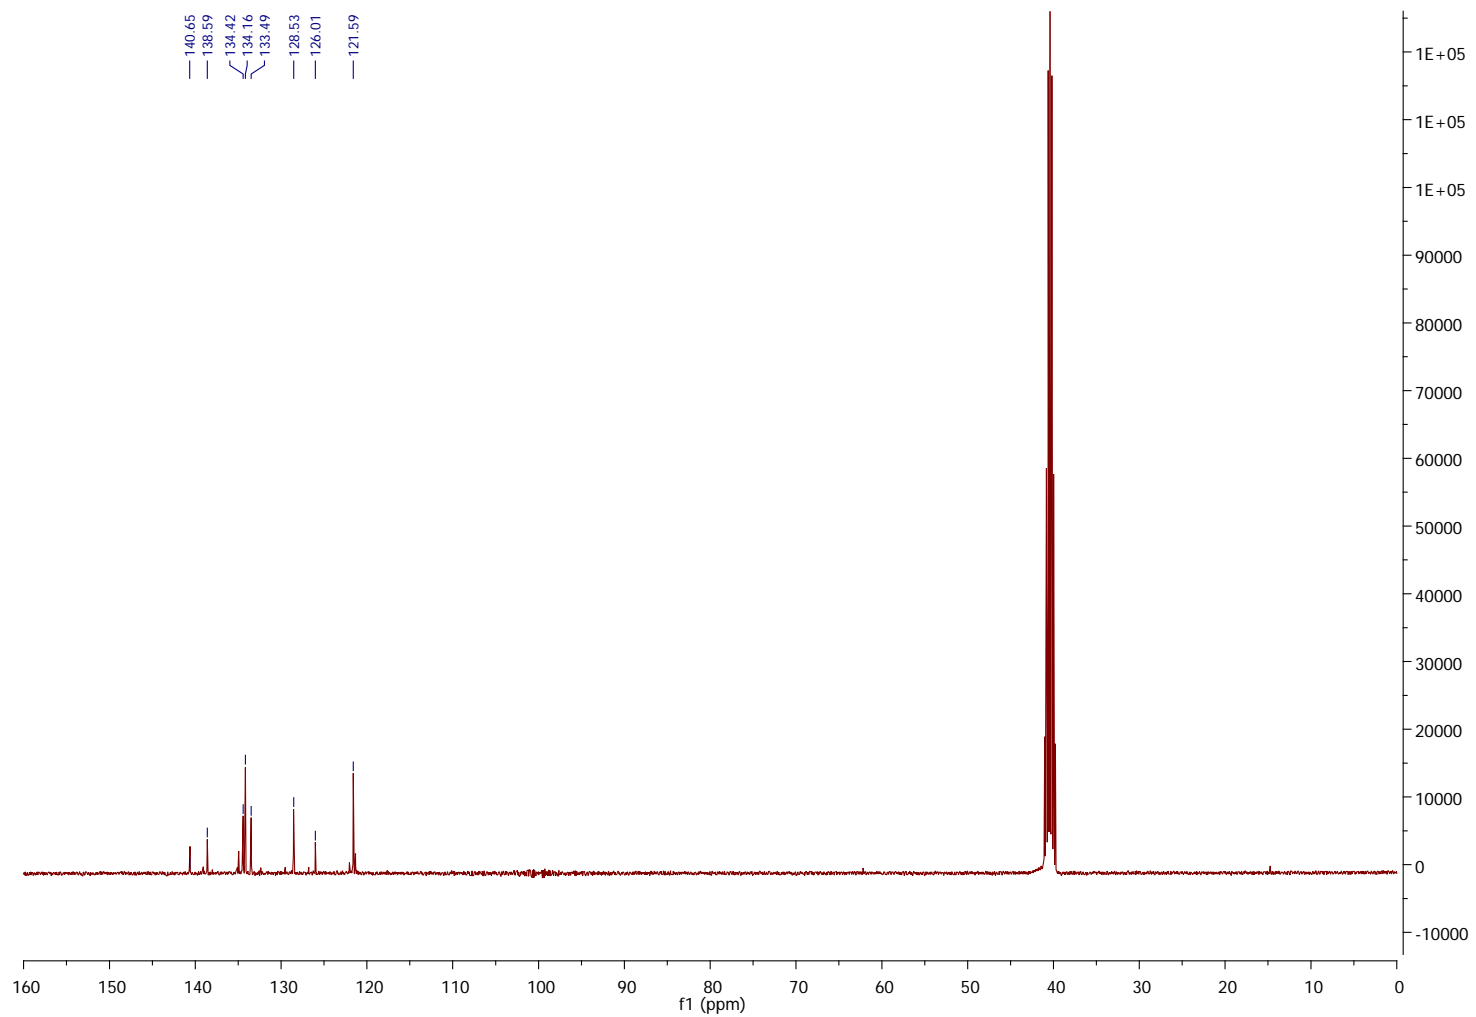

Figure S96.  $^{13}\text{C}$ -NMR spectrum for compound 48.
